# Supplementary material for: A Factor Graph Nested Effects Model To Identify Networks from Genetic Perturbations
Source: PLoS Comput Biol. 2009 Jan 30;5(1):e1000274. doi: 10.1371/journal.pcbi.1000274 (PMC2613752; doi:10.1371/journal.pcbi.1000274)
Supplement: Table S2 — Ion Homeostasis Frontier Genes. Genes most likely to be attached to the ion homeostasis network for both the FG-NEM and uFG-NEM methods. Genes are sorted by LAR. (2.75 MB XLS) [file pcbi.1000274.s007.xls]

## Sheet: Summary
FG-NEM Ion Homeostasis Frontier
ORF	Ion Homeostasis	LAR	NAME	Description
YKL220C	-	17.6572	FRE2	Ferric reductase and cupric reductase, reduces siderophore-bound iron and oxidized copper prior to uptake by transporters; expression induced by low iron levels but not by low copper levels YKL220C S000001703
YGL039W	-	14.8487		Oxidoreductase, catalyzes NADPH-dependent reduction of the bicyclic diketone bicyclo[2.2.2]octane-2,6-dione (BCO2,6D) to the chiral ketoalcohol (1R,4S,6S)-6-hydroxybicyclo[2.2.2]octane-2-one (BCO2one6ol)
YGR043C	-	14.1681	NQM1	Protein of unknown function; transcription is repressed by Mot1p and induced by alpha-factor and during diauxic shift; null mutant non-quiescent cells exhibit reduced reproductive capacity YGR043C S000003275
YDR270W	+	13.8404	CCC2	Cu(+2)-transporting P-type ATPase, required for export of copper from the cytosol into an extracytosolic compartment; has similarity to human proteins involved in Menkes and Wilsons diseases Null mutant is viable, exhibits defects in respiration and iron uptake YDR270W S000002678
YOR381W	+	13.7952	FRE3	Ferric reductase, reduces siderophore-bound iron prior to uptake by transporters; expression induced by low iron levels YOR381W S000005908
YHL040C	+	13.7449	ARN1	Transporter, member of the ARN family of transporters that specifically recognize siderophore-iron chelates; responsible for uptake of iron bound to ferrirubin, ferrirhodin, and related siderophores YHL040C S000001032
YER145C	+	12.1192	FTR1	High affinity iron permease involved in the transport of iron across the plasma membrane; forms complex with Fet3p; expression is regulated by iron Lacks high affinity iron uptake YER145C S000000947
YLR205C	+	12.0123	HMX1	ER localized, heme-binding peroxidase involved in the degradation of heme; does not exhibit heme oxygenase activity despite similarity to heme oxygenases; expression regulated by AFT1 YLR205C S000004195
YMR090W	-	11.4368		Putative protein of unknown function with similarity to DTDP-glucose 4,6-dehydratases; green fluorescent protein (GFP)-fusion protein localizes to the cytoplasm; YMR090W is not an essential gene
YHR137W	-	11.1727	ARO9	Aromatic aminotransferase II, catalyzes the first step of tryptophan, phenylalanine, and tyrosine catabolism YHR137W S000001179
YEL065W	+	11.1447	SIT1	ARN3 Ferrioxamine B transporter, member of the ARN family of transporters that specifically recognize siderophore-iron chelates; transcription is induced during iron deprivation and diauxic shift; potentially phosphorylated by Cdc28p Viable. Cells deleted from the gene are unable to take up ferrioxamine B YEL065W S000000791
YOR384W	-	10.9419	FRE5	Putative ferric reductase with similarity to Fre2p; expression induced by low iron levels; the authentic, non-tagged protein is detected in highly purified mitochondria in high-throughput studies YOR384W S000005911
YOR338W	-	10.6234		Putative protein of unknown function; YOR338W transcription is regulated by Azf1p and its transcript is a specific target of the G protein effector Scp160p; identified as being required for sporulation in a high-throughput mutant screen
YLR136C	+	10.5468	TIS11	CTH2 mRNA-binding protein expressed during iron starvation; binds to a sequence element in the 3'-untranslated regions of specific mRNAs to mediate their degradation; involved in iron homeostasis Null mutant is viable but alters metabolism that is reflected by a pH change on YPD plates. YLR136C S000004126
YOL158C	+	10.3917	ENB1	ARN4 Endosomal ferric enterobactin transporter, expressed under conditions of iron deprivation; member of the major facilitator superfamily; expression is regulated by Rcs1p and affected by chloroquine treatment YOL158C S000005518
uFG-NEM Ion Homeostasis Frontier
ORF	Ion Homeostasis		NAME	Description
YGL009C	-	12.0768	LEU1	Isopropylmalate isomerase, catalyzes the second step in the leucine biosynthesis pathway Leucine requiring YGL009C S000002977
YER174C	+	9.65599	GRX4	Hydroperoxide and superoxide-radical responsive glutathione-dependent oxidoreductase; monothiol glutaredoxin subfamily member along with Grx3p and Grx5p; protects cells from oxidative damage Null mutant is viable and shows moderate sensitivity to oxidative stress and increased oxidation levels of cell proteins YER174C S000000976
YMR120C	-	8.55343	ADE17	Enzyme of 'de novo' purine biosynthesis containing both 5-aminoimidazole-4-carboxamide ribonucleotide transformylase and inosine monophosphate cyclohydrolase activities, isozyme of Ade16p; ade16 ade17 mutants require adenine and histidine Null mutant is viable; ade16 ade17 double mutants require adenine YMR120C S000004727
YGR286C	-	7.52011	BIO2	Biotin synthase, catalyzes the conversion of dethiobiotin to biotin, which is the last step of the biotin biosynthesis pathway; complements E. coli bioB mutant YGR286C S000003518
YGR234W	-	7.27262	YHB1	YHB4 Nitric oxide oxidoreductase, flavohemoglobin involved in nitric oxide detoxification; plays a role in the oxidative and nitrosative stress responses Null mutant is viable. A rho+ strain carrying a yhb1(-) deletion has normal levels of both cyanide-sensitive and cyanide-insensitive respiration. Cells that carry a yhb1(-) deletion are sensitive to conditions that promote oxidative stress. YGR2…
YNR074C	-	6.87437	AIF1	CPD1 Mitochondrial cell death effector that translocates to the nucleus in response to apoptotic stimuli, homolog of mammalian Apoptosis-Inducing Factor, putative reductase YNR074C S000005357
YOR356W	-	6.36849		Mitochondrial protein with similarity to flavoprotein-type oxidoreductases; found in a large supramolecular complex with other mitochondrial dehydrogenases
YJR048W	-	5.93269	CYC1	Cytochrome c, isoform 1; electron carrier of the mitochondrial intermembrane space that transfers electrons from ubiquinone-cytochrome c oxidoreductase to cytochrome c oxidase during cellular respiration Cytochrome c deficiency YJR048W S000003809
YIL015W	-	5.7265	BAR1	SST1 Aspartyl protease secreted into the periplasmic space of mating type a cells, helps cells find mating partners, cleaves and inactivates alpha factor allowing cells to recover from alpha-factor-induced cell cycle arrest MATa bar1 cells are supersensitive to the G1 arrest induced by alpha factor YIL015W S000001277
YDL171C	-	5.45619	GLT1	NAD(+)-dependent glutamate synthase (GOGAT), synthesizes glutamate from glutamine and alpha-ketoglutarate; with Gln1p, forms the secondary pathway for glutamate biosynthesis from ammonia; expression regulated by nitrogen source YDL171C S000002330
YER001W	-	4.96146	MNN1	Alpha-1,3-mannosyltransferase, integral membrane glycoprotein of the Golgi complex, required for addition of alpha1,3-mannose linkages to N-linked and O-linked oligosaccharides, one of five S. cerevisiae proteins of the MNN1 family YER001W S000000803
YPL274W	-	4.77732	SAM3	High-affinity S-adenosylmethionine permease, required for utilization of S-adenosylmethionine as a sulfur source; has similarity to S-methylmethionine permease Mmp1p Null mutant is viable but has inability to use S-adenosylmethionine as a sulfur source YPL274W S000006195
YEL071W	-	4.34509	DLD3	D-lactate dehydrogenase, part of the retrograde regulon which consists of genes whose expression is stimulated by damage to mitochondria and reduced in cells grown with glutamate as the sole nitrogen source, located in the cytoplasm YEL071W S000000797
YLR130C	-	4.19621	ZRT2	Low-affinity zinc transporter of the plasma membrane; transcription is induced under low-zinc conditions by the Zap1p transcription factor Null mutant is viable; ZRT2 overexpression increases rate of zinc uptake YLR130C S000004120
YHR216W	-	4.04454	IMD2	PUR5 Inosine monophosphate dehydrogenase, catalyzes the first step of GMP biosynthesis, expression is induced by mycophenolic acid resulting in resistance to the drug, expression is repressed by nutrient limitation YHR216W S000001259

## Sheet: fgnem.tab
ORF	S-gene	Ion Homeostasis	LAR	NAME	Description
YKL220C	-	-	17.6572	FRE2	Ferric reductase and cupric reductase, reduces siderophore-bound iron and oxidized copper prior to uptake by transporters; expression induced by low iron levels but not by low copper levels YKL220C S000001703
YGL039W	-	-	14.8487		NO_MATCH
YGR043C	-	-	14.1681	NQM1	Protein of unknown function; transcription is repressed by Mot1p and induced by alpha-factor and during diauxic shift; null mutant non-quiescent cells exhibit reduced reproductive capacity YGR043C S000003275
YDR270W	-	+	13.8404	CCC2	Cu(+2)-transporting P-type ATPase, required for export of copper from the cytosol into an extracytosolic compartment; has similarity to human proteins involved in Menkes and Wilsons diseases Null mutant is viable, exhibits defects in respiration and iron uptake YDR270W S000002678
YOR381W	-	+	13.7952	FRE3	Ferric reductase, reduces siderophore-bound iron prior to uptake by transporters; expression induced by low iron levels YOR381W S000005908
YHL040C	-	+	13.7449	ARN1	Transporter, member of the ARN family of transporters that specifically recognize siderophore-iron chelates; responsible for uptake of iron bound to ferrirubin, ferrirhodin, and related siderophores YHL040C S000001032
YER145C	-	+	12.1192	FTR1	High affinity iron permease involved in the transport of iron across the plasma membrane; forms complex with Fet3p; expression is regulated by iron Lacks high affinity iron uptake YER145C S000000947
YLR205C	-	+	12.0123	HMX1	ER localized, heme-binding peroxidase involved in the degradation of heme; does not exhibit heme oxygenase activity despite similarity to heme oxygenases; expression regulated by AFT1 YLR205C S000004195
YMR090W	-	-	11.4368		NO_MATCH
YHR137W	-	-	11.1727	ARO9	Aromatic aminotransferase II, catalyzes the first step of tryptophan, phenylalanine, and tyrosine catabolism YHR137W S000001179
YEL065W	-	+	11.1447	SIT1	ARN3 Ferrioxamine B transporter, member of the ARN family of transporters that specifically recognize siderophore-iron chelates; transcription is induced during iron deprivation and diauxic shift; potentially phosphorylated by Cdc28p Viable. Cells deleted from the gene are unable to take up ferrioxamine B YEL065W S000000791
YOR384W	-	-	10.9419	FRE5	Putative ferric reductase with similarity to Fre2p; expression induced by low iron levels; the authentic, non-tagged protein is detected in highly purified mitochondria in high-throughput studies YOR384W S000005911
YOR338W	-	-	10.6234		NO_MATCH
YLR136C	-	+	10.5468	TIS11	CTH2 mRNA-binding protein expressed during iron starvation; binds to a sequence element in the 3'-untranslated regions of specific mRNAs to mediate their degradation; involved in iron homeostasis Null mutant is viable but alters metabolism that is reflected by a pH change on YPD plates. YLR136C S000004126
YOL158C	-	+	10.3917	ENB1	ARN4 Endosomal ferric enterobactin transporter, expressed under conditions of iron deprivation; member of the major facilitator superfamily; expression is regulated by Rcs1p and affected by chloroquine treatment YOL158C S000005518
YMR169C	-	-	10.2582	ALD3	Cytoplasmic aldehyde dehydrogenase, involved in beta-alanine synthesis; uses NAD+ as the preferred coenzyme; very similar to Ald2p; expression is induced by stress and repressed by glucose YMR169C S000004779
YOR382W	-	-	10.2422	FIT2	Mannoprotein that is incorporated into the cell wall via a glycosylphosphatidylinositol (GPI) anchor, involved in the retention of siderophore-iron in the cell wall YOR382W S000005909
YDR070C	-	-	9.80271	FMP16	Putative protein of unknown function; the authentic, non-tagged protein is detected in highly purified mitochondria in high-throughput studies YDR070C S000002477
YOR383C	-	-	9.66484	FIT3	Mannoprotein that is incorporated into the cell wall via a glycosylphosphatidylinositol (GPI) anchor, involved in the retention of siderophore-iron in the cell wall YOR383C S000005910
YER174C	-	+	9.65599	GRX4	Hydroperoxide and superoxide-radical responsive glutathione-dependent oxidoreductase; monothiol glutaredoxin subfamily member along with Grx3p and Grx5p; protects cells from oxidative damage Null mutant is viable and shows moderate sensitivity to oxidative stress and increased oxidation levels of cell proteins YER174C S000000976
YLR056W	-	-	9.60059	ERG3	PSO6|SYR1 C-5 sterol desaturase, catalyzes the introduction of a C-5(6) double bond into episterol, a precursor in ergosterol biosynthesis; mutants are viable, but cannot grow on non-fermentable carbon sources Null mutant is inviable; suppresses syringomycin resistant mutant; sensitive to photoactivated 3-carbethoxypsoralen, UV light, radiomimetic mutagens, and oxidative stress YLR056W S000004046
YHL047C	-	+	9.57809	ARN2	TAF1 Transporter, member of the ARN family of transporters that specifically recognize siderophore-iron chelates; responsible for uptake of iron bound to the siderophore triacetylfusarinine C YHL047C S000001039
YHR214C-B	-	-	9.3608		NO_MATCH
YMR058W	-	+	9.18622	FET3	Ferro-O2-oxidoreductase required for high-affinity iron uptake and involved in mediating resistance to copper ion toxicity, belongs to class of integral membrane multicopper oxidases The null mutant is viable but defective for high affinity Fe(II) uptake. The null mutant is inviable when environmental iron is limiting. YMR058W S000004662
YDR264C	-	-	8.94687	AKR1	Palmitoyl transferase involved in protein palmitoylation; acts as a negative regulator of pheromone response pathway; required for endocytosis of pheromone receptors; involved in cell shape control; contains ankyrin repeats Null mutant is viable, exhibits slow growth, abnormal morphology, and partial activation of pheromone response; defective for endocytosis of Ste2p and Ste3p YDR264C S000002672
YDR534C	-	-	8.87453	FIT1	Mannoprotein that is incorporated into the cell wall via a glycosylphosphatidylinositol (GPI) anchor, involved in the retention of siderophore-iron in the cell wall Impaired siderophore-iron uptake, activation of the major iron-dependent transcription factor AFT1. YDR534C S000002942
YML131W	-	-	8.81393		NO_MATCH
YDL204W	-	-	8.5361	RTN2	Protein of unknown function; has similarity to mammalian reticulon proteins; member of the RTNLA (reticulon-like A) subfamily YDL204W S000002363
YGL009C	-	-	8.51044	LEU1	Isopropylmalate isomerase, catalyzes the second step in the leucine biosynthesis pathway Leucine requiring YGL009C S000002977
YMR170C	-	-	8.47859	ALD2	Cytoplasmic aldehyde dehydrogenase, involved in ethanol oxidation and beta-alanine biosynthesis; uses NAD+ as the preferred coenzyme; expression is stress induced and glucose repressed; very similar to Ald3p YMR170C S000004780
YJR029W	-	-	8.45414		NO_MATCH
YMR120C	-	-	8.11263	ADE17	Enzyme of 'de novo' purine biosynthesis containing both 5-aminoimidazole-4-carboxamide ribonucleotide transformylase and inosine monophosphate cyclohydrolase activities, isozyme of Ade16p; ade16 ade17 mutants require adenine and histidine Null mutant is viable; ade16 ade17 double mutants require adenine YMR120C S000004727
YKR039W	-	-	8.04417	GAP1	General amino acid permease; localization to the plasma membrane is regulated by nitrogen source abolished activity of the general amino acid transport system YKR039W S000001747
YNR056C	-	-	7.9893	BIO5	Putative transmembrane protein involved in the biotin biosynthesis pathway; responsible for uptake of 7-keto 8-aminopelargonic acid; BIO5 is in a cluster of 3 genes (BIO3, BIO4, and BIO5) that mediate biotin synthesis YNR056C S000005339
YBR207W	-	-	7.69793	FTH1	Putative high affinity iron transporter involved in transport of intravacuolar stores of iron; forms complex with Fet5p; expression is regulated by iron; proposed to play indirect role in endocytosis YBR207W S000000411
YLL051C	-	-	7.66389	FRE6	Putative ferric reductase with similarity to Fre2p; expression induced by low iron levels YLL051C S000003974
YGR234W	-	-	7.27262	YHB1	YHB4 Nitric oxide oxidoreductase, flavohemoglobin involved in nitric oxide detoxification; plays a role in the oxidative and nitrosative stress responses Null mutant is viable. A rho+ strain carrying a yhb1(-) deletion has normal levels of both cyanide-sensitive and cyanide-insensitive respiration. Cells that carry a yhb1(-) deletion are sensitive to conditions that promote oxidative stress. YGR2…
YBR295W	-	+	7.07271	PCA1	CAD2|PAY2 Cadmium transporting P-type ATPase; may also have a role in copper and iron homeostasis; S288C and most other lab strains contain a G970R mutation which eliminates normal cadmium transport function Null mutant is viable but ceases growth earlier when grown in minimal medium with high copper concentration; overexpression of PCA1 causes poor growth; multicopy PCA1 results in slower growth…
YLR126C	-	+	7.02378		NO_MATCH
YNR074C	-	-	6.87437	AIF1	CPD1 Mitochondrial cell death effector that translocates to the nucleus in response to apoptotic stimuli, homolog of mammalian Apoptosis-Inducing Factor, putative reductase YNR074C S000005357
YDR476C	-	-	6.85597		NO_MATCH
YML039W	-	-	6.84435		NO_MATCH
YLR214W	-	-	6.78249	FRE1	Ferric reductase and cupric reductase, reduces siderophore-bound iron and oxidized copper prior to uptake by transporters; expression induced by low copper and iron levels Null mutant is viable, fre1-1 mutants are deficient in the uptake of ferric iron and are extremely sensitive to iron deprivation YLR214W S000004204
YDR380W	-	-	6.6838	ARO10	Phenylpyruvate decarboxylase, catalyzes decarboxylation of phenylpyruvate to phenylacetaldehyde, which is the first specific step in the Ehrlich pathway YDR380W S000002788
YER011W	-	-	6.6473	TIR1	SRP1 Cell wall mannoprotein of the Srp1p/Tip1p family of serine-alanine-rich proteins; expression is downregulated at acidic pH and induced by cold shock and anaerobiosis; abundance is increased in cells cultured without shaking YER011W S000000813
YGL055W	-	-	6.51876	OLE1	MDM2 Delta(9) fatty acid desaturase, required for monounsaturated fatty acid synthesis and for normal distribution of mitochondria The null mutant is inviable but can be rescued by addition of unsaturarted fatty acids to the growth medium. Some alleles are temperature-sensitive for growth and show defective intracellular mitochondrial movement atthe non- permissive temperature. YGL055W S000003023
YER130C	-	-	6.51778		NO_MATCH
YOL101C	-	+	6.51508	IZH4	Membrane protein involved in zinc metabolism, member of the four-protein IZH family, expression induced by fatty acids and altered zinc levels; deletion reduces sensitivity to excess zinc; possible role in sterol metabolism YOL101C S000005461
YKR052C	-	-	6.38276	MRS4	Mitochondrial iron transporter of the mitochondrial carrier family (MCF), very similar to and functionally redundant with Mrs3p; functions under low-iron conditions; may transport other cations in addition to iron Null mutant is viable, has no defects in mitochondrial function. Mrs4p overexpression causes a temperature sensitive petite phenotype in a wild-type background and can suppress the mito…
YOR356W	-	-	6.36849		NO_MATCH
YMR134W	-	+	6.34816	ERG29	Protein that binds to and regulates Erg25p; localized to the ER; null mutant is viable in a respiratory defective background; synthetic lethal with mmt1 and mmt2 mutations; highly conserved in ascomycetes YMR134W S000004741
YOR237W	-	-	6.2937	HES1	OSH5 Protein implicated in the regulation of ergosterol biosynthesis; one of a seven member gene family with a common essential function and non-essential unique functions; similar to human oxysterol binding protein (OSBP) pleiotropic sterol-related phenotypes YOR237W S000005763
YER138C	-	-	6.13811		NO_MATCH
YGR286C	-	-	6.13139	BIO2	Biotin synthase, catalyzes the conversion of dethiobiotin to biotin, which is the last step of the biotin biosynthesis pathway; complements E. coli bioB mutant YGR286C S000003518
YJL116C	-	-	5.93508	NCA3	Protein that functions with Nca2p to regulate mitochondrial expression of subunits 6 (Atp6p) and 8 (Atp8p ) of the Fo-F1 ATP synthase; member of the SUN family YJL116C S000003652
YJR048W	-	-	5.93269	CYC1	Cytochrome c, isoform 1; electron carrier of the mitochondrial intermembrane space that transfers electrons from ubiquinone-cytochrome c oxidoreductase to cytochrome c oxidase during cellular respiration Cytochrome c deficiency YJR048W S000003809
YGL121C	-	-	5.82642	GPG1	Proposed gamma subunit of the heterotrimeric G protein that interacts with the receptor Grp1p; involved in regulation of pseudohyphal growth; requires Gpb1p or Gpb2p to interact with Gpa2p Null: A modest reduction in pseudohyphal differentiation, invasive growth, and FLO11 expression YGL121C S000003089
YNR060W	-	+	5.78905	FRE4	Ferric reductase, reduces a specific subset of siderophore-bound iron prior to uptake by transporters; expression induced by low iron levels YNR060W S000005343
YBL101W-B	-	-	5.7739		NO_MATCH
YBL005W-B	-	-	5.76473		NO_MATCH
YIL015W	-	-	5.7265	BAR1	SST1 Aspartyl protease secreted into the periplasmic space of mating type a cells, helps cells find mating partners, cleaves and inactivates alpha factor allowing cells to recover from alpha-factor-induced cell cycle arrest MATa bar1 cells are supersensitive to the G1 arrest induced by alpha factor YIL015W S000001277
YNL065W	-	-	5.71432	AQR1	Plasma membrane multidrug transporter of the major facilitator superfamily, confers resistance to short-chain monocarboxylic acids and quinidine; involved in the excretion of excess amino acids Null mutant is viable, but exhibits increased susceptibility to low-chain organic acids (C2-C6), azoles, antimalarial quinoline-ring containing drugs, malachite green and crystal violet YNL065W S000005009
YHR092C	-	-	5.67837	HXT4	LGT1|RAG1 High-affinity glucose transporter of the major facilitator superfamily, expression is induced by low levels of glucose and repressed by high levels of glucose YHR092C S000001134
YAR073W	-	-	5.66129	IMD1	Nonfunctional protein with homology to IMP dehydrogenase; probable pseudogene, located close to the telomere; is not expressed at detectable levels; YAR073W and YAR075W comprise a continuous reading frame in some strains of S. cerevisiae YAR073W S000000095
YLR334C	-	-	5.65113		NO_MATCH
YIL060W	-	-	5.6052		NO_MATCH
YPL135W	-	+	5.45821	ISU1	NUA1 Conserved protein of the mitochondrial matrix, performs a scaffolding function during assembly of iron-sulfur clusters, interacts physically and functionally with yeast frataxin (Yfh1p); isu1 isu2 double mutant is inviable Null mutant is viable on YPD at 30 degrees C, and is synthetically lethal with isu2 null. YPL135W S000006056
YDL171C	-	-	5.45619	GLT1	NAD(+)-dependent glutamate synthase (GOGAT), synthesizes glutamate from glutamine and alpha-ketoglutarate; with Gln1p, forms the secondary pathway for glutamate biosynthesis from ammonia; expression regulated by nitrogen source YDL171C S000002330
YJR027W	-	-	5.29991		NO_MATCH
YMR045C	-	-	5.2456		NO_MATCH
YHR216W	-	-	5.17993	IMD2	PUR5 Inosine monophosphate dehydrogenase, catalyzes the first step of GMP biosynthesis, expression is induced by mycophenolic acid resulting in resistance to the drug, expression is repressed by nutrient limitation YHR216W S000001259
YER001W	-	-	5.00532	MNN1	Alpha-1,3-mannosyltransferase, integral membrane glycoprotein of the Golgi complex, required for addition of alpha1,3-mannose linkages to N-linked and O-linked oligosaccharides, one of five S. cerevisiae proteins of the MNN1 family YER001W S000000803
YER160C	-	-	4.99968		NO_MATCH
YLR343W	-	-	4.98478	GAS2	1,3-beta-glucanosyltransferase, involved with Gas4p in spore wall assembly; has similarity to Gas1p YLR343W S000004335
YJL149W	-	-	4.9241	DAS1	Putative SCF ubiquitin ligase F-box protein; interacts physically with both Cdc53p and Skp1 and genetically with CDC34; similar to putative F-box protein YDR131C; null mutant suppresses dst1delta sensitivity for 6-azauracil YJL149W S000003685
YCL019W	-	-	4.89563		NO_MATCH
YFR024C	-	-	4.88619		NO_MATCH
YOR289W	-	-	4.86689		NO_MATCH
YPL274W	-	-	4.77732	SAM3	High-affinity S-adenosylmethionine permease, required for utilization of S-adenosylmethionine as a sulfur source; has similarity to S-methylmethionine permease Mmp1p Null mutant is viable but has inability to use S-adenosylmethionine as a sulfur source YPL274W S000006195
YHR199C	-	-	4.7765	AIM46	FMP34 Putative protein of unknown function; the authentic, non-tagged protein is detected in highly purified mitochondria in high-throughput studies; null mutant displays increased frequency of mitochondrial genome loss (petite formation) YHR199C S000001242
YJR096W	-	-	4.72814		NO_MATCH
YDR533C	-	-	4.72555	HSP31	Possible chaperone and cysteine protease with similarity to E. coli Hsp31; member of the DJ-1/ThiJ/PfpI superfamily, which includes human DJ-1 involved in Parkinson's disease; exists as a dimer and contains a putative metal-binding site YDR533C S000002941
YER024W	-	-	4.72236	YAT2	Carnitine acetyltransferase; has similarity to Yat1p, which is a carnitine acetyltransferase associated with the mitochondrial outer membrane Null: viable. Other phenotypes: The cit2yat2 double mutant does not grow on ethanol, glycerol and acetate in the presence of carnitine. YER024W S000000826
YPL272C	-	-	4.65126		NO_MATCH
YKL026C	-	-	4.58601	GPX1	Phospholipid hydroperoxide glutathione peroxidase induced by glucose starvation that protects cells from phospholipid hydroperoxides and nonphospholipid peroxides during oxidative stress YKL026C S000001509
YOR173W	-	-	4.55701	DCS2	Non-essential, stress induced regulatory protein containing a HIT (histidine triad) motif; modulates m7G-oligoribonucleotide metabolism; inhibits Dcs1p; regulated by Msn2p, Msn4p, and the Ras-cAMP-cAPK signaling pathway, similar to Dcs1p. YOR173W S000005699
YPL171C	-	-	4.53082	OYE3	ZRG6 Widely conserved NADPH oxidoreductase containing flavin mononucleotide (FMN), homologous to Oye2p with slight differences in ligand binding and catalytic properties; may be involved in sterol metabolism YPL171C S000006092
YMR251W	-	-	4.48146	GTO3	Omega class glutathione transferase; putative cytosolic localization YMR251W S000004863
YLR100W	-	-	4.45912	ERG27	3-keto sterol reductase, catalyzes the last of three steps required to remove two C-4 methyl groups from an intermediate in ergosterol biosynthesis; mutants are sterol auxotrophs YLR100W S000004090
YMR173W	-	-	4.44766	DDR48	FSP DNA damage-responsive protein, expression is increased in response to heat-shock stress or treatments that produce DNA lesions; contains multiple repeats of the amino acid sequence NNNDSYGS Null mutant is viable, displays reduced spontaneous mutation rate YMR173W S000004784
YPR157W	-	-	4.41667		NO_MATCH
YDR269C	-	-	4.40828		NO_MATCH
YIL117C	-	-	4.40771	PRM5	Pheromone-regulated protein, predicted to have 1 transmembrane segment; induced during cell integrity signaling YIL117C S000001379
YEL071W	-	-	4.34509	DLD3	D-lactate dehydrogenase, part of the retrograde regulon which consists of genes whose expression is stimulated by damage to mitochondria and reduced in cells grown with glutamate as the sole nitrogen source, located in the cytoplasm YEL071W S000000797
YHR112C	-	-	4.34247		NO_MATCH
YDL110C	-	-	4.3324	TMA17	Protein of unknown function that associates with ribosomes YDL110C S000002268
YLR046C	-	-	4.30468		NO_MATCH
YDR274C	-	-	4.28209		NO_MATCH
YHL035C	-	-	4.26871	VMR1	Protein of unknown function that may interact with ribosomes, based on co-purification experiments; member of the ATP-binding cassette (ABC) family; potential Cdc28p substrate; detected in purified mitochondria in high-throughput studies Null: multidrug and cadmium sensitivity YHL035C S000001027
YHR175W	-	-	4.24258	CTR2	Putative low-affinity copper transporter of the vacuolar membrane; mutation confers resistance to toxic copper concentrations, while overexpression confers resistance to copper starvation ctr2 mutants display a high level of resistance to toxic copper concentrations. CTR2 overexpression provides increased resistance to copper starvation and is also associated with an increased sensitivity to copp…
YAR009C	-	-	4.19186		NO_MATCH
YKR049C	-	-	4.18872	FMP46	Putative redox protein containing a thioredoxin fold; the authentic, non-tagged protein is detected in highly purified mitochondria in high-throughput studies YKR049C S000001757
YOL053C-A	-	-	4.16351		NO_MATCH
YOR226C	-	+	4.06448	ISU2	NUA2 Conserved protein of the mitochondrial matrix, required for synthesis of mitochondrial and cytosolic iron-sulfur proteins, performs a scaffolding function in mitochondria during Fe/S cluster assembly; isu1 isu2 double mutant is inviable Null mutant is viable on YPD at 30 degrees C, and is synthetically lethal with isu1 null. YOR226C S000005752
YLR130C	-	-	4.06269	ZRT2	Low-affinity zinc transporter of the plasma membrane; transcription is induced under low-zinc conditions by the Zap1p transcription factor Null mutant is viable; ZRT2 overexpression increases rate of zinc uptake YLR130C S000004120
YIR033W	-	-	4.04545	MGA2	ER membrane protein involved in regulation of OLE1 transcription, acts with homolog Spt23p; inactive ER form dimerizes and one subunit is then activated by ubiquitin/proteasome-dependent processing followed by nuclear targeting Null mutant is viable, shows subtle effects on growth, UV sensitivity, and galactose utilization; mga2 spt23 double deletion mutants are inviable YIR033W S000001472
YNL259C	-	+	4.03109	ATX1	Cytosolic copper metallochaperone that transports copper to the secretory vesicle copper transporter Ccc2p for eventual insertion into Fet3p, which is a multicopper oxidase required for high-affinity iron uptake hypersensitive toward paraquat (a generator of superoxide anion) YNL259C S000005203
YKL120W	-	-	4.01431	OAC1	Mitochondrial inner membrane transporter, transports oxaloacetate, sulfate, and thiosulfate; member of the mitochondrial carrier family YKL120W S000001603
YFL026W	-	-	3.98243	STE2	Receptor for alpha-factor pheromone; seven transmembrane-domain GPCR that interacts with both pheromone and a heterotrimeric G protein to initiate the signaling response that leads to mating between haploid a and alpha cells YFL026W S000001868
YBR045C	-	-	3.94647	GIP1	Meiosis-specific regulatory subunit of the Glc7p protein phosphatase, regulates spore wall formation and septin organization, required for expression of some late meiotic genes and for normal localization of Glc7p YBR045C S000000249
YBL098W	-	-	3.94578	BNA4	Kynurenine 3-mono oxygenase, required for the de novo biosynthesis of NAD from tryptophan via kynurenine; expression regulated by Hst1p; putative therapeutic target for Huntington disease Null: Nicotinic acid auxotroph. Other phenotypes: Deletion of the gene is co-lethal with the deletion of NPT1 YBL098W S000000194
YAL067C	-	-	3.9005	SEO1	Putative permease, member of the allantoate transporter subfamily of the major facilitator superfamily; mutation confers resistance to ethionine sulfoxide YAL067C S000000062
YKR076W	-	-	3.85076	ECM4	GTO2 Omega class glutathione transferase; not essential; similar to Ygr154cp; green fluorescent protein (GFP)-fusion protein localizes to the cytoplasm A Tn3 insertion into this gene causes hypersensitivity to the cell surface polymer perturbing agent calcofluor white. YKR076W S000001784
YLR251W	-	-	3.83449	SYM1	Protein required for ethanol metabolism; induced by heat shock and localized to the inner mitochondrial membrane; homologous to mammalian peroxisomal membrane protein Mpv17 Null: fails to grow on ethanol or acetaldehyde at 37 degrees. Other phenotypes: partiallay respiration-defective at 37 degrees YLR251W S000004241
YDR263C	-	-	3.83374	DIN7	DIN3 Mitochondrial nuclease functioning in DNA repair and replication, modulates the stability of the mitochondrial genome, induced by exposure to mutagens, also induced during meiosis at a time nearly coincident with commitment to recombination YDR263C S000002671
YML056C	-	-	3.82832	IMD4	Inosine monophosphate dehydrogenase, catalyzes the first step of GMP biosynthesis, member of a four-gene family in S. cerevisiae, constitutively expressed YML056C S000004520
YML054C	-	-	3.8147	CYB2	Cytochrome b2 (L-lactate cytochrome-c oxidoreductase), component of the mitochondrial intermembrane space, required for lactate utilization; expression is repressed by glucose and anaerobic conditions Null mutant is viable but is deficient in cytochrome b2 and L-lactate dehydrogenase activity and is unable to use L-lactate as a sole carbon source YML054C S000004518
YML045W	-	-	3.80375		NO_MATCH
YPL111W	-	-	3.78798	CAR1	LPH15|cargA Arginase, responsible for arginine degradation, expression responds to both induction by arginine and nitrogen catabolite repression; disruption enhances freeze tolerance Null mutant is viable but defective in arginine catabolism YPL111W S000006032
YPL026C	-	-	3.77486	SKS1	SHA3 Putative serine/threonine protein kinase; involved in the adaptation to low concentrations of glucose independent of the SNF3 regulated pathway Null mutant is viable; Sks1 lacking the consensus ATP binding site cannot suppress snf3 mutants when overexpressed YPL026C S000005947
YOR316C	-	+	3.74078	COT1	Vacuolar transporter that mediates zinc transport into the vacuole; overexpression confers resistance to cobalt and rhodium Null mutant is viable, yet increased sensitivity to cobalt YOR316C S000005843
YGR088W	-	-	3.70682	CTT1	SPS101 Cytosolic catalase T, has a role in protection from oxidative damage by hydrogen peroxide Null mutant is viable and heat sensitive YGR088W S000003320
YDR366C	-	-	3.69762		NO_MATCH
YOR327C	-	-	3.6672	SNC2	Vesicle membrane receptor protein (v-SNARE) involved in the fusion between Golgi-derived secretory vesicles with the plasma membrane; member of the synaptobrevin/VAMP family of R-type v-SNARE proteins Null mutant is viable, snc1 snc2 double mutants are deficient in normal bulk secretion, accumulate large numbers of post-Golgi vesicles, and display a variety of conditional lethal phenotypes YOR327…
YML008C	-	-	3.64765	ERG6	ISE1|LIS1|SED6|VID1 Delta(24)-sterol C-methyltransferase, converts zymosterol to fecosterol in the ergosterol biosynthetic pathway by methylating position C-24; localized to both lipid particles and mitochondrial outer membrane The null mutant is viable, cannot methylate ergosterol precursors at C-24, and lacks ergosterol. The null mutant shows defective conjugation, diminished capacity for trans…
YLR271W	-	-	3.58471		NO_MATCH
YDL059C	-	-	3.56269	RAD59	Protein involved in the repair of double-strand breaks in DNA during vegetative growth via recombination and single-strand annealing; anneals complementary single-stranded DNA; homologous to Rad52p gamma-ray sensitivity, mitotic recombination defects. rad59 is epistatic to rad52 for its repair and recombination defects. YDL059C S000002217
YBR105C	-	-	3.53241	VID24	GID4 Peripheral membrane protein located at Vid (vacuole import and degradation) vesicles; regulates fructose-1,6-bisphosphatase (FBPase) targeting to the vacuole; involved in proteasome-dependent catabolite degradation of FBPase Null mutant is viable, defective in fructose-1,6-bisphosphatase dergadation YBR105C S000000309
YIL108W	-	-	3.52273		NO_MATCH
YNL237W	-	-	3.52124	YTP1	Probable type-III integral membrane protein of unknown function, has regions of similarity to mitochondrial electron transport proteins YNL237W S000005181
YLR220W	-	+	3.51869	CCC1	Putative vacuolar Fe2+/Mn2+ transporter; suppresses respiratory deficit of yfh1 mutants, which lack the ortholog of mammalian frataxin, by preventing mitochondrial iron accumulation Wild-type complements csg1 (calcium sensitive-group) mutants when overexpressed. Deletion of CCC1 results in decreased vacuolar iron content and decreased iron stores, which affect cytosolic iron levels and cell growt…
YJR103W	-	-	3.50476	URA8	Minor CTP synthase isozyme (see also URA7), catalyzes the ATP-dependent transfer of the amide nitrogen from glutamine to UTP, forming CTP, the final step in de novo biosynthesis of pyrimidines; involved in phospholipid biosynthesis Null mutant is viable. Double deletion of URA7, which also encodes CTP synthetase, and URA8 is lethal YJR103W S000003864
YOR184W	-	-	3.49508	SER1	ADE9 3-phosphoserine aminotransferase, catalyzes the formation of phosphoserine from 3-phosphohydroxypyruvate, required for serine and glycine biosynthesis; regulated by the general control of amino acid biosynthesis mediated by Gcn4p Null mutant is viable, serine-requiring YOR184W S000005710
YLR034C	-	+	3.47904	SMF3	Putative divalent metal ion transporter involved in iron homeostasis; transcriptionally regulated by metal ions; member of the Nramp family of metal transport proteins YLR034C S000004024
YGR177C	-	-	3.47564	ATF2	Alcohol acetyltransferase, may play a role in steroid detoxification; forms volatile esters during fermentation, which is important in brewing YGR177C S000003409
YLR101C	-	-	3.44731		NO_MATCH
YPL036W	-	+	3.43116	PMA2	Plasma membrane H+-ATPase, isoform of Pma1p, involved in pumping protons out of the cell; regulator of cytoplasmic pH and plasma membrane potential YPL036W S000005957
YMR184W	-	-	3.4269	ADD37	Protein of unknown function involved in ER-associated protein degradation; green fluorescent protein (GFP)-fusion protein localizes to the cytoplasm and is induced in response to the DNA-damaging agent MMS; YMR184W is not an essential gene YMR184W S000004796
YDR340W	-	-	3.41112		NO_MATCH
YDL170W	-	-	3.3732	UGA3	Transcriptional activator necessary for gamma-aminobutyrate (GABA)-dependent induction of GABA genes (such as UGA1, UGA2, UGA4); zinc-finger transcription factor of the Zn(2)-Cys(6) binuclear cluster domain type; localized to the nucleus Null mutant is viable but exhibits defects in activation of UGA1 and UGA4. YDL170W S000002329
YJL170C	-	-	3.35593	ASG7	Protein that regulates signaling from a G protein beta subunit Ste4p and its relocalization within the cell; specific to a-cells and induced by alpha-factor YJL170C S000003706
YOL002C	-	+	3.34775	IZH2	PHO36 Plasma membrane protein involved in zinc metabolism and osmotin-induced apoptosis; transcription regulated by Zap1p, zinc and fatty acid levels; similar to mammalian adiponectins; deletion increases sensitivity to elevated zinc YOL002C S000005362
YLR452C	-	-	3.34487	SST2	GTPase-activating protein for Gpa1p, regulates desensitization to alpha factor pheromone; also required to prevent receptor-independent signaling of the mating pathway; member of the RGS (regulator of G-protein signaling) family Null mutants are viable and exhibit increased sensitivity to mating factors YLR452C S000004444
YDR275W	-	-	3.33181	BSC2	Protein of unknown function, ORF exhibits genomic organization compatible with a translational readthrough-dependent mode of expression YDR275W S000002683
YFL041W	-	-	3.31256	FET5	Multicopper oxidase, integral membrane protein with similarity to Fet3p; may have a role in iron transport overexpression of FET5 suppresses a fet3 null mutant. YFL041W S000001853
YHR145C	-	-	3.31155		NO_MATCH
YLR035C-A	-	-	3.31067		NO_MATCH
YLR295C	-	-	3.28343	ATP14	Subunit h of the F0 sector of mitochondrial F1F0 ATP synthase, which is a large, evolutionarily conserved enzyme complex required for ATP synthesis unable to grow on glycerol medium; no detectable oligomycin-sensitive ATPase activity YLR295C S000004286
YKL150W	-	-	3.26105	MCR1	Mitochondrial NADH-cytochrome b5 reductase, involved in ergosterol biosynthesis YKL150W S000001633
YBL064C	-	-	3.24917	PRX1	Mitochondrial peroxiredoxin (1-Cys Prx) with thioredoxin peroxidase activity, has a role in reduction of hydroperoxides; induced during respiratory growth and under conditions of oxidative stress; phosphorylated YBL064C S000000160
YER159C	-	-	3.23139	BUR6	NCB1 Subunit of a heterodimeric NC2 transcription regulator complex with Ncb2p; complex binds to TBP and can repress transcription by preventing preinitiation complex assembly or stimulate activated transcription; homologous to human NC2alpha Null mutant is viable, but grows very poorly YER159C S000000961
YKL091C	-	-	3.23		NO_MATCH
YOL153C	-	-	3.22832		NO_MATCH
YOR222W	-	-	3.20207	ODC2	Mitochondrial inner membrane transporter, exports 2-oxoadipate and 2-oxoglutarate from the mitochondrial matrix to the cytosol for use in lysine and glutamate biosynthesis and in lysine catabolism YOR222W S000005748
YDR354W	-	-	3.19593	TRP4	Anthranilate phosphoribosyl transferase of the tryptophan biosynthetic pathway, catalyzes the phosphoribosylation of anthranilate, subject to the general control system of amino acid biosynthesis tryptophan requiring YDR354W S000002762
YJR104C	+	+	3.16181	SOD1	CRS4 Cytosolic superoxide dismutase; some mutations are analogous to those that cause ALS (amyotrophic lateral sclerosis) in humans Null mutant is viable; dioxygen and paraquat sensitive; fails to grow on lactate as a carbon source; exhibits increased copper sensitivity; exhibits slower proliferation time due to increased length of G1; methionine auxotroph and oxygen sensitive; SOD1 is required f…
YDR043C	-	-	3.16095	NRG1	Transcriptional repressor that recruits the Cyc8p-Tup1p complex to promoters; mediates glucose repression and negatively regulates a variety of processes including filamentous growth and alkaline pH response Null mutant is viable, relieves glucose repression of SUC2 and STA1; suppresses snf mutations YDR043C S000002450
YOR225W	-	-	3.15616		NO_MATCH
YBR187W	-	-	3.15365	GDT1	Putative protein of unknown function; expression is reduced in a gcr1 null mutant; GFP-fusion protein localizes to the vacuole; expression pattern and physical interactions suggest a possible role in ribosome biogenesis YBR187W S000000391
YOR065W	-	-	3.1392	CYT1	CTC1|YOR29-16 Cytochrome c1, component of the mitochondrial respiratory chain; expression is regulated by the heme-activated, glucose-repressed Hap2p/3p/4p/5p CCAAT-binding complex YOR065W S000005591
YDL130W-A	-	-	3.11988	STF1	AIS2 Protein involved in regulation of the mitochondrial F1F0-ATP synthase; Stf1p and Stf2p act as stabilizing factors that enhance inhibitory action of the Inh1p protein YDL130W-A S000007232
YPL199C	-	-	3.1072		NO_MATCH
YMR050C	-	-	3.10666		NO_MATCH
YJL017W	-	-	3.10371		NO_MATCH
YML128C	-	-	3.05213	MSC1	Protein of unknown function; mutant is defective in directing meiotic recombination events to homologous chromatids; the authentic, non-tagged protein is detected in highly purified mitochondria and is phosphorylated YML128C S000004597
YMR215W	-	-	3.02813	GAS3	Putative 1,3-beta-glucanosyltransferase, has similarity to Gas1p; localizes to the cell wall YMR215W S000004828
YLR120C	-	-	3.02485	YPS1	YAP3 Aspartic protease, attached to the plasma membrane via a glycosylphosphatidylinositol (GPI) anchor Null mutant is viable, defective in expression of somatostatin-28; yps1 mkc7 double disruptants are temperature sensitive; yps1 mkc7 kex2 mutants are profoundly temperature sensitive and are cold sensitive YLR120C S000004110
YEL011W	-	-	3.0087	GLC3	GHA1 Glycogen branching enzyme, involved in glycogen accumulation; green fluorescent protein (GFP)-fusion protein localizes to the cytoplasm in a punctate pattern Null mutant is viable, glycogen deficient YEL011W S000000737
YJR008W	-	-	3.00738		NO_MATCH
YJL157C	-	-	2.99992	FAR1	Cyclin-dependent kinase inhibitor that mediates cell cycle arrest in response to pheromone; also forms a complex with Cdc24p, Ste4p, and Ste18p that may specify the direction of polarized growth during mating; potential Cdc28p substrate YJL157C S000003693
YOR377W	-	-	2.99645	ATF1	Alcohol acetyltransferase with potential roles in lipid and sterol metabolism; responsible for the major part of volatile acetate ester production during fermentation YOR377W S000005904
YLR142W	-	-	2.98744	PUT1	Proline oxidase, nuclear-encoded mitochondrial protein involved in utilization of proline as sole nitrogen source; PUT1 transcription is induced by Put3p in the presence of proline and the absence of a preferred nitrogen source inability to use proline as a nitrogen source YLR142W S000004132
YOR120W	-	-	2.98282	GCY1	GCY Putative NADP(+) coupled glycerol dehydrogenase, proposed to be involved in an alternative pathway for glycerol catabolism; member of the aldo-keto reductase (AKR) family YOR120W S000005646
YGL184C	-	-	2.97785	STR3	Cystathionine beta-lyase, converts cystathionine into homocysteine Null mutant is viable but unable to turn cysteine into homocysteine. No growth when supplied with cystathionine. YGL184C S000003152
YAL060W	-	-	2.96181	BDH1	NAD-dependent (R,R)-butanediol dehydrogenase, catalyzes oxidation of (R,R)-2,3-butanediol to (3R)-acetoin, oxidation of meso-butanediol to (3S)-acetoin, and reduction of acetoin; enhances use of 2,3-butanediol as an aerobic carbon source YAL060W S000000056
YBR012C	-	-	2.95171		NO_MATCH
YMR258C	-	-	2.94163		NO_MATCH
YFL002W-A	-	-	2.93428		NO_MATCH
YBR248C	-	-	2.92904	HIS7	Imidazole glycerol phosphate synthase (glutamine amidotransferase:cyclase), catalyzes the fifth and sixth steps of histidine biosynthesis and also produces 5-aminoimidazole-4-carboxamide ribotide (AICAR), a purine precursor Null mutant is viable and requires histidine YBR248C S000000452
YMR110C	-	-	2.92716	HFD1	Putative fatty aldehyde dehydrogenase, located in the mitochondrial outer membrane and also in lipid particles; has similarity to human fatty aldehyde dehydrogenase (FALDH) which is implicated in Sjogren-Larsson syndrome YMR110C S000004716
YCL027W	-	-	2.92634	FUS1	Membrane protein localized to the shmoo tip, required for cell fusion; expression regulated by mating pheromone; proposed to coordinate signaling, fusion, and polarization events required for fusion; potential Cdc28p substrate Null mutant is viable; in fus1 x fus1 matings there is an interruption of the mating process just before cytoplasmic fusion YCL027W S000000532
YNL066W	-	-	2.92289	SUN4	SCW3 Cell wall protein related to glucanases, possibly involved in cell wall septation; member of the SUN family YNL066W S000005010
YDL222C	-	-	2.9202	FMP45	Integral membrane protein localized to mitochondria (untagged protein) and eisosomes, immobile patches at the cortex associated with endocytosis; sporulation and sphingolipid content are altered in mutants; has homologs SUR7 and YNL194C YDL222C S000002381
YFR047C	-	-	2.91758	BNA6	QPT1 Quinolinate phosphoribosyl transferase, required for the de novo biosynthesis of NAD from tryptophan via kynurenine; expression regulated by Hst1p Null: Nicotinic acid auxotroph. Other phenotypes: Deletion of the gene is co-lethal with the deletion of NPT1 YFR047C S000001943
YNR009W	-	-	2.90634	NRM1	Transcriptional co-repressor of MBF (MCB binding factor)-regulated gene expression; Nrm1p associates stably with promoters via MBF to repress transcription upon exit from G1 phase YNR009W S000005292
YDR461W	-	-	2.8914	MFA1	Mating pheromone a-factor, made by a cells; interacts with alpha cells to induce cell cycle arrest and other responses leading to mating; biogenesis involves C-terminal modification, N-terminal proteolysis, and export; also encoded by MFA2 YDR461W S000002869
YJL145W	-	-	2.86916	SFH5	Putative phosphatidylinositol transfer protein (PITP), exhibits phosphatidylinositol- but not phosphatidylcholine-transfer activity, localized to cytosol and microsomes, similar to Sec14p; may be PITP regulator rather than actual PITP YJL145W S000003681
YOR355W	-	-	2.82712	GDS1	Protein of unknown function, required for growth on glycerol as a carbon source; the authentic, non-tagged protein is detected in highly purified mitochondria in high-throughput studies Null mutant is viable, shows partial impairment of growth on medium containing glycerol as the carbon source. Overexpxression suppresses NAM9-1 glycerol deficient phenotype YOR355W S000005882
YDR074W	-	-	2.80181	TPS2	HOG2|PFK3 Phosphatase subunit of the trehalose-6-phosphate synthase/phosphatase complex, which synthesizes the storage carbohydrate trehalose; expression is induced by stress conditions and repressed by the Ras-cAMP pathway Null mutant is viable, exhibits complete loss of trehalose-6-phosphate phosphatase activity, measured in vitro, and accumulation of excessive amounts of trehalose-6-phosphate …
YMR175W	-	-	2.78904	SIP18	Protein of unknown function whose expression is induced by osmotic stress YMR175W S000004787
YJL161W	-	-	2.78232	FMP33	Putative protein of unknown function; the authentic, non-tagged protein is detected in highly purified mitochondria in high-throughput studies YJL161W S000003697
YBL078C	-	-	2.78079	ATG8	APG8|AUT7|CVT5 Protein required for autophagy; modified by the serial action of Atg4p, Atg7p, and Atg3p, and conjugated at the C terminus with phosphatidylethanolamine, to become the form essential for generation of autophagosomes Null mutant is viable but lacks autophagocytosis and is unable to sporulate. AUT7 is a suppressor of mutant phenotypes of aut2-1 cells. Uptake of precursor Aminopeptida…
YMR199W	-	-	2.76378	CLN1	G1 cyclin involved in regulation of the cell cycle; activates Cdc28p kinase to promote the G1 to S phase transition; late G1 specific expression depends on transcription factor complexes, MBF (Swi6p-Mbp1p) and SBF (Swi6p-Swi4p) Null mutant is viable, exhibits G1 arrest YMR199W S000004812
YDR278C	-	-	2.76375		NO_MATCH
YBR012W-B	-	-	2.76092		NO_MATCH
YIL136W	-	-	2.75274	OM45	Protein of unknown function, major constituent of the mitochondrial outer membrane; located on the outer (cytosolic) face of the outer membrane Null mutant is viable and shows normal growth, viability, mitochondrial function and mitochondrial protein import YIL136W S000001398
YMR322C	-	-	2.75067	SNO4	HSP34 Possible chaperone and cysteine protease with similarity to E. coli Hsp31 and S. cerevisiae Hsp31p, Hsp32p, and Hsp33p; member of the DJ-1/ThiJ/PfpI superfamily; may have a role in pyridoxine metabolism YMR322C S000004941
YLR252W	-	-	2.70746		NO_MATCH
YML004C	-	-	2.69549	GLO1	Monomeric glyoxalase I, catalyzes the detoxification of methylglyoxal (a by-product of glycolysis) via condensation with glutathione to produce S-D-lactoylglutathione; expression regulated by methylglyoxal levels and osmotic stress YML004C S000004463
YDR218C	-	-	2.6613	SPR28	Sporulation-specific homolog of the yeast CDC3/10/11/12 family of bud neck microfilament genes; meiotic septin expressed at high levels during meiotic divisions and ascospore formation YDR218C S000002626
YCL035C	-	-	2.64505	GRX1	Hydroperoxide and superoxide-radical responsive heat-stable glutathione-dependent disulfide oxidoreductase with active site cysteine pair; protects cells from oxidative damage Null mutant is viable but sensitive to oxidative stress. grx1 grx2 null mutants are viable but lack heat-stable oxidoreductase activity. YCL035C S000000540
YLL041C	-	-	2.63561	SDH2	ACN17 Iron-sulfur protein subunit of succinate dehydrogenase (Sdh1p, Sdh2p, Sdh3p, Sdh4p), which couples the oxidation of succinate to the transfer of electrons to ubiquinone YLL041C S000003964
YPR138C	-	-	2.6296	MEP3	Ammonium permease of high capacity and low affinity; belongs to a ubiquitous family of cytoplasmic membrane proteins that transport only ammonium (NH4+); expression is under the nitrogen catabolite repression regulation ammonia permease Null mutant is viable. mep1 mep2 mep3 triple mutants cannot grow on media containing less than 5mM NH4+ as the sole nitrogen source YPR138C S000006342
YNL276C	-	-	2.62928		NO_MATCH
YJR148W	-	-	2.62864	BAT2	ECA40|TWT2 Cytosolic branched-chain amino acid aminotransferase, homolog of murine ECA39; highly expressed during stationary phase and repressed during logarithmic phase YJR148W S000003909
YNR057C	-	-	2.59171	BIO4	Dethiobiotin synthetase, catalyzes the third step in the biotin biosynthesis pathway; BIO4 is in a cluster of 3 genes (BIO3, BIO4, and BIO5) that mediate biotin synthesis; expression appears to be repressed at low iron levels YNR057C S000005340
YOL164W	-	-	2.57313	BDS1	Bacterially-derived sulfatase required for use of alkyl- and aryl-sulfates as sulfur sources YOL164W S000005524
YER073W	-	-	2.55897	ALD5	Mitochondrial aldehyde dehydrogenase, involved in regulation or biosynthesis of electron transport chain components and acetate formation; activated by K+; utilizes NADP+ as the preferred coenzyme; constitutively expressed YER073W S000000875
YDR343C	-	-	2.5589	HXT6	High-affinity glucose transporter of the major facilitator superfamily, nearly identical to Hxt7p, expressed at high basal levels relative to other HXTs, repression of expression by high glucose requires SNF3 Null mutant is viable; snf3 hxt1 hxt2 hxt3 hxt4 hxt6 hxt7 mutant cannot grow on media containing glucose as sole carbon source YDR343C S000002751
YGR065C	-	-	2.54103	VHT1	High-affinity plasma membrane H+-biotin (vitamin H) symporter; mutation results in fatty acid auxotrophy; 12 transmembrane domain containing major facilitator subfamily member; mRNA levels negatively regulated by iron deprivation and biotin reduced biotin uptake, reduced levels of protein biotinylation YGR065C S000003297
YEL024W	-	-	2.53196	RIP1	Ubiquinol-cytochrome-c reductase, a Rieske iron-sulfur protein of the mitochondrial cytochrome bc1 complex; transfers electrons from ubiquinol to cytochrome c1 during respiration YEL024W S000000750
YDR271C	-	-	2.52856		NO_MATCH
YLL055W	-	-	2.51355	YCT1	High-affinity cysteine-specific transporter with similarity to the Dal5p family of transporters; green fluorescent protein (GFP)-fusion protein localizes to the endoplasmic reticulum; YCT1 is not an essential gene YLL055W S000003978
YDL020C	-	-	2.51149	RPN4	SON1|UFD5 Transcription factor that stimulates expression of proteasome genes; Rpn4p levels are in turn regulated by the 26S proteasome in a negative feedback control mechanism; RPN4 is transcriptionally regulated by various stress responses Null mutant is viable, exhibits synthetic interactions with sen3, sun1, and cdc28-1N YDL020C S000002178
YBL045C	-	-	2.51074	COR1	QCR1 Core subunit of the ubiquinol-cytochrome c reductase complex (bc1 complex), which is a component of the mitochondrial inner membrane electron transport chain deficiency in cytochrome b; slow growth on glycerol YBL045C S000000141
YAR075W	-	-	2.48663		NO_MATCH
YLR432W	-	-	2.48333	IMD3	Inosine monophosphate dehydrogenase, catalyzes the first step of GMP biosynthesis, member of a four-gene family in S. cerevisiae, constitutively expressed YLR432W S000004424
YKR057W	-	-	2.48231	RPS21A	RPS25 Protein component of the small (40S) ribosomal subunit; nearly identical to Rps21Bp and has similarity to rat S21 ribosomal protein YKR057W S000001765
YPR160W	-	-	2.48185	GPH1	Non-essential glycogen phosphorylase required for the mobilization of glycogen, activity is regulated by cyclic AMP-mediated phosphorylation, expression is regulated by stress-response elements and by the HOG MAP kinase pathway Null mutant is viable; haploid cells contain higher levels of intracellular glycogen YPR160W S000006364
YGL032C	-	-	2.47224	AGA2	Adhesion subunit of a-agglutinin of a-cells, C-terminal sequence acts as a ligand for alpha-agglutinin (Sag1p) during agglutination, modified with O-linked oligomannosyl chains, linked to anchorage subunit Aga1p via two disulfide bonds YGL032C S000003000
YPR078C	-	-	2.43991		NO_MATCH
YLR049C	-	-	2.42953		NO_MATCH
YDR237W	-	-	2.42559	MRPL7	Mitochondrial ribosomal protein of the large subunit YDR237W S000002645
NORF10	-	-	2.4239		NO_MATCH
YOL149W	-	-	2.42216	DCP1	Subunit of the Dcp1p-Dcp2p decapping enzyme complex, which removes the 5' cap structure from mRNAs prior to their degradation; enhances the activity of catalytic subunit Dcp2p; regulated by DEAD box protein Dhh1p Null mutant is inviable in the FY1679 background, but viable, though grows slowly, in the CEN.PK141 background. YOL149W S000005509
YHR001W-A	-	-	2.40584	QCR10	Subunit of the ubiqunol-cytochrome c oxidoreductase complex which includes Cobp, Rip1p, Cyt1p, Cor1p, Qcr2p, Qcr6p, Qcr7p, Qcr8p, Qcr9p, and Qcr10p and comprises part of the mitochondrial respiratory chain Null mutant is viable, even on nonfermentable carbon sources, but shows reduced ubiquinol-cytochrome c oxidoreductase activity and loss of Rieske iron-sulfur protein from the complex; qcr10 mut…
YIL097W	-	-	2.40528	FYV10	GID9 Protein of unknown function, required for survival upon exposure to K1 killer toxin; involved in proteasome-dependent catabolite inactivation of fructose-1,6-bisphosphatase; contains CTLH domain Null mutant is viable but exhibits K1 killer toxin hypersensitivity. YIL097W S000001359
YGL187C	-	-	2.37863	COX4	Subunit IV of cytochrome c oxidase, which is the terminal member of the mitochondrial inner membrane electron transport chain; N-terminal 25 residues of precursor are cleaved during mitochondrial import; phosphorylated YGL187C S000003155
YDL124W	-	-	2.36452		NO_MATCH
YGR138C	-	-	2.3591	TPO2	Polyamine transport protein specific for spermine; localizes to the plasma membrane; transcription of TPO2 is regulated by Haa1p; member of the major facilitator superfamily YGR138C S000003370
YPL024W	-	-	2.35441	RMI1	NCE4 Involved in response to DNA damage; null mutants have increased rates of recombination and delayed S phase; interacts physically and genetically with Sgs1p (RecQ family member) and Top3p (topoisomerase III) Null mutant is viable and suppresses the failure of an ace2 null to activate CTS1; also grows slowly at 37 C YPL024W S000005945
YDR222W	-	-	2.34519		NO_MATCH
YFL057C	-	-	2.32518	AAD16	Putative aryl-alcohol dehydrogenase with similarity to P. chrysosporium aryl-alcohol dehydrogenase; mutational analysis has not yet revealed a physiological role YFL057C S000001837
YOR187W	-	-	2.30929	TUF1	Mitochondrial translation elongation factor Tu; comprises both GTPase and guanine nucleotide exchange factor activities, while these activities are found in separate proteins in S. pombe and humans Null mutant is viable, blocks mitochondrial translation and destabilizes mitochondrial genome. YOR187W S000005713
YLR112W	-	-	2.30111		NO_MATCH
YLL012W	-	-	2.29279	YEH1	Steryl ester hydrolase, one of three gene products (Yeh1p, Yeh2p, Tgl1p) responsible for steryl ester hydrolase activity and involved in sterol homeostasis; localized to lipid particle membranes YLL012W S000003935
YGR108W	-	-	2.27251	CLB1	SCB1 B-type cyclin involved in cell cycle progression; activates Cdc28p to promote the transition from G2 to M phase; accumulates during G2 and M, then targeted via a destruction box motif for ubiquitin-mediated degradation by the proteasome YGR108W S000003340
YOR232W	-	-	2.23865	MGE1	GRPE|YGE1 Protein of the mitochondrial matrix involved in protein import into mitochondria; acts as a cochaperone and a nucleotide release factor for Ssc1p; homolog of E. coli GrpE YOR232W S000005758
YJL166W	-	-	2.23783	QCR8	COR5 Subunit 8 of ubiquinol cytochrome-c reductase complex, which is a component of the mitochondrial inner membrane electron transport chain; oriented facing the intermembrane space; expression is regulated by Abf1p and Cpf1p YJL166W S000003702
YCL025C	-	-	2.23408	AGP1	YCC5 Low-affinity amino acid permease with broad substrate range, involved in uptake of asparagine, glutamine, and other amino acids; expression is regulated by the SPS plasma membrane amino acid sensor system (Ssy1p-Ptr3p-Ssy5p) Null mutant is viable; resistant to the amino acid analog gamma-hydroxyaspartate, decreased growth on asn, gln and some other amino acids in strains in which Gap1 and Gn…
YMR145C	-	-	2.22972	NDE1	NDH1 Mitochondrial external NADH dehydrogenase, a type II NAD(P)H:quinone oxidoreductase that catalyzes the oxidation of cytosolic NADH; Nde1p and Nde2p provide cytosolic NADH to the mitochondrial respiratory chain YMR145C S000004753
YML126C	-	-	2.2102	ERG13	HMGS 3-hydroxy-3-methylglutaryl-CoA (HMG-CoA) synthase, catalyzes the formation of HMG-CoA from acetyl-CoA and acetoacetyl-CoA; involved in the second step in mevalonate biosynthesis YML126C S000004595
YMR271C	-	-	2.19884	URA10	One of two orotate phosphoribosyltransferase isozymes (see also URA5) that catalyze the fifth enzymatic step in the de novo biosynthesis of pyrimidines, converting orotate into orotidine-5'-phosphate YMR271C S000004884
YER069W	-	-	2.17704	ARG5,6	Protein that is processed in the mitochondrion to yield acetylglutamate kinase and N-acetyl-gamma-glutamyl-phosphate reductase, which catalyze the 2nd and 3rd steps in arginine biosynthesis; enzymes form a complex with Arg2p Arginine requiring YER069W S000000871
YBR054W	-	-	2.16814	YRO2	Putative protein of unknown function; the authentic, non-tagged protein is detected in a phosphorylated state in highly purified mitochondria in high-throughput studies; transcriptionally regulated by Haa1p YBR054W S000000258
YJL016W	-	-	2.15187		NO_MATCH
YHR138C	-	-	2.14474		NO_MATCH
YDL227C	-	-	2.13428	HO	Site-specific endonuclease required for gene conversion at the MAT locus (homothallic switching) through the generation of a ds DNA break; expression restricted to mother cells in late G1 as controlled by Swi4p-Swi6p, Swi5p and Ash1p Null mutant is viable and cannot undergo mating type switching YDL227C S000002386
YKL216W	-	-	2.13196	URA1	Dihydroorotate dehydrogenase, catalyzes the fourth enzymatic step in the de novo biosynthesis of pyrimidines, converting dihydroorotic acid into orotic acid uracil requiring YKL216W S000001699
YOR391C	-	-	2.13159	HSP33	Possible chaperone and cysteine protease with similarity to E. coli Hsp31 and S. cerevisiae Hsp31p, Hsp32p, and Sno4p; member of the DJ-1/ThiJ/PfpI superfamily, which includes human DJ-1 involved in Parkinson's disease YOR391C S000005918
YGR131W	-	-	2.12357		NO_MATCH
YMR107W	-	-	2.12069	SPG4	Protein required for survival at high temperature during stationary phase; not required for growth on nonfermentable carbon sources YMR107W S000004713
YOR360C	-	-	2.11963	PDE2	SRA5 High-affinity cyclic AMP phosphodiesterase, component of the cAMP-dependent protein kinase signaling system, protects the cell from extracellular cAMP, contains readthrough motif surrounding termination codon null suppresses the heat-shock and starvation phenotypes of ras2Val119 mutation and of the ras1 ras2 double mutant; null by itself shows slow growth in presence of external cAMP, and is…
YNL145W	-	-	2.10891	MFA2	Mating pheromone a-factor, made by a cells; interacts with alpha cells to induce cell cycle arrest and other responses leading to mating; biogenesis involves C-terminal modification, N-terminal proteolysis, and export; also encoded by MFA1 MATa cells having deletions of the a-factor structural genes (mfa1 mfa2 mutants) are capable of mating w/wild-type MAT alpha cells in the presence of exogenous…
YDR481C	-	-	2.10811	PHO8	phoH Repressible alkaline phosphatase, a glycoprotein localized to the vacuole; regulated by levels of inorganic phosphate and by a system consisting of Pho4p, Pho9p, Pho80p, Pho81p and Pho85p; dephosphorylates phosphotyrosyl peptides phosphatase deficient YDR481C S000002889
YJR016C	-	-	2.10079	ILV3	Dihydroxyacid dehydratase, catalyzes third step in the common pathway leading to biosynthesis of branched-chain amino acids Null mutant is viable and requires isoleucine and valine YJR016C S000003777
YJL089W	-	-	2.10031	SIP4	C6 zinc cluster transcriptional activator that binds to the carbon source-responsive element (CSRE) of gluconeogenic genes; involved in the positive regulation of gluconeogenesis; regulated by Snf1p protein kinase; localized to the nucleus YJL089W S000003625
YOL119C	-	-	2.09287	MCH4	Protein with similarity to mammalian monocarboxylate permeases, which are involved in transport of monocarboxylic acids across the plasma membrane; mutant is not deficient in monocarboxylate transport YOL119C S000005479
YML061C	-	-	2.06712	PIF1	TST1 DNA helicase involved in telomere formation and elongation; acts as a catalytic inhibitor of telomerase; also plays a role in repair and recombination of mitochondrial DNA Mitochondrial DNA is heat-labile; abnormal telomere formation YML061C S000004526
YDR091C	-	-	2.06564	RLI1	Essential iron-sulfur protein required for ribosome biogenesis and translation initiation; facilitates binding of a multifactor complex (MFC) of translation initiation factors to the small ribosomal subunit; predicted ABC family ATPase Null mutant is inviable; overexpression of RLI1 from a galactose-inducible promoter has a moderate inhibitory effect on growth. YDR091C S000002498
YML130C	-	-	2.06557	ERO1	Thiol oxidase required for oxidative protein folding in the endoplasmic reticulum Null mutant is inviable; in ero1-1(ts) mutants newly synthesized carboxypeptidase Y is retained in the ER and lacks disulfide bonds; ero1 mutants are hypersensitive to to the reductant DTT, whereas overexpression of ERO1 confers resistance to DTT, the oxidant diamide can restore growth and secretion in ero1 mutants …
YNR044W	-	-	2.05075	AGA1	Anchorage subunit of a-agglutinin of a-cells, highly O-glycosylated protein with N-terminal secretion signal and C-terminal signal for addition of GPI anchor to cell wall, linked to adhesion subunit Aga2p via two disulfide bonds mating defect in liquid medium YNR044W S000005327
YMR267W	-	-	2.04996	PPA2	IPP2 Mitochondrial inorganic pyrophosphatase, required for mitochondrial function and possibly involved in energy generation from inorganic pyrophosphate Null mutant is viable but is unable to grow on respiratory carbon sources and lacks mitochondrial DNA YMR267W S000004880
YDR541C	-	-	2.03907		NO_MATCH
YKL151C	-	-	2.0344		NO_MATCH
YLR058C	-	-	2.0311	SHM2	SHMT2 Cytosolic serine hydroxymethyltransferase, converts serine to glycine plus 5,10 methylenetetrahydrofolate; major isoform involved in generating precursors for purine, pyrimidine, amino acid, and lipid biosynthesis YLR058C S000004048
YCLX11W	-	-	2.02636		NO_MATCH
YER055C	-	-	2.02051	HIS1	ATP phosphoribosyltransferase, a hexameric enzyme, catalyzes the first step in histidine biosynthesis; mutations cause histidine auxotrophy and sensitivity to Cu, Co, and Ni salts; transcription is regulated by general amino acid control Null mutant is viable and requires histidine YER055C S000000857
YJL070C	-	-	2.01734		NO_MATCH
YLR302C	-	-	2.00045		NO_MATCH
YKL141W	-	-	1.9991	SDH3	CYB3|YKL4 Cytochrome b subunit of succinate dehydrogenase (Sdh1p, Sdh2p, Sdh3p, Sdh4p), which couples the oxidation of succinate to the transfer of electrons to ubiquinone Null mutant is viable, has impaired mitochondrial function, fails to grow on non-fermentable carbon sources YKL141W S000001624
YOR010C	-	-	1.99847	TIR2	SRP2 Putative cell wall mannoprotein of the Srp1p/Tip1p family of serine-alanine-rich proteins; transcription is induced by cold shock and anaerobiosis YOR010C S000005536
YMR243C	-	+	1.99301	ZRC1	OSR1 Vacuolar membrane zinc transporter, transports zinc from the cytosol into the vacuole for storage; also has a role in resistance to zinc shock resulting from a sudden influx of zinc into the cytoplasm Null mutant is viable and sensitive to zinc YMR243C S000004856
YKL202W	-	-	1.98612		NO_MATCH
YIL116W	-	-	1.97742	HIS5	Histidinol-phosphate aminotransferase, catalyzes the seventh step in histidine biosynthesis; responsive to general control of amino acid biosynthesis; mutations cause histidine auxotrophy and sensitivity to Cu, Co, and Ni salts Null mutant is viable and requires histidine YIL116W S000001378
YDR391C	-	-	1.96264		NO_MATCH
YHR104W	-	-	1.94567	GRE3	Aldose reductase involved in methylglyoxal, d-xylose and arabinose metabolism; stress induced (osmotic, ionic, oxidative, heat shock, starvation and heavy metals); regulated by the HOG pathway YHR104W S000001146
YPL279C	-	-	1.94175		NO_MATCH
YDR342C	-	-	1.93996	HXT7	High-affinity glucose transporter of the major facilitator superfamily, nearly identical to Hxt6p, expressed at high basal levels relative to other HXTs, expression repressed by high glucose levels Null mutant is viable; snf3 hxt1 hxt2 hxt3 hxt4 HXT7 hxt7 mutant cannot grow on media containing glucose as sole carbon source YDR342C S000002750
YBR083W	-	-	1.93953	TEC1	ROC1 Transcription factor required for full Ty1 epxression, Ty1-mediated gene activation, and haploid invasive and diploid pseudohyphal growth; TEA/ATTS DNA-binding domain family member YBR083W S000000287
YGL008C	+	+	1.93431	PMA1	Plasma membrane H+-ATPase, pumps protons out of the cell; major regulator of cytoplasmic pH and plasma membrane potential; part of the P2 subgroup of cation-transporting ATPases inviable; pma1 mutants are resistant to Dio-9, ethidium bromide and guanidine derivatives YGL008C S000002976
YPL198W	-	-	1.9193	RPL7B	Protein component of the large (60S) ribosomal subunit, nearly identical to Rpl7Ap and has similarity to E. coli L30 and rat L7 ribosomal proteins; contains a conserved C-terminal Nucleic acid Binding Domain (NDB2) Null mutant is viable; disruption of both RPL7A and RPL7B is lethal YPL198W S000006119
YMR196W	-	-	1.91408		NO_MATCH
YDR513W	-	-	1.90443	GRX2	TTR1 Cytoplasmic glutaredoxin, thioltransferase, glutathione-dependent disulfide oxidoreductase involved in maintaining redox state of target proteins, also exhibits glutathione peroxidase activity, expression induced in response to stress YDR513W S000002921
YOL104C	-	-	1.89526	NDJ1	TAM1 Meiosis-specific telomere protein, required for bouquet formation, effective homolog pairing, ordered cross-over distribution (interference), sister chromatid cohesion at meiotic telomeres, and segregation of small chromosomes Null allele exhibits errors in meiotic chromosome segregation about 10-fold higher than the wild-type error rate. Spore viability of homozygous diploids with the null …
YKL008C	-	-	1.89178	LAC1	DGT1 Ceramide synthase component, involved in synthesis of ceramide from C26(acyl)-coenzyme A and dihydrosphingosine or phytosphingosine, functionally equivalent to Lag1p Null mutant is viable but exhibits synthetic lethality with mutations in lag1. YKL008C S000001491
YKL224C	-	-	1.88966	PAU16	Putative protein of unknown function YKL224C S000001707
YNL134C	-	-	1.8845		NO_MATCH
YMR012W	-	-	1.88071	CLU1	TIF31 eIF3 component of unknown function; deletion causes defects in mitochondrial organization but not in growth or translation initiation, can rescue cytokinesis and mitochondrial organization defects of the Dictyostelium cluA- mutant Null mutant is viable, growth is normal, mitochondrial network is collapsed to one side of the cell YMR012W S000004614
YDR377W	-	-	1.87728	ATP17	Subunit f of the F0 sector of mitochondrial F1F0 ATP synthase, which is a large, evolutionarily conserved enzyme complex required for ATP synthesis No growth on glycerol YDR377W S000002785
YGL253W	-	-	1.86937	HXK2	HEX1|HKB|SCI2 Hexokinase isoenzyme 2 that catalyzes phosphorylation of glucose in the cytosol; predominant hexokinase during growth on glucose; functions in the nucleus to repress expression of HXK1 and GLK1 and to induce expression of its own gene Null mutant is viable and can ferment fructose, but fails to show glucose repression at SUC2, CYC1, GAL10. hxk1, hxk2 double null mutant cannot fermen…
YPL053C	-	-	1.86862	KTR6	MNN6 Probable mannosylphosphate transferase involved in the synthesis of core oligosaccharides in protein glycosylation pathway; member of the KRE2/MNT1 mannosyltransferase family Null mutant is viable, hypersensitive to Calcofluor White and hygromycin B; shows less binding to Alcian blue, and diminished mannosylphosphate transferase activity toward the ER core oligosaccharide acceptors, displays…
YGR010W	-	-	1.86846	NMA2	Nicotinic acid mononucleotide adenylyltransferase, involved in de novo and salvage synthesis of NAD(+) Null: viable. Other phenotypes: 2 or more copies increase rDNA and telomeric silencing YGR010W S000003242
YHR179W	-	-	1.85859	OYE2	Widely conserved NADPH oxidoreductase containing flavin mononucleotide (FMN), homologous to Oye3p with slight differences in ligand binding and catalytic properties; may be involved in sterol metabolism YHR179W S000001222
YGR154C	-	-	1.85851	GTO1	Omega-class glutathione transferase; induced under oxidative stress; putative peroxisomal localization YGR154C S000003386
YHL028W	-	-	1.85481	WSC4	YFW1|YHC8 ER membrane protein involved in the translocation of soluble secretory proteins and insertion of membrane proteins into the ER membrane; may also have a role in the stress response but has only partial functional overlap with WSC1-3 YHL028W S000001020
YBR040W	-	-	1.85463	FIG1	Integral membrane protein required for efficient mating; may participate in or regulate the low affinity Ca2+ influx system, which affects intracellular signaling and cell-cell fusion during mating Null mutant is viable, deficient in mating YBR040W S000000244
YNL040W	-	-	1.84683		NO_MATCH
YLR083C	-	-	1.8286	EMP70	p24a Protein whose 24kDa cleavage product is found in endosome-enriched membrane fractions, predicted to be a transmembrane protein YLR083C S000004073
YER131W	-	-	1.82139	RPS26B	Protein component of the small (40S) ribosomal subunit; nearly identical to Rps26Ap and has similarity to rat S26 ribosomal protein YER131W S000000933
YDR001C	-	-	1.82026	NTH1	Neutral trehalase, degrades trehalose; required for thermotolerance and may mediate resistance to other cellular stresses; may be phosphorylated by Cdc28p YDR001C S000002408
YPL273W	-	-	1.81596	SAM4	S-adenosylmethionine-homocysteine methyltransferase, functions along with Mht1p in the conversion of S-adenosylmethionine (AdoMet) to methionine to control the methionine/AdoMet ratio Slow growth on S-adenosylmethionine used as a sulfur source YPL273W S000006194
YDL198C	-	+	1.79989	GGC1	YHM1 Mitochondrial GTP/GDP transporter, essential for mitochondrial genome maintenance; has a role in mitochondrial iron transport; member of the mitochondrial carrier family Null mutant is viable; shm1 abf2 double deletion cannot grow on glycerol YDL198C S000002357
YOR303W	-	-	1.79346	CPA1	Small subunit of carbamoyl phosphate synthetase, which catalyzes a step in the synthesis of citrulline, an arginine precursor; translationally regulated by an attenuator peptide encoded by YOR302W within the CPA1 mRNA 5'-leader YOR303W S000005829
YNR075W	-	-	1.79039	COS10	Protein of unknown function, member of the DUP380 subfamily of conserved, often subtelomerically-encoded proteins YNR075W S000005358
YMR023C	-	-	1.77494	MSS1	PET53 Mitochondrial protein, forms a heterodimer complex with Mto1p that performs the 5-carboxymethylaminomethyl modification of the wobble uridine base in mitochondrial tRNAs; similar to human GTPBP3 respiratory deficient in presence of pr454 mutation in mitochondrial 15S rRNA; block in splicing of mitochondrial introns YMR023C S000004625
YDL054C	-	-	1.77024	MCH1	Protein with similarity to mammalian monocarboxylate permeases, which are involved in transport of monocarboxylic acids across the plasma membrane; mutant is not deficient in monocarboxylate transport YDL054C S000002212
YGL191W	-	-	1.7558	COX13	Subunit VIa of cytochrome c oxidase, which is the terminal member of the mitochondrial inner membrane electron transport chain; not essential for cytochrome c oxidase activity but may modulate activity in response to ATP Null mutant is viable, shows slightly reduced growth rate on nonfermentable carbon sources YGL191W S000003159
YLR300W	-	-	1.75351	EXG1	BGL1 Major exo-1,3-beta-glucanase of the cell wall, involved in cell wall beta-glucan assembly; exists as three differentially glycosylated isoenzymes Null mutant is viable, displays modest increase in killer toxin sensitivity and beta 1,6-glucan levels YLR300W S000004291
YPR191W	-	-	1.75121	QCR2	COR2|UCR2 Subunit 2 of the ubiquinol cytochrome-c reductase complex, which is a component of the mitochondrial inner membrane electron transport chain; phosphorylated; transcription is regulated by Hap1p, Hap2p/Hap3p, and heme Null mutant is viable and grows slowly on glycerol YPR191W S000006395
YMR316W	-	-	1.72969	DIA1	Protein of unknown function, involved in invasive and pseudohyphal growth; green fluorescent protein (GFP)-fusion protein localizes to the cytoplasm in a punctate pattern Null mutant is viable and causes invasive growth in haploids and pseudohyphal growth in diploids YMR316W S000004935
YHR071W	-	-	1.72861	PCL5	Cyclin, interacts with Pho85p cyclin-dependent kinase (Cdk), induced by Gcn4p at level of transcription, specifically required for Gcn4p degradation, may be sensor of cellular protein biosynthetic capacity YHR071W S000001113
YPR128C	-	-	1.72676	ANT1	Peroxisomal adenine nucleotide transporter; involved in beta-oxidation of medium-chain fatty acid; required for peroxisome proliferation Null: growth defect on medium-chain length fatty acids. YPR128C S000006332
YBR072W	-	-	1.72266	HSP26	Small heat shock protein (sHSP) with chaperone activity; forms hollow, sphere-shaped oligomers that suppress unfolded proteins aggregation; oligomer activation requires a heat-induced conformational change; not expressed in unstressed cells Null mutant is viable; hsp26 hsp42 double deletion mutants are viable YBR072W S000000276
YDL181W	-	-	1.71603	INH1	Protein that inhibits ATP hydrolysis by the F1F0-ATP synthase, inhibitory function is enhanced by stabilizing proteins Stf1p and Stf2p; has similarity to Stf1p and both Inh1p and Stf1p exhibit the potential to form coiled-coil structures Null mutant is viable; exhibits marked ATP hydrolysis in response to the uncoupler carbonylcyanide-m-chlorophenylhydrazone YDL181W S000002340
YGL157W	-	-	1.68893		NO_MATCH
YPL092W	-	-	1.68708	SSU1	LPG16 Plasma membrane sulfite pump involved in sulfite metabolism and required for efficient sulfite efflux; major facilitator superfamily protein YPL092W S000006013
YBR114W	-	-	1.68172	RAD16	PSO5 Protein that recognizes and binds damaged DNA in an ATP-dependent manner (with Rad7p) during nucleotide excision repair; subunit of Nucleotide Excision Repair Factor 4 (NEF4) and the Elongin-Cullin-Socs (ECS) ligase complex radiation sensitive YBR114W S000000318
YGR008C	-	-	1.68048	STF2	Protein involved in regulation of the mitochondrial F1F0-ATP synthase; Stf1p and Stf2p act as stabilizing factors that enhance inhibitory action of the Inh1p protein YGR008C S000003240
YJR111C	-	-	1.67754		NO_MATCH
YLR307W	-	-	1.67644	CDA1	Chitin deacetylase, together with Cda2p involved in the biosynthesis ascospore wall component, chitosan; required for proper rigidity of the ascospore wall Null mutant is viable, mutants spores disrupted for both cda1 and cda2 fail to emit natural fluorescence and are sensitive to hydrolyrtic enzymes, ether, and heat shock YLR307W S000004298
YGR237C	-	-	1.66925		NO_MATCH
YBR047W	-	-	1.6673	FMP23	Putative protein of unknown function; the authentic, non-tagged protein is detected in highly purified mitochondria in high-throughput studies YBR047W S000000251
YPL079W	-	-	1.66506	RPL21B	Protein component of the large (60S) ribosomal subunit, nearly identical to Rpl21Ap and has similarity to rat L21 ribosomal protein YPL079W S000006000
YML038C	-	-	1.65764	YMD8	Putative nucleotide sugar transporter, has similarity to Vrg4p YML038C S000004502
YJL223C	-	-	1.64382	PAU1	Part of 23-member seripauperin multigene family encoded mainly in subtelomeric regions, active during alcoholic fermentation, regulated by anaerobiosis, negatively regulated by oxygen, repressed by heme YJL223C S000003759
YGL148W	-	-	1.63917	ARO2	Bifunctional chorismate synthase and flavin reductase, catalyzes the conversion of 5-enolpyruvylshikimate 3-phosphate (EPSP) to form chorismate, which is a precursor to aromatic amino acids aromatic amino acid requiring; lack of premeiotic DNA synthesis; blocked sporulation in homozygous mutant YGL148W S000003116
YJR116W	-	-	1.63508		NO_MATCH
YDL038C	-	-	1.63377		NO_MATCH
YCLX09W	-	-	1.6271		NO_MATCH
YNL274C	-	-	1.62599	GOR1	Glyoxylate reductase; null mutation results in increased biomass after diauxic shift; the authentic, non-tagged protein is detected in highly purified mitochondria in high-throughput studies YNL274C S000005218
YHR208W	-	-	1.62489	BAT1	ECA39|TWT1 Mitochondrial branched-chain amino acid aminotransferase, homolog of murine ECA39; highly expressed during logarithmic phase and repressed during stationary phase Null mutant is viable; ILV auxotrophy in bat1 bat2 double mutant YHR208W S000001251
YLR395C	-	-	1.62146	COX8	Subunit VIII of cytochrome c oxidase, which is the terminal member of the mitochondrial inner membrane electron transport chain Null mutant is viable, deficient in cellular respiration and cytochrome C oxidase activity YLR395C S000004387
YIL119C	-	-	1.61187	RPI1	Putative transcriptional regulator; overexpression suppresses the heat shock sensitivity of wild-type RAS2 overexpression and also suppresses the cell lysis defect of an mpk1 mutation Null mutant is viable but shows heat-shock sensitivity YIL119C S000001381
YER003C	-	-	1.60508	PMI40	PMI Mannose-6-phosphate isomerase, catalyzes the interconversion of fructose-6-P and mannose-6-P; required for early steps in protein mannosylation Null mutant requires D-mannose for growth; temperature-sensitive mutant, in the absence of exogenous D-mannose, is unable to synthesize GDP-mannose and dolichol-phosphate-mannose and is unable to secrete some cell wall-associated proteins at the restr…
YKL016C	-	-	1.59966	ATP7	Subunit d of the stator stalk of mitochondrial F1F0 ATP synthase, which is a large, evolutionarily conserved enzyme complex required for ATP synthesis glycerol minus phenotype; mitochondria have no detectable oligomycin-sensitive ATPase activity; F1 loosely bound to the membranous portion YKL016C S000001499
YNL018C	-	-	1.59652		NO_MATCH
YKL201C	-	-	1.59175	MNN4	YKL200C Putative positive regulator of mannosylphosphate transferase (Mnn6p), involved in mannosylphosphorylation of N-linked oligosaccharides; expression increases in late-logarithmic and stationary growth phases mannan synthesis defective. mnn4 and ktr6 mutations affect the mannosylphosphorylation of O-linked oligosaccharide, together with that of N-linked oligosaccharide. YKL201C S000001684
YPL060W	-	-	1.5797	LPE10	Mitochondrial inner membrane magnesium transporter, involved in maintenance of magnesium concentrations inside mitochondria; indirectly affects splicing of group II introns; functionally and structurally related to Mrs2p YPL060W S000005981
YER178W	-	-	1.57672	PDA1	E1 alpha subunit of the pyruvate dehydrogenase (PDH) complex, catalyzes the direct oxidative decarboxylation of pyruvate to acetyl-CoA; phosphorylated; regulated by glucose Null mutant is viable, exhibits reduced growth on glucose and increased formation of petites YER178W S000000980
YLL047W	-	-	1.57355		NO_MATCH
YBR230C	-	-	1.57337	OM14	Integral mitochondrial outer membrane protein; abundance is decreased in cells grown in glucose relative to other carbon sources; appears to contain 3 alpha-helical transmembrane segments; ORF encodes a 97-basepair intron YBR230C S000000434
YGR257C	-	-	1.56502	MTM1	Mitochondrial protein of the mitochondrial carrier family, involved in activating mitochondrial Sod2p probably by facilitating insertion of an essential manganese cofactor Null: strong loss of SOD2 activity, mitochondrial iron accumulation YGR257C S000003489
YLR047C	-	+	1.56227	FRE8	Protein with sequence similarity to iron/copper reductases, involved in iron homeostasis; deletion mutant has iron deficiency/accumulation growth defects; expression increased in the absence of copper-responsive transcription factor Mac1p YLR047C S000004037
YKL128C	-	-	1.55344	PMU1	Putative phosphomutase, contains a region homologous to the active site of phosphomutases; overexpression suppresses the histidine auxotrophy of an ade3 ade16 ade17 triple mutant and the temperature sensitivity of a tps2 mutant Null mutant is viable; overproduction suppresses the ts growth of a tps2 mutant and prevents accumulation of trehalose-6-phosphate in the tps2 mutant YKL128C S000001611
YNL009W	-	-	1.54909	IDP3	Peroxisomal NADP-dependent isocitrate dehydrogenase, catalyzes oxidation of isocitrate to alpha-ketoglutarate with the formation of NADP(H+), required for growth on unsaturated fatty acids Null mutant is viable but is unable to grow on polyunsaturated fatty acids as sole carbon source YNL009W S000004954
YPL264C	-	-	1.54893		NO_MATCH
YLR256W	-	-	1.5421	HAP1	CYP1 Zinc finger transcription factor involved in the complex regulation of gene expression in response to levels of heme and oxygen; the S288C sequence differs from other strain backgrounds due to a Ty1 insertion in the carboxy terminus Essential for anaerobic or heme deficient growth; Null mutant is viable, deficient in expression of CYC1 and CYC7 YLR256W S000004246
YPL258C	-	-	1.54185	THI21	Hydroxymethylpyrimidine phosphate kinase, involved in the last steps in thiamine biosynthesis; member of a gene family with THI20 and THI22; functionally redundant with Thi20p null mutant is viable; the double deletion of YOL055c and YPL258c renders the cells auxotrophic for thiamine YPL258C S000006179
YOL014W	-	-	1.54144		NO_MATCH
YBR157C	-	-	1.53994	ICS2	Protein of unknown function; null mutation does not confer any obvious defects in growth, spore germination, viability, or carbohydrate utilization YBR157C S000000361
YCL055W	-	-	1.5364	KAR4	Transcription factor required for gene regulation in repsonse to pheromones; also required during meiosis; exists in two forms, a slower-migrating form more abundant during vegetative growth and a faster-migrating form induced by pheromone Defective in pheromone-induced expression of KAR3 and CIK1; therefore, defective in nuclear fusion because of defect in microtubule-dependent movement of nucle…
YLR127C	-	-	1.52999	APC2	RSI1|TID2 Subunit of the Anaphase-Promoting Complex/Cyclosome (APC/C), which is a ubiquitin-protein ligase required for degradation of anaphase inhibitors, including mitotic cyclins, during the metaphase/anaphase transition; similar to cullin Cdc53p Null mutant is inviable at 25 deg. C; ts mutants arrest in metaphase due to defect in the degradation of Pds1; extracts from G1-arrested apc2 mutants…
YHR008C	-	-	1.52598	SOD2	Mitochondrial superoxide dismutase, protects cells against oxygen toxicity; phosphorylated Null mutant is viable; growth is impaired by oxygen; SOD2 is required for sporulation YHR008C S000001050
YJR109C	-	-	1.52376	CPA2	Large subunit of carbamoyl phosphate synthetase, which catalyzes a step in the synthesis of citrulline, an arginine precursor YJR109C S000003870
YBR146W	-	-	1.5221	MRPS9	Mitochondrial ribosomal protein of the small subunit Null mutant is viable, respiration deficient, exhibits defects in mitochondrial protein synthesis as indicated by a loss of cytochrome c oxidase activity YBR146W S000000350
YLR359W	-	-	1.51918	ADE13	BRA1|BRA8 Adenylosuccinate lyase, catalyzes two steps in the 'de novo' purine nucleotide biosynthetic pathway; expression is repressed by adenine and activated by Bas1p and Pho2p; mutations in human ortholog ADSL cause adenylosuccinase deficiency Unable to grow on complete media with glucose or fructose as a carbon source, but can grow with glycerol or ethanol YLR359W S000004351
YMR232W	-	-	1.51162	FUS2	Cytoplasmic protein localized to the shmoo tip; required for the alignment of parental nuclei before nuclear fusion during mating Null mutant is viable, fus2 mutants have strong defects in karyogamy and fail to orient microtubules between parental nuclei in zygotes YMR232W S000004845
YER091C	-	-	1.51084	MET6	Cobalamin-independent methionine synthase, involved in amino acid biosynthesis; requires a minimum of two glutamates on the methyltetrahydrofolate substrate, similar to bacterial metE homologs Null mutant is viable, and is a methionine auxotroph YER091C S000000893
YER158C	-	-	1.50969		NO_MATCH
YOL140W	-	-	1.50947	ARG8	Acetylornithine aminotransferase, catalyzes the fourth step in the biosynthesis of the arginine precursor ornithine Arginine requiring YOL140W S000005500
YKL209C	-	-	1.50756	STE6	Plasma membrane ATP-binding cassette (ABC) transporter required for the export of a-factor, catalyzes ATP hydrolysis coupled to a-factor transport; contains 12 transmembrane domains and two ATP binding domains; expressed only in MATa cells sterility of MATa cells, failure to export a-factor YKL209C S000001692
YGL096W	-	-	1.50609	TOS8	Homeodomain-containing transcription factor; SBF regulated target gene that in turn regulates expression of genes involved in G1/S phase events such as bud site selection, bud emergence and cell cycle progression; similarity to Cup9p YGL096W S000003064
YDR058C	-	-	1.5042	TGL2	Protein with lipolytic activity towards triacylglycerols and diacylglycerols when expressed in E. coli; role in yeast lipid degradation is unclear Null mutant is viable, exhibits no apparent phenotype YDR058C S000002465
YCL030C	-	-	1.49627	HIS4	Multifunctional enzyme containing phosphoribosyl-ATP pyrophosphatase, phosphoribosyl-AMP cyclohydrolase, and histidinol dehydrogenase activities; catalyzes the second, third, ninth and tenth steps in histidine biosynthesis Null mutant is viable and requires histidine YCL030C S000000535
YLR257W	-	-	1.49413		NO_MATCH
YCR102C	-	-	1.49276		NO_MATCH
YNL220W	-	-	1.49065	ADE12	BRA9 Adenylosuccinate synthase, catalyzes the first step in synthesis of adenosine monophosphate from inosine 5'monophosphate during purine nucleotide biosynthesis; exhibits binding to single-stranded autonomously replicating (ARS) core sequence Adenine requiring YNL220W S000005164
YFL027C	-	-	1.48789	GYP8	GTPase-activating protein for yeast Rab family members; Ypt1p is the preferred in vitro substrate but also acts on Sec4p, Ypt31p and Ypt32p; involved in the regulation of ER to Golgi vesicle transport YFL027C S000001867
YFR003C	-	-	1.47383	YPI1	Inhibitor of the type I protein phosphatase Glc7p, which is involved in regulation of a variety of metabolic processes; overproduction causes decreased cellular content of glycogen YFR003C S000001899
YMR065W	-	-	1.46571	KAR5	FIG3 Protein required for nuclear membrane fusion during karyogamy, localizes to the membrane with a soluble portion in the endoplasmic reticulum lumen, may form a complex with Jem1p and Kar2p; expression of the gene is regulated by pheromone Null mutant is viable, mating defective, nuclear fusion defective YMR065W S000004669
YLL052C	-	-	1.46548	AQY2	Water channel that mediates the transport of water across cell membranes, only expressed in proliferating cells, controlled by osmotic signals, may be involved in freeze tolerance; disrupted by a stop codon in many S. cerevisiae strains YLL052C S000003975
YCL038C	-	-	1.46518	ATG22	AUT4 Vacuolar integral membrane protein required for efflux of amino acids during autophagic body breakdown in the vacuole; null mutation causes a gradual loss of viability during starvation Null mutant is viable, but exhibits defects in lysis of autophagic vesicles after delivery to the vacuole; vesicles accumulate in the vacuole in the absence of PMSF; maturation of the vacuolar protein, aminop…
YOR220W	-	-	1.46355	RCN2	WSP1 Protein of unknown function; green fluorescent protein (GFP)-fusion protein localizes to the cytoplasm and is induced in response to the DNA-damaging agent MMS YOR220W S000005746
YDR170W-A	-	-	1.46279		NO_MATCH
YLR080W	-	-	1.46066	EMP46	Integral membrane component of endoplasmic reticulum-derived COPII-coated vesicles, which function in ER to Golgi transport YLR080W S000004070
YLR108C	-	-	1.45883		NO_MATCH
YGL038C	-	-	1.45867	OCH1	LDB12|NGD29 Mannosyltransferase of the cis-Golgi apparatus, initiates the polymannose outer chain elongation of N-linked oligosaccharides of glycoproteins Null mutant is viable, temperature sensitive, lacks mannose outer chains YGL038C S000003006
YAL044C	-	-	1.4564	GCV3	H subunit of the mitochondrial glycine decarboxylase complex, required for the catabolism of glycine to 5,10-methylene-THF; expression is regulated by levels of levels of 5,10-methylene-THF in the cytoplasm Null mutant is viable but does not grow if glycine is the sole nitrogen source YAL044C S000000042
YER052C	-	-	1.45344	HOM3	BOR1|SIL4 Aspartate kinase (L-aspartate 4-P-transferase); cytoplasmic enzyme that catalyzes the first step in the common pathway for methionine and threonine biosynthesis; expression regulated by Gcn4p and the general control of amino acid synthesis Homoserine requiring; Borrelidin resistance YER052C S000000854
YHR018C	-	-	1.45129	ARG4	Argininosuccinate lyase, catalyzes the final step in the arginine biosynthesis pathway Arginine requiring YHR018C S000001060
YPL061W	-	-	1.44427	ALD6	ALD1 Cytosolic aldehyde dehydrogenase, activated by Mg2+ and utilizes NADP+ as the preferred coenzyme; required for conversion of acetaldehyde to acetate; constitutively expressed; locates to the mitochondrial outer surface upon oxidative stress Null mutant is viable, grows at approximately one-third the rate of wild-type, unable to grow on ethanol as a carbon source YPL061W S000005982
YKR091W	-	-	1.44353	SRL3	Cytoplasmic protein that, when overexpressed, suppresses the lethality of a rad53 null mutation; potential Cdc28p substrate YKR091W S000001799
YJR015W	-	-	1.43809		NO_MATCH
YFR053C	-	-	1.42733	HXK1	Hexokinase isoenzyme 1, a cytosolic protein that catalyzes phosphorylation of glucose during glucose metabolism; expression is highest during growth on non-glucose carbon sources; glucose-induced repression involves the hexokinase Hxk2p Null mutant is viable, is able to ferment fructose, and has little or no effect on glucose repression; hxk1, hxk2 double null mutant cannot ferment fructose and f…
YDR477W	-	-	1.42551	SNF1	CAT1|CCR1|GLC2|HAF3|PAS14 AMP-activated serine/threonine protein kinase found in a complex containing Snf4p and members of the Sip1p/Sip2p/Gal83p family; required for transcription of glucose-repressed genes, thermotolerance, sporulation, and peroxisome biogenesis Null mutant is viable, sensitive to heat stress and starvation and fails to accumulate glycogen during growth in rich medium; sucrose …
YDL244W	-	-	1.42526	THI13	Protein involved in synthesis of the thiamine precursor hydroxymethylpyrimidine (HMP); member of a subtelomeric gene family including THI5, THI11, THI12, and THI13 YDL244W S000002403
YDL131W	-	-	1.42056	LYS21	Homocitrate synthase isozyme, catalyzes the condensation of acetyl-CoA and alpha-ketoglutarate to form homocitrate, which is the first step in the lysine biosynthesis pathway; highly similar to the other isozyme, Lys20p YDL131W S000002289
YPR015C	-	-	1.4175		NO_MATCH
YDR034W-B	-	-	1.41525		NO_MATCH
YGR020C	-	+	1.41393	VMA7	Subunit F of the eight-subunit V1 peripheral membrane domain of vacuolar H+-ATPase (V-ATPase), an electrogenic proton pump found throughout the endomembrane system; required for the V1 domain to assemble onto the vacuolar membrane Null mutant is viable, unable to grow on media buffered at pH 7.5, fails to accumulate quinacrine into vacuoles, other subunits of the catalytic sector are not assemble…
YER156C	-	-	1.40592		NO_MATCH
YML040W	-	-	1.40051		NO_MATCH
YCLX08C	-	-	1.39683		NO_MATCH
YMR315W	-	-	1.38982		NO_MATCH
YMR316C-A	-	-	1.38801		NO_MATCH
YJR121W	-	-	1.38381	ATP2	Beta subunit of the F1 sector of mitochondrial F1F0 ATP synthase, which is a large, evolutionarily conserved enzyme complex required for ATP synthesis; phosphorylated Mutant displays a growth defect on glycerol YJR121W S000003882
YLL060C	-	-	1.3777	GTT2	Glutathione S-transferase capable of homodimerization; functional overlap with Gtt2p, Grx1p, and Grx2p YLL060C S000003983
YOR315W	-	-	1.37673	SFG1	Nuclear protein, putative transcription factor required for growth of superficial pseudohyphae (which do not invade the agar substrate) but not for invasive pseudohyphal growth; may act together with Phd1p; potential Cdc28p substrate YOR315W S000005842
YDL182W	-	-	1.37556	LYS20	Homocitrate synthase isozyme, catalyzes the condensation of acetyl-CoA and alpha-ketoglutarate to form homocitrate, which is the first step in the lysine biosynthesis pathway; highly similar to the other isozyme, Lys21p Null mutant is viable, is able to grow on minimal media, and exhibits reduced but significant homocitrate synthase activity YDL182W S000002341
YNR058W	-	-	1.37393	BIO3	7,8-diamino-pelargonic acid aminotransferase (DAPA), catalyzes the second step in the biotin biosynthesis pathway; BIO3 is in a cluster of 3 genes (BIO3, BIO4, and BIO5) that mediate biotin synthesis YNR058W S000005341
YBR285W	-	-	1.37189		NO_MATCH
YHR047C	-	-	1.36845	AAP1	AAP1' Arginine/alanine aminopeptidase, overproduction stimulates glycogen accumulation null mutant is viable, decrease in glycogen accumulation YHR047C S000001089
YGR052W	-	-	1.36425	FMP48	Putative protein of unknown function; the authentic, non-tagged protein is detected in highly purified mitochondria in high-throughput studies; induced by treatment with 8-methoxypsoralen and UVA irradiation YGR052W S000003284
YMR001C	-	-	1.36181	CDC5	MSD2|PKX2 Polo-like kinase with similarity to Xenopus Plx1 and S. pombe Plo1p; found at bud neck, nucleus and SPBs; has multiple functions in mitosis and cytokinesis through phosphorylation of substrates; may be a Cdc28p substrate Null mutant is inviable. cdc5(ts) mutants form synaptonemal complexes lacking central elements and arrest either at meiosis I with broken spindles or at meiosis II with…
YCL049C	-	-	1.35845		NO_MATCH
YOR306C	-	-	1.35634	MCH5	Plasma membrane riboflavin transporter; facilitates the uptake of vitamin B2; required for FAD-dependent processes; sequence similarity to mammalian monocarboxylate permeases, however mutants are not deficient in monocarboxylate transport YOR306C S000005833
YIL175W	-	-	1.35331		NO_MATCH
YBR137W	-	-	1.35318		NO_MATCH
YAL061W	-	-	1.35291	BDH2	Putative medium-chain alcohol dehydrogenase with similarity to BDH1; transcription induced by constitutively active PDR1 and PDR3; BDH2 is an essential gene YAL061W S000000057
YIL162W	-	-	1.34706	SUC2	Invertase, sucrose hydrolyzing enzyme; a secreted, glycosylated form is regulated by glucose repression, and an intracellular, nonglycosylated enzyme is produced constitutively Null mutant is viable but cannot ferment sucrose YIL162W S000001424
YIL074C	-	-	1.33975	SER33	3-phosphoglycerate dehydrogenase, catalyzes the first step in serine and glycine biosynthesis; isozyme of Ser3p Null: enzyme activity of 3P-glycerate dehydrogenase is decreased in null mutant compared to wildtype and abolished in ser3 ser33 double deletion mutant, Ser33p is the major isoenyme YIL074C S000001336
YDR019C	-	-	1.32809	GCV1	GSD1 T subunit of the mitochondrial glycine decarboxylase complex, required for the catabolism of glycine to 5,10-methylene-THF; expression is regulated by levels of levels of 5,10-methylene-THF in the cytoplasm Null mutant is viable but cannot use glycine as sole nitrogen source YDR019C S000002426
YER060W	-	-	1.32638	FCY21	Putative purine-cytosine permease, very similar to Fcy2p but cannot substitute for its function YER060W S000000862
YER128W	-	-	1.31584		NO_MATCH
YPL132W	-	-	1.3135	COX11	LPI13|PSO7 Mitochondrial inner membrane protein required for delivery of copper to the Cox1p subunit of cytochrome c oxidase; association with mitochondrial ribosomes suggests that copper delivery may occur during translation of Cox1p deficient in cytochrome oxidase; sensitive to photoactivated 3-carbethoxypsoralen, UV light, radiomimetic mutagens, and oxidative stress YPL132W S000006053
YHR096C	-	-	1.31337	HXT5	Hexose transporter with moderate affinity for glucose, induced in the presence of non-fermentable carbon sources, induced by a decrease in growth rate, contains an extended N-terminal domain relative to other HXTs YHR096C S000001138
YCL064C	-	-	1.31163	CHA1	Catabolic L-serine (L-threonine) deaminase, catalyzes the degradation of both L-serine and L-threonine; required to use serine or threonine as the sole nitrogen source, transcriptionally induced by serine and threonine Null mutant is viable and cannot grow on media with L-serine or L-threonine as sole nitrogen source YCL064C S000000569
YBR110W	-	-	1.31123	ALG1	Mannosyltransferase, involved in asparagine-linked glycosylation in the endoplasmic reticulum (ER); essential for viability, mutation is functionally complemented by human ortholog YBR110W S000000314
YLL002W	-	-	1.30567	RTT109	KIM2|REM50 Histone acetyltransferase critical for cell survival in the presence of DNA damage during S phase, acetylates H3-K56; plays a role in regulation of Ty1 transposition Mutant exhibits abnormal mitochondrial morphology and slight growth defect in dextrose; insertion/truncation at amino acid 332 yields sensitivity to diepoxybutane and to mitomycin C; increase in Ty1 transposition YLL002W S…
YER042W	-	-	1.30242	MXR1	MSRA Peptide methionine sulfoxide reductase, reverses the oxidation of methionine residues; involved in oxidative damage repair, providing resistance to oxidative stress and regulation of lifespan YER042W S000000844
YFL058W	-	-	1.30075	THI5	Protein involved in synthesis of the thiamine precursor hydroxymethylpyrimidine (HMP); member of a subtelomeric gene family including THI5, THI11, THI12, and THI13 Null: null mutant viable, no phenotype; thi5, thi11,thi12, thi13 quadruple mutant shows hydroxymethyl pyrimidine auxotrophy YFL058W S000001836
YHR030C	-	-	1.29541	SLT2	BYC2|MPK1|SLK2 Serine/threonine MAP kinase involved in regulating the maintenance of cell wall integrity and progression through the cell cycle; regulated by the PKC1-mediated signaling pathway Null mutant is viable but temperature sensitive. At elevated temperatures or in the presence of caffeine, mull mutants exhibit cell wall defects that result in cell lysis. Lysis is prevented by addition of…
YNR069C	-	-	1.29541	BSC5	Protein of unknown function, ORF exhibits genomic organization compatible with a translational readthrough-dependent mode of expression YNR069C S000005352
YGR294W	-	-	1.29258	PAU12	Hypothetical protein YGR294W S000003526
YHL015W	-	-	1.28915	RPS20	URP2 Protein component of the small (40S) ribosomal subunit; overproduction suppresses mutations affecting RNA polymerase III-dependent transcription; has similarity to E. coli S10 and rat S20 ribosomal proteins YHL015W S000001007
YHR061C	-	-	1.28741	GIC1	Protein of unknown function involved in initiation of budding and cellular polarization, interacts with Cdc42p via the Cdc42/Rac-interactive binding (CRIB) domain Null mutant is viable; gic1 gic2 double null is temperature sensitive at 33 degrees C YHR061C S000001103
YIL176C	-	-	1.28528	PAU14	Hypothetical protein YIL176C S000001438
YGR260W	-	-	1.28024	TNA1	High affinity nicotinic acid plasma membrane permease, responsible for uptake of low levels of nicotinic acid; expression of the gene increases in the absence of extracellular nicotinic acid or para-aminobenzoate (PABA) Null mutant is viable; the deletion of both YGR260W and YJR025C/BNA1 is lethal at low external nicotinic acid concentration YGR260W S000003492
YMR321C	-	-	1.27557		NO_MATCH
YEL049W	-	-	1.27182	PAU2	Part of 23-member seripauperin multigene family encoded mainly in subtelomeric regions, active during alcoholic fermentation, regulated by anaerobiosis, negatively regulated by oxygen, repressed by heme YEL049W S000000775
YOR271C	-	-	1.25664	FSF1	Putative protein, predicted to be an alpha-isopropylmalate carrier; belongs to the sideroblastic-associated protein family; non-tagged protein is detected in purified mitochondria; likely to play a role in iron homeostasis YOR271C S000005797
YER121W	-	-	1.25458		NO_MATCH
YIL019W	-	-	1.25263	FAF1	Protein required for pre-rRNA processing and 40S ribosomal subunit assembly YIL019W S000001281
YDR216W	-	-	1.25103	ADR1	Carbon source-responsive zinc-finger transcription factor, required for transcription of the glucose-repressed gene ADH2, of peroxisomal protein genes, and of genes required for ethanol, glycerol, and fatty acid utilization abolished derepression of ADH2 YDR216W S000002624
YJR156C	-	-	1.24671	THI11	Protein involved in synthesis of the thiamine precursor hydroxymethylpyrimidine (HMP); member of a subtelomeric gene family including THI5, THI11, THI12, and THI13 YJR156C S000003917
YHR006W	-	-	1.2463	STP2	Transcription factor, activated by proteolytic processing in response to signals from the SPS sensor system for external amino acids; activates transcription of amino acid permease genes YHR006W S000001048
YCR075C	-	-	1.23196	ERS1	Protein with similarity to human cystinosin, which is a H(+)-driven transporter involved in L-cystine export from lysosomes and implicated in the disease cystinosis; contains seven transmembrane domains YCR075C S000000671
YHR005C	-	-	1.23115	GPA1	CDC70|DAC1|SCG1 GTP-binding alpha subunit of the heterotrimeric G protein that couples to pheromone receptors; negatively regulates the mating pathway by sequestering G(beta)gamma and by triggering an adaptive response; activates Vps34p at the endosome The null mutation is inviable in haploids but not diploids. Gpa1 mutants exhibit specific defects in the pheromone responsiveness of both a and al…
YDR531W	-	-	1.23048		NO_MATCH
YER075C	-	-	1.22912	PTP3	Phosphotyrosine-specific protein phosphatase involved in the inactivation of mitogen-activated protein kinase (MAPK) during osmolarity sensing; dephosporylates Hog1p MAPK and regulates its localization; localized to the cytoplasm Null mutant is viable; disruption of PTP3 in combination with its homolog PTP2 results in constitutive tyrosine phosphorylation,enhanced kinase activity of Fus3p MAP kin…
YOR389W	-	-	1.22318		NO_MATCH
YOR390W	-	-	1.21634		NO_MATCH
YNL160W	-	-	1.21531	YGP1	Cell wall-related secretory glycoprotein; induced by nutrient deprivation-associated growth arrest and upon entry into stationary phase; may be involved in adaptation prior to stationary phase entry; has similarity to Sps100p YNL160W S000005104
YLL053C	-	-	1.21166		NO_MATCH
YBL106C	-	-	1.20086	SRO77	SNI2|SOP2 Protein with roles in exocytosis and cation homeostasis; functions in docking and fusion of post-Golgi vesicles with plasma membrane; homolog of Sro7p and Drosophila lethal giant larvae tumor suppressor; interacts with SNARE protein Sec9p Null mutant is viable and shows no phenotypes, but is cs- in combination with sro7/sni1 (YPR032W) null; sro7/sni1 sro77/sni2 double mutants have an ex…
YMR062C	-	-	1.2006	ECM40	ARG7 Mitochondrial ornithine acetyltransferase, catalyzes the fifth step in arginine biosynthesis; also possesses acetylglutamate synthase activity, regenerates acetylglutamate while forming ornithine YMR062C S000004666
YER004W	-	-	1.20029	FMP52	Protein of unknown function, localized to the mitochondrial outer membrane; induced by treatment with 8-methoxypsoralen and UVA irradiation YER004W S000000806
YKL103C	-	-	1.19992	LAP4	APE1|API|YSC1 Vacuolar aminopeptidase, often used as a marker protein in studies of autophagy and cytosol to vacuole targeting (CVT) pathway Leucine aminopeptidase deficient YKL103C S000001586
YAR074C	-	-	1.19415		NO_MATCH
YBR092C	-	-	1.1886	PHO3	phoC Constitutively expressed acid phosphatase similar to Pho5p; brought to the cell surface by transport vesicles; hydrolyzes thiamin phosphates in the periplasmic space, increasing cellular thiamin uptake; expression is repressed by thiamin phosphatase deficient YBR092C S000000296
YER048C	-	-	1.18289	CAJ1	Nuclear type II J heat shock protein of the E. coli dnaJ family, contains a leucine zipper-like motif, binds to non-native substrates for presentation to Ssa3p, may function during protein translocation, assembly and disassembly YER048C S000000850
YLR038C	-	-	1.1813	COX12	Subunit VIb of cytochrome c oxidase, which is the terminal member of the mitochondrial inner membrane electron transport chain; required for assembly of cytochrome c oxidase but not required for activity after assembly; phosphorylated Null mutant is viable, grows poorly at room temperature, fails to grow on glycerol/ethanol media at 37 degrees YLR038C S000004028
YJL199C	-	-	1.17981	MBB1	Dubious open reading frame, unlikely to encode a protein; not conserved in closely related Saccharomyces species; protein detected in large-scale protein-protein interaction studies YJL199C S000003735
YBR265W	-	-	1.17948	TSC10	3-ketosphinganine reductase, catalyzes the second step in phytosphingosine synthesis, essential for growth in the absence of exogenous dihydrosphingosine or phytosphingosine, member of short chain dehydrogenase/reductase protein family YBR265W S000000469
YLR266C	-	-	1.17522	PDR8	Transcription factor; targets include ATP-binding cassette (ABC) transporters, major facilitator superfamily transporters, and other genes involved in the pleiotropic drug resistance (PDR) phenomenon Null: Slight resistance to hygromycin B. Other phenotypes: Artificial activation and overexpression gives resistance to ketoconazole and oligomycin and gives sensitivity to NaCL, LiCl and Hygromycin …
YDR032C	-	-	1.17483	PST2	Protein with similarity to members of a family of flavodoxin-like proteins; induced by oxidative stress in a Yap1p dependent manner; the authentic, non-tagged protein is detected in highly purified mitochondria in high-throughput studies YDR032C S000002439
YLR092W	-	-	1.17308	SUL2	High affinity sulfate permease; sulfate uptake is mediated by specific sulfate transporters Sul1p and Sul2p, which control the concentration of endogenous activated sulfate intermediates YLR092W S000004082
YGR035C	-	-	1.17134		NO_MATCH
YER044C	-	-	1.17101	ERG28	BUD18 Endoplasmic reticulum membrane protein, may facilitate protein-protein interactions between the Erg26p dehydrogenase and the Erg27p 3-ketoreductase and/or tether these enzymes to the ER, also interacts with Erg6p Null mutant is viable; random budding in diploid null mutants; null cells have an unusual sterol content. YER044C S000000846
YOL151W	-	-	1.17068	GRE2	3-methylbutanal reductase and NADPH-dependent methylglyoxal reductase (D-lactaldehyde dehydrogenase); stress induced (osmotic, ionic, oxidative, heat shock and heavy metals); regulated by the HOG pathway YOL151W S000005511
YJR159W	-	-	1.16359	SOR1	SDH1 Sorbitol dehydrogenase; expression is induced in the presence of sorbitol YJR159W S000003920
YNL015W	-	-	1.16093	PBI2	I2B|IB2|LMA1 Cytosolic inhibitor of vacuolar proteinase B, required for efficient vacuole inheritance; with thioredoxin forms protein complex LMA1, which assists in priming SNARE molecules and promotes vacuole fusion Null mutant is viable but shows 50% elevation of protein degradation rate when cells are subject to nutritional stress YNL015W S000004960
YER179W	-	-	1.16013	DMC1	ISC2 Meiosis-specific protein required for repair of double-strand breaks and pairing between homologous chromosomes; homolog of Rad51p and the bacterial RecA protein YER179W S000000981
YGR250C	-	-	1.16009		NO_MATCH
YLR303W	-	-	1.15805	MET17	MET15|MET25 Methionine and cysteine synthase (O-acetyl homoserine-O-acetyl serine sulfhydrylase), required for sulfur amino acid synthesis YLR303W S000004294
YDR234W	-	-	1.15659	LYS4	LYS3 Homoaconitase, catalyzes the conversion of homocitrate to homoisocitrate, which is a step in the lysine biosynthesis pathway Lysine requiring YDR234W S000002642
YKL152C	-	-	1.1373	GPM1	Tetrameric phosphoglycerate mutase, mediates the conversion of 3-phosphoglycerate to 2-phosphoglycerate during glycolysis and the reverse reaction during gluconeogenesis Required for sporulation YKL152C S000001635
YGL071W	-	-	1.13641	AFT1	RCS1 Transcription factor involved in iron utilization and homeostasis; binds the consensus site PyPuCACCCPu and activates the expression of target genes in response to changes in iron availability Null mutant is viable; mutant cells are larger than normal, since critical size for budding is increased; mutant shows incorrect regulation of expression of genes involved in iron uptake; spores from h…
YNL125C	-	-	1.12931	ESBP6	MCH3 Protein with similarity to monocarboxylate permeases, appears not to be involved in transport of monocarboxylates such as lactate, pyruvate or acetate across the plasma membrane YNL125C S000005069
YBR116C	-	-	1.1286		NO_MATCH
YDR262W	-	-	1.1263		NO_MATCH
YKL004W	-	-	1.12512	AUR1	Phosphatidylinositol:ceramide phosphoinositol transferase (IPC synthase), required for sphingolipid synthesis; can mutate to confer aureobasidin A resistance Null mutant is inviable; mutant exhibits dominant resistance to aureobasidin A. Wild type (sensitive) is recessive. YKL004W S000001487
YJL200C	-	-	1.12272	ACO2	Putative mitochondrial aconitase isozyme; similarity to Aco1p, an aconitase required for the TCA cycle; expression induced during growth on glucose, by amino acid starvation via Gcn4p, and repressed on ethanol YJL200C S000003736
YPL223C	-	-	1.12253	GRE1	Hydrophilin of unknown function; stress induced (osmotic, ionic, oxidative, heat shock and heavy metals); regulated by the HOG pathway Null mutant is viable and shows no phenotype in osmotic, ionic or oxidative stress YPL223C S000006144
YMR006C	-	-	1.12072	PLB2	Phospholipase B (lysophospholipase) involved in phospholipid metabolism; displays transacylase activity in vitro; overproduction confers resistance to lysophosphatidylcholine overexpression confers resistance to lysophosphatidylcholine YMR006C S000004608
YFL028C	-	-	1.10863	CAF16	Part of the evolutionarily-conserved CCR4-NOT transcriptional regulatory complex involved in controlling mRNA initiation, elongation, and degradation; putative ABC ATPase; interacts with Ssn2p, Ssn3p, and Ssn8p YFL028C S000001866
YGR124W	-	-	1.10673	ASN2	Asparagine synthetase, isozyme of Asn1p; catalyzes the synthesis of L-asparagine from L-aspartate in the asparagine biosynthetic pathway Null mutant is viable; L-asparagine auxotrophy occurs upon mutation of both ASN1 and ASN2 YGR124W S000003356
YPL239W	-	-	1.10665	YAR1	Cytoplasmic ankyrin-repeat containing protein of unknown function, proposed to link the processes of 40S ribosomal subunit biogenesis and adaptation to osmotic and oxidative stress; expression repressed by heat shock Null mutant is viable, grow slowly at low temperature. YAR1 overexpression has no phenotype YPL239W S000006160
YLR149C	-	-	1.10638		NO_MATCH
YBR046C	-	-	1.10387	ZTA1	Zeta-crystallin homolog, found in the cytoplasm and nucleus; has similarity to E. coli quinone oxidoreductase and to human zeta-crystallin, which has quinone oxidoreductase activity YBR046C S000000250
YKL161C	-	-	1.10199		NO_MATCH
YEL039C	-	-	1.10177	CYC7	Cytochrome c isoform 2, expressed under hypoxic conditions; electron carrier of the mitochondrial intermembrane space that transfers electrons from ubiquinone-cytochrome c oxidoreductase to cytochrome c oxidase during cellular respiration YEL039C S000000765
YML060W	-	-	1.09521	OGG1	Mitochondrial glycosylase/lyase that specifically excises 7,8-dihydro-8-oxoguanine residues located opposite cytosine or thymine residues in DNA, repairs oxidative damage to mitochondrial DNA Inactivation of OGG1 creates a mutator phenotype specific for the generation of GC to TA transversions. YML060W S000004525
YDR254W	-	-	1.08986	CHL4	CTF17|MCM17 Outer kinetochore protein required for chromosome stability, interacts with kinetochore proteins Ctf19p, Ctf3p, and Iml3p; exhibits a two-hybrid interaction with Mif2p; association with CEN DNA requires Ctf19p Null mutant is viable. Some authors report a temperature-senstive deletion allele, while others fine no temperature sensitivity in another deletion allele. Fidelity of chromosom…
YPR065W	-	-	1.08717	ROX1	REO1 Heme-dependent repressor of hypoxic genes; contains an HMG domain that is responsible for DNA bending activity The null mutant is viable but misexpresses several heme-regulated genes. YPR065W S000006269
YKL211C	-	-	1.08708	TRP3	Bifunctional enzyme exhibiting both indole-3-glycerol-phosphate synthase and anthranilate synthase activities, forms multifunctional hetero-oligomeric anthranilate synthase:indole-3-glycerol phosphate synthase enzyme complex with Trp2p Null mutant is viable, tryptophan auxotroph YKL211C S000001694
YLL064C	-	-	1.08239	PAU18	Hypothetical protein YLL064C S000003987
YGR092W	-	-	1.07812	DBF2	Ser/Thr kinase involved in transcription and stress response; functions as part of a network of genes in exit from mitosis; localization is cell cycle regulated; activated by Cdc15p during the exit from mitosis Null mutant is viable, dbf1 dbf20 null mutants are inviable; mutants show dumb-bell phenotype YGR092W S000003324
YER175C	-	-	1.07565	TMT1	TAM1 Trans-aconitate methyltransferase, cytosolic enzyme that catalyzes the methyl esterification of 3-isopropylmalate, an intermediate of the leucine biosynthetic pathway, and trans-aconitate, which inhibits the citric acid cycle YER175C S000000977
YML010C-B	-	-	1.07383		NO_MATCH
YOR317W	-	-	1.07223	FAA1	Long chain fatty acyl-CoA synthetase with a preference for C12:0-C16:0 fatty acids; involved in the activation of imported fatty acids; localized to both lipid particles and mitochondrial outer membrane; essential for stationary phase Null mutant is viable as long as fatty acid synthase (fas) complex is active YOR317W S000005844
YGL156W	-	-	1.07109	AMS1	Vacuolar alpha mannosidase, involved in free oligosaccharide (fOS) degradation; delivered to the vacuole in a novel pathway separate from the secretory pathway YGL156W S000003124
YER124C	-	-	1.06965	DSE1	Daughter cell-specific protein, may participate in pathways regulating cell wall metabolism; deletion affects cell separation after division and sensitivity to drugs targeted against the cell wall YER124C S000000926
YDL039C	-	-	1.06959	PRM7	Pheromone-regulated protein, predicted to have one transmembrane segment; promoter contains Gcn4p binding elements YDL039C S000002197
YOL154W	-	-	1.05737	ZPS1	Putative GPI-anchored protein; transcription is induced under low-zinc conditions, as mediated by the Zap1p transcription factor, and at alkaline pH YOL154W S000005514
YPL191C	-	-	1.05404		NO_MATCH
YAL068C	-	-	1.04997	PAU8	Hypothetical protein YAL068C S000002142
YAL053W	-	-	1.04957	FLC2	HUF2 Putative FAD transporter; required for uptake of FAD into endoplasmic reticulum; involved in cell wall maintenance YAL053W S000000049
YKL142W	-	-	1.04761	MRP8	YKL3 Putative mitochondrial ribosomal protein, has similarity to E. coli ribosomal protein S2 YKL142W S000001625
YIL121W	-	-	1.04338	QDR2	Multidrug transporter of the major facilitator superfamily, required for resistance to quinidine, barban, cisplatin, and bleomycin; may have a role in potassium uptake YIL121W S000001383
YBR026C	-	-	1.04171	ETR1	MRF1|MRF1' 2-enoyl thioester reductase, member of the medium chain dehydrogenase/reductase family; localized to in mitochondria, where it has a probable role in fatty acid synthesis YBR026C S000000230
YGL125W	-	-	1.04116	MET13	MET11|MRPL45 Isozyme of methylenetetrahydrofolate reductase, catalyzes the reduction of 5,10-methylenetetrahydrofolate to 5-methyltetrahydrofolate in the methionine biosynthesis pathway Null mutant is viable and shows methionine auxotrophy; double disruption of MET12 and MET13 (the two putative mthfr genes) also confers methionine auxotrophy, but has no other known phenotype at this time. YGL125W…
YDR178W	-	-	1.03815	SDH4	ACN18 Membrane anchor subunit of succinate dehydrogenase (Sdh1p, Sdh2p, Sdh3p, Sdh4p), which couples the oxidation of succinate to the transfer of electrons to ubiquinone Null mutant is viable, retains ability to grow on rich glycerol media YDR178W S000002585
YOL136C	-	-	1.03551	PFK27	6-phosphofructo-2-kinase, catalyzes synthesis of fructose-2,6-bisphosphate; inhibited by phosphoenolpyruvate and sn-glycerol 3-phosphate, expression induced by glucose and sucrose, transcriptional regulation involves protein kinase A YOL136C S000005496
YEL072W	-	-	1.0333	RMD6	Protein required for sporulation YEL072W S000000798
YLR423C	-	-	1.03211	ATG17	APG17 Scaffold potein responsible for pre-autophagosomal structure organization; interacts with and is required for activation of Apg1p protein kinase; involved in autophagy but not in the Cvt (cytoplasm to vacuole targeting) pathway required for activation of Apg1 protein kinase|Null mutant is viable and has defect in autophagy YLR423C S000004415
YMR226C	-	-	1.02892	TMA29	NADP(+)-dependent dehydrogenase; acts on serine, L-allo-threonine, and other 3-hydroxy acids; green fluorescent protein fusion protein localizes to the cytoplasm and nucleus; may interact with ribosomes, based on co-purification experiments YMR226C S000004839
YCR099C	-	-	1.02561		NO_MATCH
YGL030W	-	-	1.02472	RPL30	Protein component of the large (60S) ribosomal subunit, has similarity to rat L30 ribosomal protein; involved in pre-rRNA processing in the nucleolus; autoregulates splicing of its transcript YGL030W S000002998
YPL028W	-	-	1.02164	ERG10	LPB3|TSM0115 Acetyl-CoA C-acetyltransferase (acetoacetyl-CoA thiolase), cytosolic enzyme that transfers an acetyl group from one acetyl-CoA molecule to another, forming acetoacetyl-CoA; involved in the first step in mevalonate biosynthesis Nul mutant is inviable; other mutants are ergosterol biosynthesis defective or nystatin resistant YPL028W S000005949
YBL003C	-	-	1.01817	HTA2	H2A2 One of two nearly identical (see also HTA1) histone H2A subtypes; core histone required for chromatin assembly and chromosome function; DNA damage-dependent phosphorylation by Mec1p facilitates DNA repair; acetylated by Nat4p Null mutant is viable. Deletion of the HTA2-HTB2 (TRT2) locus has no reported observable phenotypes, presumably because HTA1-HTB1 (TRT1) expression is upregulated and c…
YGR155W	-	-	1.01416	CYS4	NHS5|STR4|VMA41 Cystathionine beta-synthase, catalyzes the synthesis of cystathionine from serine and homocysteine, the first committed step in cysteine biosynthesis Null exhibits vacuolar acidification defects; cys2 and cys4 mutations are linked together and cooperatively confer cysteine dependence. YGR155W S000003387
YBR009C	-	-	1.00317	HHF1	One of two identical histone H4 proteins (see also HHF2); core histone required for chromatin assembly and chromosome function; contributes to telomeric silencing; N-terminal domain involved in maintaining genomic integrity YBR009C S000000213
YKL148C	-	-	0.990382	SDH1	Flavoprotein subunit of succinate dehydrogenase (Sdh1p, Sdh2p, Sdh3p, Sdh4p), which couples the oxidation of succinate to the transfer of electrons to ubiquinone YKL148C S000001631
YDL037C	-	-	0.982354	BSC1	Protein of unconfirmed function, similar to cell surface flocculin Muc1p; ORF exhibits genomic organization compatible with a translational readthrough-dependent mode of expression YDL037C S000002195
YDR525W-A	-	-	0.981555	SNA2	Protein of unknown function, has similarity to Pmp3p, which is involved in cation transport; green fluorescent protein (GFP)-fusion protein localizes to the cytoplasm in a punctate pattern YDR525W-A S000007236
YGL068W	-	-	0.981227	MNP1	Protein associated with the mitochondrial nucleoid; putative mitochondrial ribosomal protein with similarity to E. coli L7/L12 ribosomal protein; required for normal respiratory growth YGL068W S000003036
YBR159W	-	-	0.979614	IFA38	Microsomal beta-keto-reductase; contains oleate response element (ORE) sequence in the promoter region; mutants exhibit reduced VLCFA synthesis, accumulate high levels of dihydrosphingosine, phytosphingosine and medium-chain ceramides YBR159W S000000363
YNL200C	-	-	0.977416		NO_MATCH
YFR004W	-	-	0.976534	RPN11	MPR1 Metalloprotease subunit of the 19S regulatory particle of the 26S proteasome lid; couples the deubiquitination and degradation of proteasome substrates YFR004W S000001900
YGL056C	-	-	0.975733	SDS23	One of two S. cerevisiae homologs (Sds23p and Sds24p) of the Schizosaccharomyces pombe Sds23 protein, which genetic studies have implicated in APC/cyclosome regulation YGL056C S000003024
YNL306W	-	-	0.972179	MRPS18	Mitochondrial ribosomal protein of the small subunit; essential for viability, unlike most other mitoribosomal proteins YNL306W S000005250
YIL124W	-	-	0.969704	AYR1	NADPH-dependent 1-acyl dihydroxyacetone phosphate reductase found in lipid particles, ER, and mitochondrial outer membrane; involved in phosphatidic acid biosynthesis; required for spore germination; capable of metabolizing steroid hormones Null mutant is viable. ybr159w/ayr1 double mutant is inviable. YIL124W S000001386
YBL043W	-	-	0.96869	ECM13	Non-essential protein of unknown function; induced by treatment with 8-methoxypsoralen and UVA irradiation A Tn3 insertion into this gene causes hypersensitivity to the cell surface polymer perturbing agent calcofluor white. YBL043W S000000139
YPR125W	-	-	0.965555	YLH47	Mitochondrial inner membrane protein exposed to the mitochondrial matrix, associates with mitochondrial ribosomes, NOT required for respiratory growth; homolog of human Letm1, a protein implicated in Wolf-Hirschhorn syndrome YPR125W S000006329
YFL034C-A	-	-	0.961568	RPL22B	YFL035C-B Protein component of the large (60S) ribosomal subunit, has similarity to Rpl22Ap and to rat L22 ribosomal protein YFL034C-A S000006436
YHR042W	-	-	0.960855	NCP1	CPR1 NADP-cytochrome P450 reductase; involved in ergosterol biosynthesis; associated and coordinately regulated with Erg11p YHR042W S000001084
YLR461W	-	-	0.960779	PAU4	Part of 23-member seripauperin multigene family encoded mainly in subtelomeric regions, active during alcoholic fermentation, regulated by anaerobiosis, negatively regulated by oxygen, repressed by heme YLR461W S000004453
YNL194C	-	-	0.960297		NO_MATCH
YGL196W	-	-	0.955666	DSD1	D-serine dehydratase (aka D-serine ammonia-lyase); converts D-serine to pyruvate and ammonia; specifc for D-serine, unlike the bacterial enzyme which recognizes both D-serine and L-serine as substrates YGL196W S000003164
YOR130C	-	-	0.952137	ORT1	ARG11 Ornithine transporter of the mitochondrial inner membrane, exports ornithine from mitochondria as part of arginine biosynthesis; human ortholog is associated with hyperammonaemia-hyperornithinaemia-homocitrullinuria (HHH) syndrome Null mutant is viable, arginine bradytroph YOR130C S000005656
YIL045W	-	-	0.949466	PIG2	Putative type-1 protein phosphatase targeting subunit that tethers Glc7p type-1 protein phosphatase to Gsy2p glycogen synthase YIL045W S000001307
YFR006W	-	-	0.9443		NO_MATCH
YHR180W	-	-	0.937275		NO_MATCH
YGL261C	-	-	0.936193	PAU11	Putative protein of unknown function; mRNA expression appears to be regulated by SUT1 and UPC2 YGL261C S000003230
YLR325C	-	-	0.923946	RPL38	Protein component of the large (60S) ribosomal subunit, has similarity to rat L38 ribosomal protein YLR325C S000004317
YML070W	-	-	0.923627	DAK1	Dihydroxyacetone kinase, required for detoxification of dihydroxyacetone (DHA); involved in stress adaptation Null mutant is viable and shows no growth defect in normal medium; mutant lacking both dak1 and dak2 is sensitive to dihydroxyacetone during saline growth YML070W S000004535
YNR068C	-	-	0.922067		NO_MATCH
YBR093C	-	-	0.918821	PHO5	phoE Repressible acid phosphatase (1 of 3) that also mediates extracellular nucleotide-derived phosphate hydrolysis; secretory pathway derived cell surface glycoprotein; induced by phosphate starvation and coordinately regulated by PHO4 and PHO2 phosphatase deficient YBR093C S000000297
YLR113W	-	-	0.915142	HOG1	SSK3 Mitogen-activated protein kinase involved in osmoregulation via three independent osmosensors; mediates the recruitment and activation of RNA Pol II at Hot1p-dependent promoters; localization regulated by Ptp2p and Ptp3p Null mutant is viable and unable to grow in high osmolarity media YLR113W S000004103
YGR161C	-	-	0.912378	RTS3	Putative component of the protein phosphatase type 2A complex YGR161C S000003393
YHR162W	-	-	0.912284		NO_MATCH
YNL004W	-	-	0.910429	HRB1	TOM34 Poly(A+) RNA-binding protein, involved in the export of mRNAs from the nucleus to the cytoplasm; similar to Gbp2p and Npl3p YNL004W S000004949
YML058C-A	-	-	0.908239		NO_MATCH
YFL037W	-	-	0.905938	TUB2	ARM10|SHE8 Beta-tubulin; associates with alpha-tubulin (Tub1p and Tub3p) to form tubulin dimer, which polymerizes to form microtubules null is inviable; conditional mutants show block of mitotic nuclear migration and chromosome segregation and defects in spindle and/or cytoplasmic microtubules at non-permissive conditions; some mutants are benomyl-hypersensitive YFL037W S000001857
YAL036C	-	-	0.904965	RBG1	FUN11 Member of the DRG family of GTP-binding proteins; interacts with translating ribosomes and with Tma46p YAL036C S000000034
YPL230W	-	-	0.9044	USV1	Putative transcription factor containing a C2H2 zinc finger; mutation affects transcriptional regulation of genes involved in protein folding, ATP binding, and cell wall biosynthesis YPL230W S000006151
YCR053W	-	-	0.902	THR4	Threonine synthase, conserved protein that catalyzes formation of threonine from 0-phosphohomoserine; expression is regulated by the GCN4-mediated general amino acid control pathway threonine requiring YCR053W S000000649
YNL231C	-	-	0.894864	PDR16	SFH3 Phosphatidylinositol transfer protein (PITP) controlled by the multiple drug resistance regulator Pdr1p, localizes to lipid particles and microsomes, controls levels of various lipids, may regulate lipid synthesis, homologous to Pdr17p Null mutant is viable, exhibits hypersensitivity to azole inhibitors of ergosterol biosynthesis, alterations in sterol composition of the plasma membrane; pdr…
YJL102W	-	-	0.891557	MEF2	Mitochondrial elongation factor involved in translational elongation YJL102W S000003638
YKL185W	-	-	0.889559	ASH1	Zinc-finger inhibitor of HO transcription; mRNA is localized and translated in the distal tip of anaphase cells, resulting in accumulation of Ash1p in daughter cell nuclei and inhibition of HO expression; potential Cdc28p substrate Mutant ash1 daughters can transcribe HO and switch mating type YKL185W S000001668
YAL010C	-	-	0.883849	MDM10	FUN37 Subunit of both the Mdm10-Mdm12-Mmm1 complex and the mitochondrial sorting and assembly machinery (SAM complex); functions in both the general and Tom40p-specific pathways for import and assembly of outer membrane beta-barrel proteins Null mutant has short actin cables. Point mutants exhibit giant, spherical mitochondria and are defective for mitochondrial inheritance. YAL010C S000000008
YMR294W-A	-	-	0.880987		NO_MATCH
YBR294W	-	-	0.87689	SUL1	SFP2 High affinity sulfate permease; sulfate uptake is mediated by specific sulfate transporters Sul1p and Sul2p, which control the concentration of endogenous activated sulfate intermediates Null mutant unable to grow on media containing less than 5 mM sulfate. YBR294W S000000498
YLR099C	-	-	0.876264	ICT1	Lysophosphatidic acid acyltransferase, responsible for enhanced phospholipid synthesis during organic solvent stress; null displays increased sensitivity to Calcofluor white; highly expressed during organic solvent stress YLR099C S000004089
YNL121C	-	-	0.874589	TOM70	MAS70|MOM72|OMP1 Component (70 kDa) of the TOM (translocase of outer membrane) complex responsible for recognition and initial import steps for all mitochondrially directed proteins; acts as a receptor for incoming precursor proteins Null mutant is viable but exhibits defects in mitochondrial import YNL121C S000005065
YNL011C	-	-	0.873053		NO_MATCH
YPL265W	-	-	0.872303	DIP5	Dicarboxylic amino acid permease, mediates high-affinity and high-capacity transport of L-glutamate and L-aspartate; also a transporter for Gln, Asn, Ser, Ala, and Gly Null mutant is viable, exhibits loss of L-aspartate and L-glutamate uptake YPL265W S000006186
YLR294C	-	-	0.87087		NO_MATCH
YDL083C	-	-	0.869593	RPS16B	Protein component of the small (40S) ribosomal subunit; identical to Rps16Ap and has similarity to E. coli S9 and rat S16 ribosomal proteins YDL083C S000002241
YER150W	-	-	0.869525	SPI1	GPI-anchored cell wall protein involved in weak acid resistance; basal expression requires Msn2p/Msn4p; expression is induced under conditions of stress and during the diauxic shift; similar to Sed1p YER150W S000000952
YML081C-A	-	-	0.866099	ATP18	Subunit of the mitochondrial F1F0 ATP synthase, which is a large enzyme complex required for ATP synthesis; termed subunit I or subunit j; does not correspond to known ATP synthase subunits in other organisms Null mutant is viable, deficient in oligomycin-sensitive ATPase activity, and is unable to grow on nonfermentable carbon sources. YML081C-A S000007247
YGR173W	-	-	0.861074	RBG2	GIR1 Protein with similarity to mammalian developmentally regulated GTP-binding protein YGR173W S000003405
YKR013W	-	-	0.857333	PRY2	YFW12 Protein of unknown function, has similarity to Pry1p and Pry3p and to the plant PR-1 class of pathogen related proteins YKR013W S000001721
YPL262W	-	-	0.855268	FUM1	Fumarase, converts fumaric acid to L-malic acid in the TCA cycle; cytosolic and mitochondrial localization determined by the N-terminal mitochondrial targeting sequence and protein conformation; phosphorylated in mitochondria YPL262W S000006183
YBR297W	-	-	0.854071	MAL33	MAL3R|MALR MAL-activator protein, part of complex locus MAL3; nonfunctional in genomic reference strain S288C Defective maltose fermentation YBR297W S000000501
YBR222C	-	-	0.85356	PCS60	FAT2 Peroxisomal AMP-binding protein, localizes to both the peroxisomal peripheral membrane and matrix, expression is highly inducible by oleic acid, similar to E. coli long chain acyl-CoA synthetase YBR222C S000000426
YDL241W	-	-	0.851528		NO_MATCH
YMR214W	-	-	0.844612	SCJ1	One of several homologs of bacterial chaperone DnaJ, located in the ER lumen where it cooperates with Kar2p to mediate maturation of proteins Null mutant is viable but exhibits defects in protein sorting and sensitivity to tunicamycin. YMR214W S000004827
YMR051C	-	-	0.844353		NO_MATCH
YHR051W	-	-	0.843199	COX6	Subunit VI of cytochrome c oxidase, which is the terminal member of the mitochondrial inner membrane electron transport chain; expression is regulated by oxygen levels Null mutant is viable, sensitive to H2O2 YHR051W S000001093
YHL036W	-	-	0.837775	MUP3	Low affinity methionine permease, similar to Mup1p YHL036W S000001028
YMR318C	-	-	0.836534	ADH6	ADHVI NADPH-dependent medium chain alcohol dehydrogenase with broad substrate specificity; member of the cinnamyl family of alcohol dehydrogenases; may be involved in fusel alcohol synthesis or in aldehyde tolerance YMR318C S000004937
YFL056C	-	-	0.836534	AAD6	Putative aryl-alcohol dehydrogenase with similarity to P. chrysosporium aryl-alcohol dehydrogenase, involved in the oxidative stress response Responds to oxidative stress induced by diamide and di-ethyl maleic acid ester in YAP1 dependant manner YFL056C S000001838
YPL188W	-	-	0.836471	POS5	Mitochondrial NADH kinase, phosphorylates NADH; also phosphorylates NAD(+) with lower specificity; required for the response to oxidative stress pos5 mutants are peroxide sensitive YPL188W S000006109
YOR161C	-	-	0.836056	PNS1	Protein of unknown function; has similarity to Torpedo californica tCTL1p, which is postulated to be a choline transporter, neither null mutation nor overexpression affects choline transport YOR161C S000005687
YBR006W	-	-	0.835845	UGA2	UGA5 Succinate semialdehyde dehydrogenase involved in the utilization of gamma-aminobutyrate (GABA) as a nitrogen source; part of the 4-aminobutyrate and glutamate degradation pathways; localized to the cytoplasm Null mutant is viable but cannot grow with GABA as the only nitrogen source. YBR006W S000000210
YOL013W-A	-	-	0.835448		NO_MATCH
YMR195W	-	-	0.833702	ICY1	Protein of unknown function, required for viability in rich media of cells lacking mitochondrial DNA; mutants have an invasive growth defect with elongated morphology; induced by amino acid starvation YMR195W S000004808
YEL076C	-	-	0.830891		NO_MATCH
YMR034C	-	-	0.830491		NO_MATCH
YNL142W	-	-	0.828544	MEP2	Ammonium permease involved in regulation of pseudohyphal growth; belongs to a ubiquitous family of cytoplasmic membrane proteins that transport only ammonium (NH4+); expression is under the nitrogen catabolite repression regulation YNL142W S000005086
YKR069W	-	-	0.819253	MET1	MET20 S-adenosyl-L-methionine uroporphyrinogen III transmethylase, involved in the biosynthesis of siroheme, a prosthetic group used by sulfite reductase; required for sulfate assimilation and methionine biosynthesis Null mutant is viable, and is a methionine auxotroph YKR069W S000001777
YKR014C	-	-	0.818911	YPT52	GTPase, similar to Ypt51p and Ypt53p and to mammalian rab5; required for vacuolar protein sorting and endocytosis Null mutant is viable; ypt51 ypt52 double deletion exacerbates the temperature sensitivity and vacuolar protein sorting defects of ypt51 deletion YKR014C S000001722
YLR387C	-	-	0.815593	REH1	Protein of unknown function, similar to Rei1p but not involved in bud growth; contains dispersed C2H2 zinc finger domains YLR387C S000004379
YNL055C	-	-	0.813011	POR1	OMP2|YVDAC1 Mitochondrial porin (voltage-dependent anion channel), outer membrane protein required for the maintenance of mitochondrial osmotic stability and mitochondrial membrane permeability; phosphorylated Null mutant is viable, shows strain-dependent delayed growth on glycerol YNL055C S000005000
YOL106W	-	-	0.809322		NO_MATCH
YBR066C	-	-	0.801798	NRG2	Transcriptional repressor that mediates glucose repression and negatively regulates filamentous growth; has similarity to Nrg1p Null mutant is viable with no detected phenotypes YBR066C S000000270
YDR379W	-	-	0.799646	RGA2	GTPase-activating protein for the polarity-establishment protein Cdc42p; implicated in control of septin organization, pheromone response, and haploid invasive growth; regulated by Pho85p and Cdc28p Null mutants are viable but increase the restrictive temperature of a cdc24-4 strain and increase the constitutive activation of the pheromone response pathway in conjungtion with mutations in RGA1 an…
YOL126C	-	-	0.797101	MDH2	Cytoplasmic malate dehydrogenase, one of three isozymes that catalyze interconversion of malate and oxaloacetate; involved in the glyoxylate cycle and gluconeogenesis during growth on two-carbon compounds; interacts with Pck1p and Fbp1 Null mutant is viable; fails to grow on minimal medium with acetate or ethanol as carbon source YOL126C S000005486
YNL064C	-	-	0.796801	YDJ1	HSP40|MAS5 Protein chaperone involved in regulation of the HSP90 and HSP70 functions; involved in protein translocation across membranes; member of the DnaJ family slow growth at 23 degrees, inviable at 37 degrees; modest mitochondrial import defect at 23 degrees, substantial import defect at 37 degrees YNL064C S000005008
YHR209W	-	-	0.796163	CRG1	Putative S-adenosylmethionine-dependent methyltransferase; mediates cantharidin resistance YHR209W S000001252
YGL248W	-	-	0.796163	PDE1	Low-affinity cyclic AMP phosphodiesterase, controls glucose and intracellular acidification-induced cAMP signaling, target of the cAMP-protein kinase A (PKA) pathway; glucose induces transcription and inhibits translation YGL248W S000003217
YEL031W	+	+	0.794377	SPF1	COD1|PER9|PIO1 P-type ATPase, ion transporter of the ER membrane involved in ER function and Ca2+ homeostasis; required for regulating Hmg2p degradation; confers sensitivity to a killer toxin (SMKT) produced by Pichia farinosa KK1 The null mutant is viable and resistant to the SMK toxin, but grows slowly and has glycosylation defects. YEL031W S000000757
YOL161C	-	-	0.794377	PAU20	Hypothetical protein YOL161C S000005521
YEL029C	-	-	0.792086	BUD16	Putative pyridoxal kinase, key enzyme in vitamin B6 metabolism; involved in maintaining levels of pyridoxal 5'-phosphate, the active form of vitamin B6; required for genome integrity; homolog of E. coli PdxK; involved in bud-site selection YEL029C S000000755
YPL165C	-	-	0.789403	SET6	Protein of unknown function; deletion heterozygote is sensitive to compounds that target ergosterol biosynthesis, may be involved in compound availability YPL165C S000006086
YLR237W	-	-	0.78859	THI7	THI10 Plasma membrane transporter responsible for the uptake of thiamine, member of the major facilitator superfamily of transporters; mutation of human ortholog causes thiamine-responsive megaloblastic anemia Null mutant is viable, thi7 mutants are pyrithiamine resistant and cordycepin resistant YLR237W S000004227
YOR073W	-	-	0.78859	SGO1	YOR29-24 Component of the spindle checkpoint, involved in sensing lack of tension on mitotic chromosomes; protects centromeric Rec8p at meiosis I; required for accurate chromosomal segregation at meiosis II and for mitotic chromosome stability YOR073W S000005599
YIL043C	-	-	0.787056	CBR1	CBR5 Microsomal cytochrome b reductase, not essential for viability; also detected in mitochondria; mutation in conserved NADH binding domain of the human ortholog results in type I methemoglobinemia YIL043C S000001305
YGL077C	-	-	0.781168	HNM1	CTR1 Choline/ethanolamine transporter; involved in the uptake of nitrogen mustard and the uptake of glycine betaine during hypersaline stress; co-regulated with phospholipid biosynthetic genes and negatively regulated by choline and myo-inositol Null mutant is viable, but hyper-resistant to nitrogen mustard; ctr1,cho1 double null is inviable YGL077C S000003045
YMR208W	-	-	0.779646	ERG12	RAR1 Mevalonate kinase, acts in the biosynthesis of isoprenoids and sterols, including ergosterol, from mevalonate Null mutant is inviable and unable to grow vegetatively or germinate spores; mutants exhibit increased mitotic stability of plasmids with weak ARS elements. YMR208W S000004821
YOR121C	-	-	0.776948		NO_MATCH
YPL202C	-	+	0.775148	AFT2	Iron-regulated transcriptional activator; activates genes involved in intracellular iron use and required for iron homeostasis and resistance to oxidative stress; similar to Aft1p Null: Deletion of AFT2 exacerates iron deficiency of AFT1 disruption. YPL202C S000006123
YEL066W	-	-	0.774635	HPA3	D-Amino acid N-acetyltransferase, catalyzes N-acetylation of D-amino acids through ordered bi-bi mechanism in which acetyl-CoA is first substrate bound and CoA is last product liberated; similar to Hpa2p, acetylates histones weakly in vitro Null mutant is viable and does not show any detectable phenotype YEL066W S000000792
YKR025W	-	-	0.773891	RPC37	RNA polymerase III subunit C37 YKR025W S000001733
YIL135C	-	-	0.773048	VHS2	Cytoplasmic protein of unknown function; identified as a high-copy suppressor of the synthetic lethality of a sis2 sit4 double mutant, suggesting a role in G1/S phase progression; similar to Mlf3p YIL135C S000001397
YDL066W	-	-	0.767348	IDP1	Mitochondrial NADP-specific isocitrate dehydrogenase, catalyzes the oxidation of isocitrate to alpha-ketoglutarate; not required for mitochondrial respiration and may function to divert alpha-ketoglutarate to biosynthetic processes YDL066W S000002224
YGR066C	-	-	0.766611		NO_MATCH
YBL032W	-	-	0.765714	HEK2	KHD1 RNA binding protein with similarity to hnRNP-K that localizes to the cytoplasm and to subtelomeric DNA; required for the proper localization of ASH1 mRNA; involved in the regulation of telomere position effect and telomere length Null: ASH1 mRNA is partially delocalized YBL032W S000000128
YDR416W	-	-	0.764406	SYF1	NTC90 Component of the spliceosome complex involved in pre-mRNA splicing; involved in regulation of cell cycle progression; similar to Drosophila crooked neck protein YDR416W S000002824
YGL021W	-	-	0.759753	ALK1	Protein kinase; accumulation and phosphorylation are periodic during the cell cycle; phosphorylated in response to DNA damage; contains characteristic motifs for degradation via the APC pathway; similar to Alk2p and to mammalian haspins YGL021W S000002989
YNL268W	-	-	0.7592	LYP1	Lysine permease; one of three amino acid permeases (Alp1p, Can1p, Lyp1p) responsible for uptake of cationic amino acids YNL268W S000005212
YOL165C	-	-	0.758685	AAD15	Putative aryl-alcohol dehydrogenase with similarity to P. chrysosporium aryl-alcohol dehydrogenase; mutational analysis has not yet revealed a physiological role YOL165C S000005525
YMR307W	-	-	0.755623	GAS1	CWH52|GGP1 Beta-1,3-glucanosyltransferase, required for cell wall assembly; localizes to the cell surface via a glycosylphosphatidylinositol (GPI) anchor YMR307W S000004924
YGR146C	-	-	0.754323		NO_MATCH
YLR180W	-	-	0.749777	SAM1	ETH10 S-adenosylmethionine synthetase, catalyzes transfer of the adenosyl group of ATP to the sulfur atom of methionine; one of two differentially regulated isozymes (Sam1p and Sam2p) YLR180W S000004170
YDR304C	-	-	0.748371	CPR5	CYP5 Peptidyl-prolyl cis-trans isomerase (cyclophilin) of the endoplasmic reticulum, catalyzes the cis-trans isomerization of peptide bonds N-terminal to proline residues; transcriptionally induced in response to unfolded proteins in the ER YDR304C S000002712
YPL123C	-	-	0.746242	RNY1	RNAse; member of the T(2) family of endoribonucleases YPL123C S000006044
YBR128C	-	-	0.744416	ATG14	APG14|CVT12 Subunit of an autophagy-specific phosphatidylinositol 3-kinase complex (with Vps34p, Vps15p, and Vps30p) required for organization of a pre-autophagosomal structure; ATG14 transcription is activated by Gln3p during nitrogen starvation Null mutant is viable but defective in autophagy. YBR128C S000000332
YBR033W	-	-	0.742502	EDS1	Putative zinc cluster protein; YBR033W is not an essential gene Null: calcofluor resistant.. Other phenotypes: Deletion suppresses lysis defect of a swi4 deletion. YBR033W S000000237
YDL223C	-	-	0.741138	HBT1	Substrate of the Hub1p ubiquitin-like protein that localizes to the shmoo tip (mating projection); mutants are defective for mating projection formation, thereby implicating Hbt1p in polarized cell morphogenesis YDL223C S000002382
YIL070C	-	-	0.740172	MAM33	Acidic protein of the mitochondrial matrix involved in oxidative phosphorylation; related to the human complement receptor gC1q-R YIL070C S000001332
YDR064W	-	-	0.738326	RPS13	RPS13B|RPS13C Protein component of the small (40S) ribosomal subunit; has similarity to E. coli S15 and rat S13 ribosomal proteins YDR064W S000002471
YEL067C	-	-	0.736716		NO_MATCH
YMR038C	-	-	0.735744	CCS1	CCS|LYS7 Copper chaperone for superoxide dismutase Sod1p, involved in oxidative stress protection; Met-X-Cys-X2-Cys motif within the N-terminal portion is involved in insertion of copper into Sod1p under conditions of copper deprivation Null mutant is viable, methionine and lysine auxotroph, pH and temperature sensitive; sensitive to superoxide generating drugs and light irradiation, exhibits dim…
YBL048W	-	-	0.730611		NO_MATCH
YDR369C	-	-	0.729603	XRS2	Protein required for DNA repair; component of the Mre11 complex, which is involved in double strand breaks, meiotic recombination, telomere maintenance, and checkpoint signaling X-ray sensitive, spores inviable, xrs2 is rescued by spo13 and is epistatic to rad52 YDR369C S000002777
YIL011W	-	-	0.729003	TIR3	YIB1 Cell wall mannoprotein of the Srp1p/Tip1p family of serine-alanine-rich proteins; expressed under anaerobic conditions and required for anaerobic growth inviable under unaerobic conditions YIL011W S000001273
YBR035C	-	-	0.728727	PDX3	Pyridoxine (pyridoxamine) phosphate oxidase, has homologs in E. coli and Myxococcus xanthus; transcription is under the general control of nitrogen metabolism YBR035C S000000239
YDR117C	-	-	0.726607	TMA64	RBF64 Protein of unknown function that associates with ribosomes; has a putative RNA binding domain YDR117C S000002524
YOR209C	-	-	0.724995	NPT1	Nicotinate phosphoribosyltransferase, acts in the salvage pathway of NAD+ biosynthesis; required for silencing at rDNA and telomeres and has a role in silencing at mating-type loci; localized to the nucleus Mutations weaken silencing and also cause a reduction in the intracellular NAD(+) level. YOR209C S000005735
YGR055W	-	-	0.724199	MUP1	High affinity methionine permease, integral membrane protein with 13 putative membrane-spanning regions; also involved in cysteine uptake Null mutant is viable but cannot perform high-affinity methionine update. YGR055W S000003287
YFR030W	-	-	0.723504	MET10	Subunit alpha of assimilatory sulfite reductase, which is responsible for the conversion of sulfite into sulfide YFR030W S000001926
YLR051C	-	-	0.722404	FCF2	Essential nucleolar protein involved in the early steps of 35S rRNA processing; interacts with Faf1p; member of a transcriptionally co-regulated set of genes called the RRB regulon YLR051C S000004041
YJR025C	-	-	0.718785	BNA1	HAD1 3-hydroxyanthranilic acid dioxygenase, required for the de novo biosynthesis of NAD from tryptophan via kynurenine; expression regulated by Hst1p Null mutant is viable, nicotinic acid auxotroph. Deletion results in significant rDNA silencing defect only on medium deficient in nicotinic acid, an NAD(+) precursor. YJR025C S000003786
YDR502C	-	-	0.718783	SAM2	ETH2 S-adenosylmethionine synthetase, catalyzes transfer of the adenosyl group of ATP to the sulfur atom of methionine; one of two differentially regulated isozymes (Sam1p and Sam2p) YDR502C S000002910
YLR355C	-	-	0.716189	ILV5	Acetohydroxyacid reductoisomerase, mitochondrial protein involved in branched-chain amino acid biosynthesis, also required for maintenance of wild-type mitochondrial DNA and found in mitochondrial nucleoids Isoleucine-plus-valine requiring YLR355C S000004347
YAR071W	-	-	0.716162	PHO11	One of three repressible acid phosphatases, a glycoprotein that is transported to the cell surface by the secretory pathway; induced by phosphate starvation and coordinately regulated by PHO4 and PHO2 phosphatase deficient YAR071W S000000094
YER086W	-	-	0.715885	ILV1	ISO1 Threonine deaminase, catalyzes the first step in isoleucine biosynthesis; expression is under general amino acid control; ILV1 locus exhibits highly positioned nucleosomes whose organization is independent of known ILV1 regulation YER086W S000000888
YNR076W	-	-	0.715661	PAU6	Part of 23-member seripauperin multigene family encoded mainly in subtelomeric regions, active during alcoholic fermentation, regulated by anaerobiosis, negatively regulated by oxygen, repressed by heme YNR076W S000005359
YJL151C	-	-	0.715487	SNA3	Integral membrane protein localized to vacuolar intralumenal vesicles, computational analysis of large-scale protein-protein interaction data suggests a possible role in either cell wall synthesis or protein-vacuolar targeting Null mutant is viable, excretes inositol YJL151C S000003687
YAR068W	-	-	0.712642		NO_MATCH
YIR012W	-	-	0.710077	SQT1	Essential protein involved in a late step of 60S ribosomal subunit assembly or modification; contains multiple WD repeats; interacts with Qsr1p in a two-hybrid assay Null mutant is inviable. Loss of SQT1 function by down regulation from an inducible promoter results in formation of half-mer polyribosomes and descreased levels of Qsr1p on free 60S subunits YIR012W S000001451
YKL182W	-	-	0.705443	FAS1	Beta subunit of fatty acid synthetase, which catalyzes the synthesis of long-chain saturated fatty acids; contains acetyltransacylase, dehydratase, enoyl reductase, malonyl transacylase, and palmitoyl transacylase activities YKL182W S000001665
YIL111W	-	-	0.702082	COX5B	Subunit Vb of cytochrome c oxidase, which is the terminal member of the mitochondrial inner membrane electron transport chain; predominantly expressed during anaerobic growth while its isoform Va (Cox5Ap) is expressed during aerobic growth YIL111W S000001373
YLR312C	-	-	0.70011	QNQ1	Protein of unknown function; null mutant quiescent and non-quiescent cells exhibit reduced reproductive capacity YLR312C S000004303
YJL031C	-	-	0.697776	BET4	Alpha subunit of Type II geranylgeranyltransferase required for vesicular transport between the endoplasmic reticulum and the Golgi; provides a membrane attachment moiety to Rab-like proteins Ypt1p and Sec4p YJL031C S000003568
YOL064C	-	-	0.696755	MET22	HAL2 Bisphosphate-3'-nucleotidase, involved in salt tolerance and methionine biogenesis; dephosphorylates 3'-phosphoadenosine-5'-phosphate and 3'-phosphoadenosine-5'-phosphosulfate, intermediates of the sulfate assimilation pathway Methionine requiring; lacks 3'-phosphoadenylylsulfate (PAPS) reductase activity; unable to grow on sulfate as sole sulfur source; overexpression confers lithium resist…
YJR028W	-	-	0.694875		NO_MATCH
YPL271W	-	-	0.694258	ATP15	ATPEPSILON Epsilon subunit of the F1 sector of mitochondrial F1F0 ATP synthase, which is a large, evolutionarily conserved enzyme complex required for ATP synthesis; phosphorylated unable to grow on glycerol medium; no detectable oligomycin-sensitive ATPase activity; oligomycin-sensitive uncoupling of the mitochondrial respiration rate YPL271W S000006192
YMR093W	-	-	0.692213	UTP15	Nucleolar protein, component of the small subunit (SSU) processome containing the U3 snoRNA that is involved in processing of pre-18S rRNA YMR093W S000004699
YMR246W	-	-	0.68932	FAA4	Long chain fatty acyl-CoA synthetase, regulates protein modification during growth in the presence of ethanol, functions to incorporate palmitic acid into phospholipids and neutral lipids Not essential for vegetative growth when fatty acid synthase (fas) is active YMR246W S000004860
YGL251C	-	-	0.684706	HFM1	MER3 Meiosis specific DNA helicase involved in the conversion of double-stranded breaks to later recombination intermediates and in crossover control; catalyzes the unwinding of Holliday junctions; has ssDNA and dsDNA stimulated ATPase activity YGL251C S000003220
YBR086C	-	-	0.683143	IST2	Plasma membrane protein that may be involved in osmotolerance, localizes to the mother cell in small-budded cells and to the bud in medium- and large-budded cells; mRNA is transported to the bud tip by an actomyosin-driven process YBR086C S000000290
YLR028C	-	-	0.682592	ADE16	Enzyme of 'de novo' purine biosynthesis containing both 5-aminoimidazole-4-carboxamide ribonucleotide transformylase and inosine monophosphate cyclohydrolase activities, isozyme of Ade17p; ade16 ade17 mutants require adenine and histidine Null mutant is viable; ade16 ade17 double mutant requires adenine YLR028C S000004018
YHL011C	-	-	0.680954	PRS3	5-phospho-ribosyl-1(alpha)-pyrophosphate synthetase, involved in nucleotide, histidine, and tryptophan biosynthesis; one of five related enzymes, which are active as heteromultimeric complexes YHL011C S000001003
YKR006C	-	-	0.677913	MRPL13	YK105 Mitochondrial ribosomal protein of the large subunit, not essential for mitochondrial translation YKR006C S000001714
YNL104C	-	-	0.675397	LEU4	Alpha-isopropylmalate synthase (2-isopropylmalate synthase); the main isozyme responsible for the first step in the leucine biosynthesis pathway Null mutant is viable, Leu+ YNL104C S000005048
YMR094W	-	-	0.675157	CTF13	CBF3C Subunit of the CBF3 complex, which binds to the CDE III element of centromeres, bending the DNA upon binding, and may be involved in sister chromatid cohesion during mitosis YMR094W S000004700
YPL154C	-	-	0.673794	PEP4	PHO9|PRA1|yscA Vacuolar aspartyl protease (proteinase A), required for the posttranslational precursor maturation of vacuolar proteinases; important for protein turnover after oxidative damage; synthesized as a zymogen, self-activates Null mutant is viable, proteinase deficient, phosphatase deficient; pep4 mutants exhibit a 60-70% reduction in total protein degradation during sporulation YPL154C …
YMR256C	-	-	0.673564	COX7	Subunit VII of cytochrome c oxidase, which is the terminal member of the mitochondrial inner membrane electron transport chain Null mutant is viable, lacks cytochrome c oxidase activity and haem a/a3 spectra; respiratory deficient YMR256C S000004869
YPR043W	-	-	0.66263	RPL43A	Protein component of the large (60S) ribosomal subunit, identical to Rpl43Bp and has similarity to rat L37a ribosomal protein; null mutation confers a dominant lethal phenotype YPR043W S000006247
YIR018W	-	-	0.661888	YAP5	Basic leucine zipper (bZIP) transcription factor YIR018W S000001457
YJL163C	-	-	0.660979		NO_MATCH
YGL082W	-	-	0.660979		NO_MATCH
YBR145W	-	-	0.660965	ADH5	Alcohol dehydrogenase isoenzyme V; involved in ethanol production YBR145W S000000349
YPL282C	-	-	0.657221	PAU22	Hypothetical protein YPL282C S000006203
YGL105W	-	-	0.655899	ARC1	Protein that binds tRNA and methionyl- and glutamyl-tRNA synthetases (Mes1p and Gus1p), delivering tRNA to them, stimulating catalysis, and ensuring their localization to the cytoplasm; also binds quadruplex nucleic acids Null mutant is viable, leads to slow growth and reduced MetRS activity; arc1- mutants are synthetic lethals and are complemented by the genes for methionyl-tRNA and glutamyl-tRN…
YOL147C	-	-	0.655715	PEX11	PMP24|PMP27 Peroxisomal membrane protein required for peroxisome proliferation and medium-chain fatty acid oxidation, most abundant protein in the peroxisomal membrane, regulated by Adr1p and Pip2p-Oaf1p, promoter contains ORE and UAS1-like elements YOL147C S000005507
YMR202W	-	-	0.655444	ERG2	END11 C-8 sterol isomerase, catalyzes the isomerization of the delta-8 double bond to the delta-7 position at an intermediate step in ergosterol biosynthesis synthetic lethal with vma2. YMR202W S000004815
YJR155W	-	-	0.655142	AAD10	Putative aryl-alcohol dehydrogenase with similarity to P. chrysosporium aryl-alcohol dehydrogenase; mutational analysis has not yet revealed a physiological role YJR155W S000003916
YDR288W	-	-	0.655122	NSE3	Essential subunit of the Mms21-Smc5-Smc6 complex; protein of unknown function; required for DNA repair and growth YDR288W S000002696
YOR108W	-	-	0.653206	LEU9	Alpha-isopropylmalate synthase II (2-isopropylmalate synthase), catalyzes the first step in the leucine biosynthesis pathway; the minor isozyme, responsible for the residual alpha-IPMS activity detected in a leu4 null mutant YOR108W S000005634
YNL095C	-	-	0.652248		NO_MATCH
YKL138C	-	-	0.650535	MRPL31	Mitochondrial ribosomal protein of the large subunit YKL138C S000001621
YGL012W	-	-	0.644989	ERG4	C-24(28) sterol reductase, catalyzes the final step in ergosterol biosynthesis; mutants are viable, but lack ergosterol YGL012W S000002980
YBR005W	-	-	0.642739	RCR1	SSH6 Protein of the ER membrane involved in cell wall chitin deposition; may function in the endosomal-vacuolar trafficking pathway, helping determine whether plasma membrane proteins are degraded or routed to the plasma membrane YBR005W S000000209
YMR074C	-	-	0.640407		NO_MATCH
YPL012W	-	-	0.63704	RRP12	Protein required for export of the ribosomal subunits; associates with the RNA components of the pre-ribosomes; contains HEAT-repeats YPL012W S000005933
YKL133C	-	-	0.636432		NO_MATCH
YMR200W	-	-	0.634001	ROT1	Essential ER membrane protein; may be involved in protein folding; mutation causes defects in cell wall synthesis and in lysis of autophagic bodies, suppresses tor2 mutations, and is synthetically lethal with kar2-1 and with rot2 mutations Null mutant is inviable; rot1 mutations can suppress tor2 mutations; synthetically lethal with rot2 YMR200W S000004813
YKR016W	-	-	0.63089	AIM28	FMP13 Protein of unknown function; non-tagged protein is detected in purified mitochondria in high-throughput studies; null mutant displays decreased frequency of mitochondrial genome loss and severe growth defect in minimal glycerol media YKR016W S000001724
YFR017C	-	-	0.63081		NO_MATCH
YDR368W	-	-	0.63076	YPR1	2-methylbutyraldehyde reductase, may be involved in isoleucine catabolism YDR368W S000002776
YGR239C	-	-	0.630483	PEX21	Peroxin required for targeting of peroxisomal matrix proteins containing PTS2; interacts with Pex7p; partially redundant with Pex18p YGR239C S000003471
YHR055C	-	-	0.628641	CUP1-2	CUP1 Metallothionein, binds copper and mediates resistance to high concentrations of copper and cadmium; locus is variably amplified in different strains, with two copies, CUP1-1 and CUP1-2, in the genomic sequence reference strain S288C Copper resistance YHR055C S000001097
YLL044W	-	-	0.628617		NO_MATCH
YFR024C-A	-	-	0.626462	LSB3	YFR024C Protein containing a C-terminal SH3 domain; binds Las17p, which is a homolog of human Wiskott-Aldrich Syndrome protein involved in actin patch assembly and actin polymerization YFR024C-A S000002968
YCR014C	-	-	0.625588	POL4	POLX DNA polymerase IV, undergoes pair-wise interactions with Dnl4p-Lif1p and Rad27p to mediate repair of DNA double-strand breaks by non-homologous end joining (NHEJ); homologous to mammalian DNA polymerase beta Null mutant is viable but shows hyper-recombination, higher frequency of illegitimate mating, and weak sensitivity to MMS YCR014C S000000607
YHR139C	-	-	0.625186	SPS100	Protein required for spore wall maturation; expressed during sporulation; may be a component of the spore wall YHR139C S000001181
YDR120C	-	-	0.620856	TRM1	tRNA methyltransferase, localizes to both the nucleus and mitochondrion to produce the modified base N2,N2-dimethylguanosine in tRNAs in both compartments An uncharacterized allele affects a specific base modification of both cytoplasmic and mitochondrial tRNA. YDR120C S000002527
YBR029C	-	-	0.619047	CDS1	CDG1 Phosphatidate cytidylyltransferase (CDP-diglyceride synthetase); an enzyme that catalyzes that conversion of CTP + phosphate into diphosphate + CDP-diaclglyerol, a critical step in the synthesis of all major yeast phospholipids YBR029C S000000233
YDL061C	-	-	0.615402	RPS29B	YS29B Protein component of the small (40S) ribosomal subunit; nearly identical to Rps29Ap and has similarity to rat S29 and E. coli S14 ribosomal proteins YDL061C S000002219
YOR236W	-	-	0.615041	DFR1	Dihydrofolate reductase, part of the dTTP biosynthetic pathway, involved in folate metabolism, possibly required for mitochondrial function YOR236W S000005762
YBR067C	-	-	0.614437	TIP1	Major cell wall mannoprotein with possible lipase activity; transcription is induced by heat- and cold-shock; member of the Srp1p/Tip1p family of serine-alanine-rich proteins Null mutant is viable; exhibits increased sensitivity to calcoflour white and congo red YBR067C S000000271
YJL097W	-	-	0.613652	PHS1	Protein of unknown function; homolog of mammalian PTPLA; involved in sphingolipid biosynthesis, protein trafficking; required for cell viability YJL097W S000003633
YLR460C	-	-	0.613027		NO_MATCH
YNL219C	-	-	0.612679	ALG9	Mannosyltransferase, involved in N-linked glycosylation; catalyzes the transfer of mannose from Dol-P-Man to lipid-linked oligosaccharides; mutation of the human ortholog causes type 1 congenital disorders of glycosylation YNL219C S000005163
YML047C	-	-	0.611481	PRM6	Pheromone-regulated protein, predicted to have 2 transmembrane segments; regulated by Ste12p during mating YML047C S000004510
YOR099W	-	-	0.611314	KTR1	Alpha-1,2-mannosyltransferase involved in O- and N-linked protein glycosylation; type II membrane protein; member of the KRE2/MNT1 mannosyltransferase family YOR099W S000005625
YDR456W	-	+	0.608409	NHX1	NHA2|VPL27|VPS44 Endosomal Na+/H+ exchanger, required for intracellular sequestration of Na+; required for osmotolerance to acute hypertonic shock YDR456W S000002864
YLR040C	-	-	0.606882		NO_MATCH
YPR003C	-	-	0.603666		NO_MATCH
YFL024C	-	-	0.603332	EPL1	Component of NuA4, which is an essential histone H4/H2A acetyltransferase complex; homologous to Drosophila Enhancer of Polycomb YFL024C S000001870
YDR196C	-	-	0.602342		NO_MATCH
YDR358W	-	-	0.59297	GGA1	Golgi-localized protein with homology to gamma-adaptin, interacts with and regulates Arf1p and Arf2p in a GTP-dependent manner in order to facilitate traffic through the late Golgi Single and double knockouts are viable at both 30 C and 37 C. Cells lacking GGA1, GGA2 exhibit defects in invertase processing, vacuolar morphology, maturation of alpha-factor, and sorting of CPY, proteinase A to the v…
YBR115C	-	-	0.588943	LYS2	Alpha aminoadipate reductase, catalyzes the reduction of alpha-aminoadipate to alpha-aminoadipate 6-semialdehyde, which is the fifth step in biosynthesis of lysine; activation requires posttranslational phosphopantetheinylation by Lys5p Null mutant is viable, lysine auxotroph YBR115C S000000319
YBR069C	-	-	0.583988	TAT1	TAP1|VAP1 Amino acid transport protein for valine, leucine, isoleucine, and tyrosine, low-affinity tryptophan and histidine transporter; overexpression confers FK506 and FTY720 resistance overexpression confers resistance to the volatile anesthetic isoflurane. YBR069C S000000273
YBL054W	-	-	0.583298		NO_MATCH
YNL315C	-	-	0.582757	ATP11	Molecular chaperone, required for the assembly of alpha and beta subunits into the F1 sector of mitochondrial F1F0 ATP synthase greatly reduced ATPase activity; alpha and beta subunits of F1-ATPase accumulate in mitochondria as inactive aggregates YNL315C S000005259
YLR311C	-	-	0.581932		NO_MATCH
YDR134C	-	-	0.581256		NO_MATCH
YOR011W	-	-	0.579638	AUS1	Transporter of the ATP-binding cassette family, involved in uptake of sterols and anaerobic growth Null mutant is viable but exhibits reduced cholesterol accumulation. YOR011W S000005537
YPR149W	-	-	0.579057	NCE102	NCE2 Protein of unknown function; contains transmembrane domains; involved in secretion of proteins that lack classical secretory signal sequences; component of the detergent-insoluble glycolipid-enriched complexes (DIGs) An uncharacterized allele exhibits defects in the export of the mammalian protein galectin-1. YPR149W S000006353
YIR017C	-	-	0.578213	MET28	Transcriptional activator in the Cbf1p-Met4p-Met28p complex, participates in the regulation of sulfur metabolism Null mutant is viable but is a methionine-auxotroph and resistant to toxic analogs of sulfate. YIR017C S000001456
YDR518W	-	-	0.574836	EUG1	Protein disulfide isomerase of the endoplasmic reticulum lumen, function overlaps with that of Pdi1p; may interact with nascent polypeptides in the ER YDR518W S000002926
YLL058W	-	-	0.574005		NO_MATCH
YBR068C	-	-	0.573677	BAP2	High-affinity leucine permease, functions as a branched-chain amino acid permease involved in the uptake of leucine, isoleucine and valine; contains 12 predicted transmembrane domains reduced uptake of leucine, isoleucine, and valine YBR068C S000000272
YOL033W	-	-	0.573573	MSE1	Mitochondrial glutamyl-tRNA synthetase, encoded by a nuclear gene An uncharacterized allele is respiratory deficient. YOL033W S000005393
YBR149W	-	-	0.572306	ARA1	NADP+ dependent arabinose dehydrogenase, involved in carbohydrate metabolism; purified as homodimer; naturally occurs with a N-terminus degradation product Null mutant is viable but cannot produce D-arabinono-1,4-lactone, a precursor of D-erythroascorbic acid YBR149W S000000353
YLR352W	-	-	0.571957		NO_MATCH
YGR208W	-	-	0.570445	SER2	Phosphoserine phosphatase of the phosphoglycerate pathway, involved in serine and glycine biosynthesis, expression is regulated by the available nitrogen source serine-requiring YGR208W S000003440
YNL208W	-	-	0.569339		NO_MATCH
YGR202C	-	-	0.569303	PCT1	BSR2|CCT1 Cholinephosphate cytidylyltransferase, also known as CTP:phosphocholine cytidylyltransferase, rate-determining enzyme of the CDP-choline pathway for phosphatidylcholine synthesis, inhibited by Sec14p, activated upon lipid-binding YGR202C S000003434
YML035C	-	-	0.565208	AMD1	AMD3 AMP deaminase, tetrameric enzyme that catalyzes the deamination of AMP to form IMP and ammonia; may be involved in regulation of intracellular adenine nucleotide pools YML035C S000004498
YDR208W	-	-	0.564188	MSS4	Phosphatidylinositol-4-phosphate 5-kinase, involved in actin cytoskeleton organization and cell morphogenesis; multicopy suppressor of stt4 mutation YDR208W S000002616
YMR181C	-	-	0.562587		NO_MATCH
YDL003W	-	-	0.56218	MCD1	PDS3|RHC21|SCC1 Essential protein required for sister chromatid cohesion in mitosis and meiosis; subunit of the cohesin complex; expression is cell cycle regulated and peaks in S phase Null mutant is inviable; temperature sensitive mutants are defective in mitotic sister chromatid cohesion and mitotic chromosome condensation; multicopy suppressor of smc1-2 mutation YDL003W S000002161
YFL011W-A	-	-	0.559904		NO_MATCH
YOR245C	-	-	0.556231	DGA1	Diacylglycerol acyltransferase, catalyzes the terminal step of triacylglycerol (TAG) formation, acylates diacylglycerol using acyl-CoA as an acyl donor, localized to lipid particles YOR245C S000005771
YGR061C	-	-	0.556138	ADE6	Formylglycinamidine-ribonucleotide (FGAM)-synthetase, catalyzes a step in the 'de novo' purine nucleotide biosynthetic pathway Adenine requiring YGR061C S000003293
YGL016W	-	-	0.554512	KAP122	PDR6 Karyopherin beta, responsible for import of the Toa1p-Toa2p complex into the nucleus; binds to nucleoporins Nup1p and Nup2p; may play a role in regulation of pleiotropic drug resistance YGL016W S000002984
YJR078W	-	-	0.55421	BNA2	Putative tryptophan 2,3-dioxygenase or indoleamine 2,3-dioxygenase, required for the de novo biosynthesis of NAD from tryptophan via kynurenine; expression regulated by Hst1p and Aft2p Null: Nicotinic acid auxotroph. Other phenotypes: Deletion of the gene is co-lethal with the deletion of NPT1 YJR078W S000003839
YMR040W	-	-	0.553656	YET2	Protein of unknown function that may interact with ribosomes, based on co-purification experiments; homolog of human BAP31 protein YMR040W S000004643
YLL061W	-	-	0.551886	MMP1	High-affinity S-methylmethionine permease, required for utilization of S-methylmethionine as a sulfur source; has similarity to S-adenosylmethionine permease Sam3p Null mutant is viable but is unable to use S-methylmethionine as a sulfur source YLL061W S000003984
YLR388W	-	-	0.551786	RPS29A	YS29A Protein component of the small (40S) ribosomal subunit; nearly identical to Rps29Bp and has similarity to rat S29 and E. coli S14 ribosomal proteins YLR388W S000004380
YBL001C	-	-	0.55163	ECM15	Non-essential protein of unknown function, likely exists as tetramer, may be regulated by the binding of small-molecule ligands (possibly sulfate ions), may have a role in yeast cell-wall biogenesis A Tn3 insertion into this gene causes hypersensitivity to the cell surface polymer perturbing agent calcofluor white. YBL001C S000000097
YKL156W	-	-	0.550738	RPS27A	Protein component of the small (40S) ribosomal subunit; nearly identical to Rps27Bp and has similarity to rat S27 ribosomal protein YKL156W S000001639
YKR024C	-	-	0.550581	DBP7	Putative ATP-dependent RNA helicase of the DEAD-box family involved in ribosomal biogenesis YKR024C S000001732
YDL226C	-	-	0.550462	GCS1	ADP-ribosylation factor GTPase activating protein (ARF GAP), involved in ER-Golgi transport; shares functional similarity with Glo3p YDL226C S000002385
YJL222W	-	-	0.549342	VTH2	Putative membrane glycoprotein with strong similarity to Vth1p and Pep1p/Vps10p, may be involved in vacuolar protein sorting Null mutant is viable; overexpression of the nearly identical Vth1 partially suppresses the sorting defect of a pep1 null mutant strain. YJL222W S000003758
YFL013W-A	-	-	0.546693		NO_MATCH
YJR137C	-	-	0.543186	ECM17	MET5 Sulfite reductase beta subunit, involved in amino acid biosynthesis, transcription repressed by methionine loss of function mutants are methionine requiring and sensitive to the cell wall perturbing agent calcoflour white. YJR137C S000003898
YHR070W	-	-	0.542846	TRM5	tRNA(m(1)G37)methyltransferase, methylates a tRNA base adjacent to the anticodon that has a role in prevention of frameshifting; highly conserved across Archaea, Bacteria, and Eukarya YHR070W S000001112
YAL042W	-	-	0.541573	ERV46	FUN9 Protein localized to COPII-coated vesicles, forms a complex with Erv41p; involved in the membrane fusion stage of transport YAL042W S000000040
YAL008W	-	-	0.541111	FUN14	Mitochondrial protein of unknown function YAL008W S000000006
YGL076C	-	-	0.540373	RPL7A	Protein component of the large (60S) ribosomal subunit, nearly identical to Rpl7Bp and has similarity to E. coli L30 and rat L7 ribosomal proteins; contains a conserved C-terminal Nucleic acid Binding Domain (NDB2) Null mutant is viable; grows more slowly than wild-type YGL076C S000003044
YOL058W	-	-	0.537787	ARG1	ARG10 Arginosuccinate synthetase, catalyzes the formation of L-argininosuccinate from citrulline and L-aspartate in the arginine biosynthesis pathway; potential Cdc28p substrate Arginine requiring YOL058W S000005419
YHR215W	-	-	0.537705	PHO12	PHO10 One of three repressible acid phosphatases, a glycoprotein that is transported to the cell surface by the secretory pathway; nearly identical to Pho11p; upregulated by phosphate starvation YHR215W S000001258
YMR235C	-	-	0.535275	RNA1	GTPase activating protein (GAP) for Gsp1p, involved in nuclear transport inviable, RNA synthesis defective YMR235C S000004848
YDR224C	-	-	0.535275	HTB1	SPT12 One of two nearly identical (see HTB2) histone H2B subtypes required for chromatin assembly and chromosome function; Rad6p-Bre1p-Lge1p mediated ubiquitination regulates transcriptional activation, meiotic DSB formation and H3 methylation YDR224C S000002632
YMR027W	-	-	0.532582		NO_MATCH
YKL071W	-	-	0.531862		NO_MATCH
YCR097W-A	-	-	0.531637		NO_MATCH
YBL049W	-	-	0.530839	MOH1	Protein of unknown function, has homology to kinase Snf7p; not required for growth on nonfermentable carbon sources; essential for viability in stationary phase YBL049W S000000145
YGL037C	-	-	0.528601	PNC1	Nicotinamidase that converts nicotinamide to nicotinic acid as part of the NAD(+) salvage pathway, required for life span extension by calorie restriction; PNC1 expression responds to all known stimuli that extend replicative life span Null mutant is viable. Deletion causes silencing defect; does not significantly reduce intracellular NAD(+) concentration. Silencing in absence of PNC1 is dependen…
YGL234W	-	-	0.527966	ADE5,7	Bifunctional enzyme of the 'de novo' purine nucleotide biosynthetic pathway, contains aminoimidazole ribotide synthetase and glycinamide ribotide synthetase activities Adenine requiring YGL234W S000003203
YLL029W	-	-	0.526929	FRA1	RUP2 Protein involved in negative regulation of transcription of iron regulon; forms an iron independent complex with Fra2p, Grx3p, and Grx4p; cytosolic; mutant fails to repress transcription of iron regulon and is defective in spore formation YLL029W S000003952
YPL080C	-	-	0.526686		NO_MATCH
YKR051W	-	-	0.524435		NO_MATCH
YIL064W	-	-	0.52421		NO_MATCH
YGL180W	-	-	0.52194	ATG1	APG1|AUT3|CVT10 Protein serine/threonine kinase, required for vesicle formation during autophagy and the cytoplasm-to-vacuole targeting (Cvt) pathway; structurally required for pre-autophagosome formation; forms a complex with Atg13p and Atg17p Defective in autophagy; loses viability more rapidly than wild type during nitrogen starvation; defective in vacuolar protein degradation during nitrogen …
YPR021C	-	-	0.52131	AGC1	Mitochondrial amino acid transporter, acts both as a glutamate uniporter and as an aspartate-glutamate exchanger; involved in nitrogen metabolism and nitrogen compound biosynthesis Null: viable. Other phenotypes: not viable on minimal medium supplemented with acetate or oleate YPR021C S000006225
YNR050C	-	-	0.520242	LYS9	LYS13 Saccharopine dehydrogenase (NADP+, L-glutamate-forming); catalyzes the formation of saccharopine from alpha-aminoadipate 6-semialdehyde, which is the seventh step in lysine biosynthesis pathway lysine auxotroph YNR050C S000005333
YPL277C	-	-	0.520201		NO_MATCH
YBR039W	-	-	0.518207	ATP3	Gamma subunit of the F1 sector of mitochondrial F1F0 ATP synthase, which is a large, evolutionarily conserved enzyme complex required for ATP synthesis YBR039W S000000243
YIL030C	-	-	0.517019	SSM4	DOA10|KIS3 Ubiquitin-protein ligase of the ER/nuclear envelope, required for degradation of Alpha2p and other proteins containing a Deg1 degradation signal; ssm4 mutation suppresses mRNA instability caused by an rna14 mutation Null mutant is viable, suppresses temperature sensitive rna14 mutations; ssm4 sls1 mutants are inviable YIL030C S000001292
YCRX08W	-	-	0.517019		NO_MATCH
YER092W	-	-	0.516615	IES5	Protein that associates with the INO80 chromatin remodeling complex under low-salt conditions Null: non essential. YER092W S000000894
YGR050C	-	-	0.511103		NO_MATCH
YGR111W	-	-	0.51037		NO_MATCH
YLR429W	-	-	0.508061	CRN1	Coronin, cortical actin cytoskeletal component that associates with the Arp2p/Arp3p complex to regulate its activity; plays a role in regulation of actin patch assembly Overexpression of CRN1 causes growth arrest and redistribution of Arp2p and Crn1p into aberrant actin loops. YLR429W S000004421
YEL058W	-	-	0.506203	PCM1	AGM1 Essential N-acetylglucosamine-phosphate mutase; converts GlcNAc-6-P to GlcNAc-1-P, which is a precursor for the biosynthesis of chitin and for the formation of N-glycosylated mannoproteins and glycosylphosphatidylinositol anchors Null mutant is inviable; a Ty insertion mutant exhibits slow growth. YEL058W S000000784
YJL180C	-	-	0.505575	ATP12	Conserved protein required for assembly of alpha and beta subunits into the F1 sector of mitochondrial F1F0 ATP synthase; mutation of human ATP12 reduces active ATP synthase levels and is associated with the disorder ATPAF2 deficiency greatly reduced ATPase activity; alpha and beta subunits of F1-ATPase accumulate in mitochondria as inactive aggregates YJL180C S000003716
YHR005C-A	-	-	0.504002	MRS11	TIM10 Essential protein of the mitochondrial intermembrane space, forms a complex with Tim9p (TIM10 complex) that mediates insertion of hydrophobic proteins at the inner membrane, has homology to Mrs5p, which is also involved in this process Null mutant is inviable; depletion of Mrs11p results in accumulation of the precursor form of mitochondrial hsp60, inability to form spectrophotometrically d…
YLR194C	-	-	0.503346		NO_MATCH
YGR109C	-	-	0.503341	CLB6	B-type cyclin involved in DNA replication during S phase; activates Cdc28p to promote initiation of DNA synthesis; functions in formation of mitotic spindles along with Clb3p and Clb4p; most abundant during late G1 YGR109C S000003341
YKR097W	-	-	0.502101	PCK1	JPM2|PPC1 Phosphoenolpyruvate carboxykinase, key enzyme in gluconeogenesis, catalyzes early reaction in carbohydrate biosynthesis, glucose represses transcription and accelerates mRNA degradation, regulated by Mcm1p and Cat8p, located in the cytosol YKR097W S000001805
YOL088C	-	-	0.501435	MPD2	Member of the protein disulfide isomerase (PDI) family, exhibits chaperone activity; overexpression suppresses the lethality of a pdi1 deletion but does not complement all Pdi1p functions; undergoes oxidation by Ero1p Null mutant is viable; overproduction of Mpd2p suppresses lethality and carboxypeptidase Y maturation defect caused by pdi1 deletion -- this suppression depends on the CXXC sequence…
YDR184C	-	-	0.49965	ATC1	LIC4 Nuclear protein, possibly involved in regulation of cation stress responses and/or in the establishment of bipolar budding pattern YDR184C S000002592
YPL090C	-	-	0.49874	RPS6A	Protein component of the small (40S) ribosomal subunit; identical to Rps6Bp and has similarity to rat S6 ribosomal protein YPL090C S000006011
YBL101C	-	-	0.498522	ECM21	Non-essential protein of unknown function; promoter contains several Gcn4p binding elements A Tn3 insertion into this gene causes hypersensitivity to the cell surface polymer perturbing agent calcofluor white. YBL101C S000000197
YLR209C	-	-	0.497397	PNP1	Purine nucleoside phosphorylase, specifically metabolizes inosine and guanosine nucleosides; involved in the nicotinamide riboside salvage pathway null mutants excrete inosine and guanosine into the growth medium YLR209C S000004199
YMR189W	-	-	0.497029	GCV2	GSD2 P subunit of the mitochondrial glycine decarboxylase complex, required for the catabolism of glycine to 5,10-methylene-THF; expression is regulated by levels of 5,10-methylene-THF in the cytoplasm Inability to convert glycine to serine (ser1 background); Inability to utilize glycine as a nitogen source. YMR189W S000004801
YJL113W	-	-	0.494868		NO_MATCH
YDR451C	-	-	0.492351	YHP1	One of two homeobox transcriptional repressors (see also Yox1p), that bind to Mcm1p and to early cell cycle box (ECB) elements of cell cycle regulated genes, thereby restricting ECB-mediated transcription to the M/G1 interval YDR451C S000002859
YOR031W	-	-	0.492238	CRS5	Copper-binding metallothionein, required for wild-type copper resistance Null mutant is viable, exhibits increased sensitivity to copper toxicity YOR031W S000005557
YER081W	-	-	0.490341	SER3	3-phosphoglycerate dehydrogenase, catalyzes the first step in serine and glycine biosynthesis; isozyme of Ser33p Null: enzyme activity of 3P-glycerate dehydrogenase is decreased in null mutant compared to wildtype and abolished in ser3 ser33 double deletion mutant YER081W S000000883
YER154W	-	-	0.489568	OXA1	PET1402 Mitochondrial inner membrane insertase, mediates the insertion of both mitochondrial- and nuclear-encoded proteins from the matrix into the inner membrane, interacts with mitochondrial ribosomes; conserved from bacteria to animals YER154W S000000956
YDL027C	-	-	0.487802		NO_MATCH
YLR258W	-	-	0.487352	GSY2	Glycogen synthase, similar to Gsy1p; expression induced by glucose limitation, nitrogen starvation, heat shock, and stationary phase; activity regulated by cAMP-dependent, Snf1p and Pho85p kinases as well as by the Gac1p-Glc7p phosphatase Null mutant is viable. Mutant lacking both GSY1 and GSY2 is viable but lacks glycogen synthase activity and glycogen deposition YLR258W S000004248
YBL015W	-	-	0.486341	ACH1	Acetyl-coA hydrolase, primarily localized to mitochondria; phosphorylated; required for acetate utilization and for diploid pseudohyphal growth YBL015W S000000111
YFL022C	-	-	0.484949	FRS2	Alpha subunit of cytoplasmic phenylalanyl-tRNA synthetase, forms a tetramer with Frs1p to form active enzyme; evolutionarily distant from mitochondrial phenylalanyl-tRNA synthetase based on protein sequence, but substrate binding is similar YFL022C S000001872
YOR071C	-	-	0.483947	NRT1	THI71|YOR29-22 High-affinity nicotinamide riboside transporter; also transports thiamine with low affinity; shares sequence similarity with Thi7p and Thi72p; proposed to be involved in 5-fluorocytosine sensitivity YOR071C S000005597
YDR135C	-	-	0.48309	YCF1	Vacuolar glutathione S-conjugate transporter of the ATP-binding cassette family, has a role in detoxifying metals such as cadmium, mercury, and arsenite; also transports unconjugated bilirubin; similar to human cystic fibrosis protein CFTR Null mutant is viable, hypersensitive to cadmium YDR135C S000002542
YCR100C	-	-	0.482662		NO_MATCH
YGR117C	-	-	0.477677		NO_MATCH
YDR408C	-	-	0.476718	ADE8	Phosphoribosyl-glycinamide transformylase, catalyzes a step in the 'de novo' purine nucleotide biosynthetic pathway Adenine requiring YDR408C S000002816
YGR160W	-	-	0.476676		NO_MATCH
YDR515W	-	+	0.474732	SLF1	SRO99 RNA binding protein that associates with polysomes; proposed to be involved in regulating mRNA translation; involved in the copper-dependent mineralization of copper sulfide complexes on cell surface in cells cultured in copper salts YDR515W S000002923
YLR229C	-	-	0.474564	CDC42	Small rho-like GTPase, essential for establishment and maintenance of cell polarity; mutants have defects in the organization of actin and septins Null mutant is inviable; temperature sensitive mutations unable to form buds and display delocalized cell-surface deposition at the restrictive temperature YLR229C S000004219
YLR449W	-	-	0.473594	FPR4	Peptidyl-prolyl cis-trans isomerase (PPIase) (proline isomerase) localized to the nucleus; catalyzes isomerization of proline residues in histones H3 and H4, which affects lysine methylation of those histones YLR449W S000004441
YPR103W	-	-	0.473512	PRE2	DOA3|PRG1|SRR2 Beta 5 subunit of the 20S proteasome, responsible for the chymotryptic activity of the proteasome Null mutant is inviable, pre2 mutants exhibit defects in chymotrypsin-like proteolysis, stress response and ubiquitin signaled protein degradation YPR103W S000006307
YNL279W	-	-	0.473512	PRM1	Pheromone-regulated multispanning membrane protein involved in membrane fusion during mating; predicted to have 5 transmembrane segments and a coiled coil domain; localizes to the shmoo tip; regulated by Ste12p Null mutant is viable but exhibits a mating defect. YNL279W S000005223
YKL001C	-	-	0.469977	MET14	Adenylylsulfate kinase, required for sulfate assimilation and involved in methionine metabolism Null mutant is viable, and is a methionine auxotroph YKL001C S000001484
YGR046W	-	-	0.46747	TAM41	MMP37 Mitochondrial protein involved in protein import into the mitochondrial matrix; maintains the functional integrity of the TIM23 protein translocator complex; viability of null mutant is strain-dependent; mRNA is targeted to the bud YGR046W S000003278
YGR220C	-	-	0.466501	MRPL9	Mitochondrial ribosomal protein of the large subunit YGR220C S000003452
YNL037C	-	-	0.464233	IDH1	Subunit of mitochondrial NAD(+)-dependent isocitrate dehydrogenase, which catalyzes the oxidation of isocitrate to alpha-ketoglutarate in the TCA cycle Null mutant is viable, grows at a reduced rate on glycerol, lactate, and acetate YNL037C S000004982
YDR300C	-	-	0.464187	PRO1	Gamma-glutamyl kinase, catalyzes the first step in proline biosynthesis Proline requiring and unable to grow on YPD (yeast extract-peptone-glucose) YDR300C S000002708
YGR240C	-	-	0.463938	PFK1	Alpha subunit of heterooctameric phosphofructokinase involved in glycolysis, indispensable for anaerobic growth, activated by fructose-2,6-bisphosphate and AMP, mutation inhibits glucose induction of cell cycle-related genes Null mutant is viable, accumulates fructose-6-phosphate, glucose-6-phosphate, and sedoheptulose-7-phosphate, exhibits decreased levels of fructose-1,6-bisphosphate; pfk1 pfk2…
YJR142W	-	-	0.462939		NO_MATCH
YNL300W	-	-	0.462608		NO_MATCH
YPR167C	-	-	0.461348	MET16	3'-phosphoadenylsulfate reductase, reduces 3'-phosphoadenylyl sulfate to adenosine-3',5'-bisphosphate and free sulfite using reduced thioredoxin as cosubstrate, involved in sulfate assimilation and methionine metabolism Null mutant is viable, and is a methionine auxotroph YPR167C S000006371
YAL062W	-	-	0.461041	GDH3	FUN51 NADP(+)-dependent glutamate dehydrogenase, synthesizes glutamate from ammonia and alpha-ketoglutarate; rate of alpha-ketoglutarate utilization differs from Gdh1p; expression regulated by nitrogen and carbon sources YAL062W S000000058
YDR011W	-	-	0.460602	SNQ2	Plasma membrane ATP-binding cassette (ABC) transporter, multidrug transporter involved in multidrug resistance and resistance to singlet oxygen species null mutant is viable; overexpression confers multi-drug resistance YDR011W S000002418
YHR013C	-	-	0.459711	ARD1	Subunit of the N-terminal acetyltransferase NatA (Nat1p, Ard1p, Nat5p); N-terminally acetylates many proteins, which influences multiple processes such as the cell cycle, heat-shock resistance, mating, sporulation, and telomeric silencing YHR013C S000001055
YLL008W	-	-	0.4571	DRS1	Nucleolar DEAD-box protein required for ribosome assembly and function, including synthesis of 60S ribosomal subunits; constituent of 66S pre-ribosomal particles YLL008W S000003931
YIL094C	-	-	0.456363	LYS12	LYS10|LYS11 Homo-isocitrate dehydrogenase, an NAD-linked mitochondrial enzyme required for the fourth step in the biosynthesis of lysine, in which homo-isocitrate is oxidatively decarboxylated to alpha-ketoadipate Null mutant is viable but shows decreased growth in the absence of lysine YIL094C S000001356
YLR327C	-	-	0.456253	TMA10	RBF9 Protein of unknown function that associates with ribosomes YLR327C S000004319
YHR053C	-	-	0.455987	CUP1-1	CUP1 Metallothionein, binds copper and mediates resistance to high concentrations of copper and cadmium; locus is variably amplified in different strains, with two copies, CUP1-1 and CUP1-2, in the genomic sequence reference strain S288C Copper resistance YHR053C S000001095
YOL031C	-	-	0.455744	SIL1	SLS1 Nucleotide exchange factor for the endoplasmic reticulum (ER) lumenal Hsp70 chaperone Kar2p, required for protein translocation into the ER; homolog of Yarrowia lipolytica SLS1; GrpE-like protein YOL031C S000005391
YFL054C	-	-	0.455101		NO_MATCH
YNL034W	-	-	0.454534		NO_MATCH
YHL046C	-	-	0.451876	PAU13	Putative protein of unknown function; not an essential gene YHL046C S000001038
YKL106W	-	-	0.451555	AAT1	Mitochondrial aspartate aminotransferase, catalyzes the conversion of oxaloacetate to aspartate in aspartate and asparagine biosynthesis Null mutant is viable; aat1 leu2 double mutant is inviable. YKL106W S000001589
YPL212C	-	-	0.449255	PUS1	tRNA:pseudouridine synthase, introduces pseudouridines at positions 26-28, 34-36, 65, and 67 of tRNA; nuclear protein that appears to be involved in tRNA export; also acts on U2 snRNA pus1 los1 double mutant exhibits loss of suppressor tRNA activity; pus1, los1 and nsp1 mutations cause synthetic lethality YPL212C S000006133
YBR195C	-	-	0.445294	MSI1	CAC3 Subunit of chromatin assembly factor I (CAF-1), negative regulator of the RAS/cAMP pathway via sequestration of Npr1p kinase; localizes to the nucleus and cytoplasm; homologous to human retinoblastoma binding proteins RbAp48 and RbAp46 YBR195C S000000399
YPL088W	-	-	0.444304		NO_MATCH
YOR001W	-	-	0.442376	RRP6	Exonuclease component of the nuclear exosome; contributes to the quality-control system that retains and degrades aberrant mRNAs in the nucleus Null mutant is viable, heat sensitive; other mutants show a 5.8S rRNA 3' end formation defect YOR001W S000005527
YBL022C	-	-	0.442121	PIM1	LON1 ATP-dependent Lon protease, involved in degradation of misfolded proteins in mitochondria; required for biogenesis and maintenance of mitochondria no growth on non-fermentable carbon sources; unable to maintain mDNA YBL022C S000000118
YBR162C	-	-	0.441098	TOS1	Covalently-bound cell wall protein of unknown function; identified as a cell cycle regulated SBF target gene; deletion mutants are highly resistant to treatment with beta-1,3-glucanase; has sequence similarity to YJL171C YBR162C S000000366
YJR130C	-	-	0.440503	STR2	Cystathionine gamma-synthase, converts cysteine into cystathionine Null mutant is viable but unable to turn cysteine into homocysteine. Grows when supplied with cystathionine. YJR130C S000003891
YBR111C	-	-	0.4404	YSA1	RMA2 Nudix hydrolase family member with ADP-ribose pyrophosphatase activity YBR111C S000000315
YLR222C	-	-	0.433828	UTP13	Nucleolar protein, component of the small subunit (SSU) processome containing the U3 snoRNA that is involved in processing of pre-18S rRNA YLR222C S000004212
YDL101C	-	-	0.433503	DUN1	Cell-cycle checkpoint serine-threonine kinase required for DNA damage-induced transcription of certain target genes, phosphorylation of Rad55p and Sml1p, and transient G2/M arrest after DNA damage; also regulates postreplicative DNA repair Null mutant is viable, defective in DNA damage repair and DNA damage-resposive induction of RNR genes, and sensitive to DNA damaging agents. dun1pan2 and dun1p…
YPL015C	-	-	0.432377	HST2	Cytoplasmic member of the silencing information regulator 2 (Sir2) family of NAD(+)-dependent protein deacetylases; modulates nucleolar (rDNA) and telomeric silencing; possesses NAD(+)-dependent histone deacetylase activity in vitro YPL015C S000005936
YHR004C	-	-	0.431962	NEM1	Catalytic subunit of Nem1p-Spo7p phosphatase holoenzyme, which regulates nuclear growth by controlling recruitment of Pah1p onto promoters of phospholipid biosynthetic genes; required for normal nuclear envelope morphology and sporulation Null mutant is viable but exhibits slow growth at 37 deg. and 16 deg and has an abnormal nuclear envelope. Homozygous diploid null mutants exhibit defects in sp…
YLR433C	+	+	0.430946	CNA1	CMP1 Calcineurin A; one isoform (the other is CMP2) of the catalytic subunit of calcineurin, a Ca++/calmodulin-regulated protein phosphatase which regulates Crz1p (a stress-response transcription factor), the other calcineurin subunit is CNB1 YLR433C S000004425
YMR304W	-	-	0.429383	UBP15	Ubiquitin-specific protease that may play a role in ubiquitin precursor processing YMR304W S000004920
YGL101W	-	-	0.429168		NO_MATCH
YHL044W	-	-	0.428717		NO_MATCH
YGL058W	-	-	0.428243	RAD6	PSO8|UBC2 Ubiquitin-conjugating enzyme (E2), involved in postreplication repair (with Rad18p), sporulation, telomere silencing, and ubiquitin-mediated N-end rule protein degradation (with Ubr1p) Radiation sensitive. Defective for postreplication repair, repression of retrotransposition, meiotic gene conversion and sporulation. Mutations in srs2 suppress rad6 radiation-sensitivity but not the spor…
YJL051W	-	-	0.428243	IRC8	Bud tip localized protein of unknown function; mRNA is targeted to the bud by a She2p dependent transport system; mRNA is cell cycle regulated via Fkh2p, peaking in G2/M phase; null mutant displays increased levels of spontaneous Rad52p foc YJL051W S000003587
YCR083W	-	-	0.42645	TRX3	Mitochondrial thioredoxin, highly conserved oxidoreductase required to maintain the redox homeostasis of the cell, forms the mitochondrial thioredoxin system with Trr2p, redox state is maintained by both Trr2p and Glr1p Null mutant is viable, normal sensitivity to hydrogen peroxide YCR083W S000000679
YDR399W	-	-	0.425483	HPT1	BRA6|HPRT Dimeric hypoxanthine-guanine phosphoribosyltransferase, catalyzes the formation of both inosine monophosphate and guanosine monophosphate; mutations in the human homolog HPRT1 can cause Lesch-Nyhan syndrome and Kelley-Seegmiller syndrome YDR399W S000002807
YHR204W	-	-	0.425062	MNL1	HTM1 Alpha mannosidase-like protein of the endoplasmic reticulum required for degradation of glycoproteins but not for processing of N-linked oligosaccharides YHR204W S000001247
YHR140W	-	-	0.423228		NO_MATCH
YHR133C	-	-	0.422269	NSG1	Protein involved in regulation of sterol biosynthesis; specifically stabilizes Hmg2p, one of two HMG-CoA isoenzymes that catalyze the rate-limiting step in sterol biosynthesis; homolog of mammalian INSIG proteins Null: none YHR133C S000001175
YGR213C	-	-	0.422181	RTA1	Protein involved in 7-aminocholesterol resistance; has seven potential membrane-spanning regions Null mutant is viable; overexpression confers resistance to 7-aminocholesterol YGR213C S000003445
YGR182C	-	-	0.421156		NO_MATCH
YOR202W	-	-	0.419656	HIS3	HIS10 Imidazoleglycerol-phosphate dehydratase, catalyzes the sixth step in histidine biosynthesis; mutations cause histidine auxotrophy and sensitivity to Cu, Co, and Ni salts; transcription is regulated by general amino acid control via Gcn4p Null mutant is viable and requires histidine YOR202W S000005728
YGL259W	-	-	0.417548	YPS5	Protein with similarity to GPI-anchored aspartic proteases such as Yap1p and Yap3p YGL259W S000003228
YFL014W	-	-	0.41641	HSP12	GLP1|HOR5 Plasma membrane localized protein that protects membranes from desiccation; induced by heat shock, oxidative stress, osmostress, stationary phase entry, glucose depletion, oleate and alcohol; regulated by the HOG and Ras-Pka pathways Null mutant is viable, but shows induction of heat shock response under conditions normally associated with low-level HSP12 expression YFL014W S000001880
YPL045W	-	-	0.416182	VPS16	SVL6|VAM9|VPT16 Subunit of the vacuole fusion and protein sorting HOPS complex and the CORVET tethering complex; part of the Class C Vps complex essential for membrane docking and fusion at Golgi-to-endosome and endosome-to-vacuole protein transport stages Null mutant is viable, has a severe defect in vacuolar protein sorting, is temperature sensitive for growth, displays grossly abnormal vacuola…
YMR174C	-	-	0.414989	PAI3	Cytoplasmic proteinase A (Pep4p) inhibitor, dependent on Pbs2p and Hog1p protein kinases for osmotic induction; intrinsically unstructured, N-terminal half becomes ordered in the active site of proteinase A upon contact Null mutant is viable but shows increased rate of protein degradation YMR174C S000004786
YBR012W-A	-	-	0.41443		NO_MATCH
YNR043W	-	-	0.413979	MVD1	ERG19 Mevalonate pyrophosphate decarboxylase, essential enzyme involved in the biosynthesis of isoprenoids and sterols, including ergosterol; acts as a homodimer Null mutant is inviable; a single leucine to proline mutation causes temperature sensitivity. YNR043W S000005326
YPR048W	-	-	0.413001	TAH18	Protein with a potential role in DNA replication; displays synthetic lethal genetic interaction with the pol3-13 allele of POL3, which encodes DNA polymerase delta tah18-1 mutant is hypersensitive to hydroxyurea, camptothecin when overexpressing wild-type TOP1, and has a slow growth phenotype YPR048W S000006252
YOL018C	-	-	0.411551	TLG2	Syntaxin-like t-SNARE that forms a complex with Tlg1p and Vti1p and mediates fusion of endosome-derived vesicles with the late Golgi; binds Vps45p, which prevents Tlg2p degradation and also facilitates t-SNARE complex formation Null mutant is viable in SEY6210, exhibits endocytosis defect and loss of Kex2p YOL018C S000005378
YPL156C	-	-	0.411529	PRM4	Pheromone-regulated protein, predicted to have 1 transmembrane segment; transcriptionally regulated by Ste12p during mating and by Cat8p during the diauxic shift YPL156C S000006077
YER118C	-	-	0.410894	SHO1	SSU81 Transmembrane osmosensor, participates in activation of both the Cdc42p- and MAP kinase-dependent filamentous growth pathway and the high-osmolarity glycerol response pathway Null mutant is viable; mutants are high-osmolarity sensitive when combined with both ssk2 and ssk22 YER118C S000000920
YCL050C	-	-	0.410778	APA1	DTP1 Diadenosine 5',5''-P1,P4-tetraphosphate phosphorylase I (AP4A phosphorylase), involved in catabolism of bis(5'-nucleosidyl) tetraphosphates; has similarity to Apa2p YCL050C S000000555
YCR103C	-	-	0.40937		NO_MATCH
YIR011C	-	-	0.407621	STS1	DBF8|SSM5 Protein that interacts with the karyopherin Srp1p; may have a role with Srp1p in ubiquitin-mediated protein degradation YIR011C S000001450
YNL080C	-	-	0.40738	EOS1	Protein involved in N-glycosylation; deletion mutation confers sensitivity to exidative stress and shows synthetic lethality with mutations in the spindle checkpoint genes BUB3 and MAD1; YNL080C is not an essential gene YNL080C S000005024
YLR414C	-	-	0.407329		NO_MATCH
YDL168W	-	-	0.406751	SFA1	ADH5 Bifunctional enzyme containing both alcohol dehydrogenase and glutathione-dependent formaldehyde dehydrogenase activities, functions in formaldehyde detoxification and formation of long chain and complex alcohols, regulated by Hog1p-Sko1p YDL168W S000002327
YDR473C	-	-	0.40442	PRP3	RNA3 Splicing factor, component of the U4/U6-U5 snRNP complex RNA synthesis defective YDR473C S000002881
YNR065C	-	-	0.403738		NO_MATCH
YER056C-A	-	-	0.403388	RPL34A	Protein component of the large (60S) ribosomal subunit, nearly identical to Rpl34Bp and has similarity to rat L34 ribosomal protein YER056C-A S000002135
YPR163C	-	-	0.402129	TIF3	RBL3|STM1 Translation initiation factor eIF-4B, has RNA annealing activity; contains an RNA recognition motif and binds to single-stranded RNA YPR163C S000006367
YBR030W	-	-	0.400744		NO_MATCH
YAL001C	-	-	0.398172	TFC3	FUN24|TSV115 Largest of six subunits of the RNA polymerase III transcription initiation factor complex (TFIIIC); part of the TauB domain of TFIIIC that binds DNA at the BoxB promoter sites of tRNA and similar genes; cooperates with Tfc6p in DNA binding YAL001C S000000001
YLR422W	-	-	0.398172		NO_MATCH
YIL173W	-	-	0.397846	VTH1	Putative membrane glycoprotein with strong similarity to Vth2p and Pep1p/Vps10p, may be involved in vacuolar protein sorting Null mutant is viable; overexpression partially suppresses the sorting defect of a pep1 null mutant. YIL173W S000001435
YBR177C	-	-	0.395132	EHT1	Acyl-coenzymeA:ethanol O-acyltransferase that plays a minor role in medium-chain fatty acid ethyl ester biosynthesis; possesses short-chain esterase activity; localizes to lipid particles and the mitochondrial outer membrane Null mutant is viable, temperature sensitive, and contains higher amounts of phosphatidylinositol, phosphatidic acid, and ergosteryl esters YBR177C S000000381
YLR203C	-	-	0.394704	MSS51	Nuclear encoded protein required for translation of COX1 mRNA; binds to Cox1 protein necessary for cox1 pre-mRNA processing and translation YLR203C S000004193
YAL049C	-	-	0.390055	AIM2	Cytoplasmic protein of unknown function, potential Hsp82p interactor; null mutant displays decreased frequency of mitochondrial genome loss (petite formation) YAL049C S000000047
YBR071W	-	-	0.387929		NO_MATCH
YKL097W-A	-	+	0.387622		NO_MATCH
YPL278C	-	-	0.386934		NO_MATCH
YKR092C	-	-	0.386505	SRP40	Nucleolar, serine-rich protein with a role in preribosome assembly or transport; may function as a chaperone of small nucleolar ribonucleoprotein particles (snoRNPs); immunologically and structurally to rat Nopp140 YKR092C S000001800
YDR253C	-	-	0.385261	MET32	Zinc-finger DNA-binding protein, involved in transcriptional regulation of the methionine biosynthetic genes, similar to Met31p YDR253C S000002661
YPR133W-A	-	-	0.38462	TOM5	MOM8A Small mitochondrial outer membrane protein crucial to a binding relay for the import of proteins into mitochondria; subunit on the outer mouth of the TOM channel that accepts precursors from the receptors Tom20p and Tom22p Null mutant is viable but is temperature-sensitive and shows defects in import of mitochondrial preproteins; synthetically lethal with tom6, tom7, tom20, tom37, and tom70…
YJR094C	-	-	0.384507	IME1	Master regulator of meiosis that is active only during meiotic events, activates transcription of early meiotic genes through interaction with Ume6p, degraded by the 26S proteasome following phosphorylation by Ime2p The null mutant is viable. Diploids homozygous for the null mutation lack premeiotic DNA synthesis and do not sporulate; these phenotypes are recessive. YJR094C S000003854
YLR192C	-	-	0.384055	HCR1	Dual function protein involved in translation initiation as a substoichiometric component of eukaryotic translation initiation factor 3 (eIF3) and required for processing of 20S pre-rRNA; binds to eIF3 subunits Rpg1p and Prt1p and 18S rRNA YLR192C S000004182
YML100W	-	-	0.3833	TSL1	Large subunit of trehalose 6-phosphate synthase (Tps1p)/phosphatase (Tps2p) complex, which converts uridine-5'-diphosphoglucose and glucose 6-phosphate to trehalose, homologous to Tps3p and may share function YML100W S000004566
YLR060W	-	-	0.37871	FRS1	Beta subunit of cytoplasmic phenylalanyl-tRNA synthetase, forms a tetramer with Frs2p to generate active enzyme; sequence is evolutionarily distant from mitochondrial phenylalanyl-tRNA synthetase (Msf1p), but substrate binding is similar YLR060W S000004050
YKL085W	-	-	0.378405	MDH1	Mitochondrial malate dehydrogenase, catalyzes interconversion of malate and oxaloacetate; involved in the tricarboxylic acid (TCA) cycle; phosphorylated YKL085W S000001568
YOR394W	-	-	0.376927	PAU21	Hypothetical protein YOR394W S000005921
YDR406W	-	-	0.376011	PDR15	Plasma membrane ATP binding cassette (ABC) transporter, multidrug transporter and general stress response factor implicated in cellular detoxification; regulated by Pdr1p, Pdr3p and Pdr8p; promoter contains a PDR responsive element YDR406W S000002814
YJR089W	-	-	0.375726	BIR1	Essential chromosomal passenger protein involved in coordinating cell cycle events for proper chromosome segregation; C-terminal region binds Sli15p, and the middle region, upon phosphorylation, localizes Cbf2p to the spindle at anaphase YJR089W S000003849
YLR438W	-	-	0.375217	CAR2	cargB L-ornithine transaminase (OTAse), catalyzes the second step of arginine degradation, expression is dually-regulated by allophanate induction and a specific arginine induction process; not nitrogen catabolite repression sensitive Catabolism of arginine defective YLR438W S000004430
YOR385W	-	-	0.373824		NO_MATCH
YIR030C	-	-	0.370729	DCG1	Protein of unknown function, expression is sensitive to nitrogen catabolite repression and regulated by Dal80p; contains transmembrane domain YIR030C S000001469
YHR122W	-	-	0.369998		NO_MATCH
YHR174W	-	-	0.368849	ENO2	Enolase II, a phosphopyruvate hydratase that catalyzes the conversion of 2-phosphoglycerate to phosphoenolpyruvate during glycolysis and the reverse reaction during gluconeogenesis; expression is induced in response to glucose YHR174W S000001217
YJL212C	-	-	0.368779	OPT1	GSH11|HGT1 Proton-coupled oligopeptide transporter of the plasma membrane; also transports glutathione and phytochelatin; member of the OPT family Null mutant is viable, exhibits loss of plasma membrane glutathione transport YJL212C S000003748
YOL084W	-	-	0.36809	PHM7	Protein of unknown function, expression is regulated by phosphate levels; green fluorescent protein (GFP)-fusion protein localizes to the cell periphery and vacuole transcription is regulated by PHO system YOL084W S000005444
YDL212W	-	-	0.367588	SHR3	APF1 Endoplasmic reticulum packaging chaperone, required for incorporation of amino acid permeases into COPII coated vesicles for transport to the cell surface Null mutants are viable, specifically accumulate amino acid permeases in the endoplasmic reticulum YDL212W S000002371
YDR500C	-	-	0.367507	RPL37B	Protein component of the large (60S) ribosomal subunit, has similarity to Rpl37Ap and to rat L37 ribosomal protein YDR500C S000002908
YMR250W	-	-	0.367109	GAD1	Glutamate decarboxylase, converts glutamate into gamma-aminobutyric acid (GABA) during glutamate catabolism; involved in response to oxidative stress YMR250W S000004862
YNL100W	-	-	0.367059	AIM37	Putative protein of unknown function; non-tagged protein is detected in purified mitochondria; null mutant displays decreased frequency of mitochondrial genome loss (petite formation) and severe growth defect in minimal glycerol media YNL100W S000005044
YJR085C	-	-	0.366991		NO_MATCH
YLL031C	-	-	0.36504	GPI13	MPC1 ER membrane localized phosphoryltransferase that adds phosphoethanolamine onto the third mannose residue of the glycosylphosphatidylinositol (GPI) anchor precursor; similar to human PIG-O protein Null mutant is inviable; Gpi13p-depleted strains accumulate a GPI precursor whose glycan headgroup contains 4 mannoses and a phosphoethanolamine side-branch on the first mannose YLL031C S000003954
YDL070W	-	-	0.364284	BDF2	Protein involved in transcription initiation at TATA-containing promoters; associates with the basal transcription factor TFIID; contains two bromodomains; corresponds to the C-terminal region of mammalian TAF1; redundant with Bdf1p Null mutant is viable in FY1679, RAY3A-D, and CEN.PK2 backgrounds, and synthetic lethal with bdf1 YDL070W S000002228
YCL029C	-	-	0.364284	BIK1	ARM5|PAC14 Microtubule-associated protein, component of the interface between microtubules and kinetochore, involved in sister chromatid separation; essential in polyploid cells but not in haploid or diploid cells; ortholog of mammalian CLIP-170 Null mutant is viable, bik1 mutants exhibit bilateral defects in karyogamy YCL029C S000000534
YDR282C	-	-	0.364149		NO_MATCH
YJL014W	-	-	0.363584	CCT3	BIN2|TCP3 Subunit of the cytosolic chaperonin Cct ring complex, related to Tcp1p, required for the assembly of actin and tubulins in vivo Defects in microtubule and actin assembly in vivo, aberrant chromosome segregation, supersensitivity to benomyl YJL014W S000003551
YER182W	-	-	0.360101	FMP10	Putative protein of unknown function; the authentic, non-tagged protein is detected in highly purified mitochondria in high-throughput studies YER182W S000000984
YIL169C	-	-	0.359776		NO_MATCH
YLR430W	-	-	0.359702	SEN1	CIK3|NRD2 Presumed helicase required for RNA polymerase II transcription termination and processing of RNAs; homolog of Senataxin which causes Ataxia-Oculomotor Apraxia 2 and a dominant form of amyotrophic lateral sclerosis YLR430W S000004422
YLR061W	-	-	0.359618	RPL22A	Protein component of the large (60S) ribosomal subunit, has similarity to Rpl22Bp and to rat L22 ribosomal protein YLR061W S000004051
YKR009C	-	-	0.358829	FOX2	POX2 Multifunctional enzyme of the peroxisomal fatty acid beta-oxidation pathway; has 3-hydroxyacyl-CoA dehydrogenase and enoyl-CoA hydratase activities mutant lacks 2-enoyl-CoA hydratase and D-3-hydroxyacyl-CoA dehydrogenase activities YKR009C S000001717
YOR337W	-	-	0.358685	TEA1	Ty1 enhancer activator required for full levels of Ty enhancer-mediated transcription; C6 zinc cluster DNA-binding protein Diminished Ty1 expression YOR337W S000005864
YKR061W	-	-	0.358329	KTR2	Mannosyltransferase involved in N-linked protein glycosylation; member of the KRE2/MNT1 mannosyltransferase family Null mutant is viable, with partial resistance to killer toxin YKR061W S000001769
YOR285W	-	-	0.358103		NO_MATCH
YGR183C	-	-	0.357331	QCR9	UCR9 Subunit 9 of the ubiquinol cytochrome-c reductase complex, which is a component of the mitochondrial inner membrane electron transport chain; required for electron transfer at the ubiquinol oxidase site of the complex Null mutant is viable, is unable to grow on non-fermentable carbon sources YGR183C S000003415
YGR143W	-	-	0.356647	SKN1	Protein involved in sphingolipid biosynthesis; type II membrane protein with similarity to Kre6p Null mutant is viable; exhibits no alterations in killer sensitivity, growth, or (1->6)-beta-glucan levels; skn1 kre6 double deletion mutants show a dramatic reduction in both (1-->6)-beta-glucan levels and growth rate compared with either single disruptant YGR143W S000003375
YMR041C	-	-	0.356522	ARA2	NAD-dependent arabinose dehydrogenase, involved in biosynthesis of erythroascorbic acid; similar to plant L-galactose dehydrogenase YMR041C S000004644
YMR210W	-	-	0.35593		NO_MATCH
YER026C	-	-	0.355606	CHO1	PSS1 Phosphatidylserine synthase, functions in phospholipid biosynthesis; catalyzes the reaction CDP-diaclyglycerol + L-serine = CMP + L-1-phosphatidylserine, transcriptionally repressed by myo-inositol and choline The null mutant is viable but grows slowly on minimal medium. The growth rate of the null mutant on minimal medium can be increased by supplementing the medium with choline or other ph…
YGL028C	-	-	0.355305	SCW11	Cell wall protein with similarity to glucanases; may play a role in conjugation during mating based on its regulation by Ste12p Null mutant is viable but exhibits defects in separation after division and displays flocculant growth. YGL028C S000002996
YCR024C-A	-	-	0.35518	PMP1	Small single-membrane span proteolipid that functions as a regulatory subunit of the plasma membrane H(+)-ATPase Pma1p, forms unique helix and positively charged cytoplasmic domain that is able to specifically segregate phosphatidylserines Null mutant is viable; pmp1 pmp2 double mutant displays a lower Vmax for the plasma membrane H(+)-ATPase (Pma1p) YCR024C-A S000000619
YGR060W	-	-	0.353668	ERG25	C-4 methyl sterol oxidase, catalyzes the first of three steps required to remove two C-4 methyl groups from an intermediate in ergosterol biosynthesis; mutants accumulate the sterol intermediate 4,4-dimethylzymosterol YGR060W S000003292
YPR102C	-	-	0.353273	RPL11A	Protein component of the large (60S) ribosomal subunit, nearly identical to Rpl11Bp; involved in ribosomal assembly; depletion causes degradation of proteins and RNA of the 60S subunit; has similarity to E. coli L5 and rat L11 YPR102C S000006306
YNL331C	-	-	0.352753	AAD14	Putative aryl-alcohol dehydrogenase with similarity to P. chrysosporium aryl-alcohol dehydrogenase; mutational analysis has not yet revealed a physiological role YNL331C S000005275
YHL042W	-	-	0.352374		NO_MATCH
YNL094W	-	-	0.350951	APP1	Protein of unknown function, interacts with Rvs161p and Rvs167p; computational analysis of protein-protein interactions in large-scale studies suggests a possible role in actin filament organization Null: Viable. Other phenotypes: Unknown YNL094W S000005038
YJR143C	-	-	0.350468	PMT4	Protein O-mannosyltransferase, transfers mannose residues from dolichyl phosphate-D-mannose to protein serine/threonine residues; appears to form homodimers in vivo and does not complex with other Pmt proteins; target for new antifungals Null mutant is viable but shows under glycosylation of chitinase; pmt2 pmt3 pmt4 triple mutant is inviable YJR143C S000003904
YGR267C	-	-	0.349478	FOL2	GTP-cyclohydrolase I, catalyzes the first step in the folic acid biosynthetic pathway Folinic acid requiring YGR267C S000003499
YIL016W	-	-	0.348365	SNL1	Protein of unknown function proposed to be involved in nuclear pore complex biogenesis and maintenance as well as protein folding; has similarity to the mammalian BAG-1 protein Null mutant is viable; SNL1 is a high copy suppressor of nup116, gle2 and nic96 alleles YIL016W S000001278
YPR114W	-	-	0.348279		NO_MATCH
YHR019C	-	-	0.348265	DED81	Cytosolic asparaginyl-tRNA synthetase, required for protein synthesis, catalyzes the specific attachment of asparagine to its cognate tRNA YHR019C S000001061
YGR243W	-	-	0.347329	FMP43	Putative protein of unknown function; the authentic, non-tagged protein is detected in highly purified mitochondria in high-throughput studies YGR243W S000003475
YIL145C	-	-	0.343996	PAN6	Pantothenate synthase, also known as pantoate-beta-alanine ligase, required for pantothenic acid biosynthesis, deletion causes pantothenic acid auxotrophy, homologous to E. coli panC Null mutant is viable and shows pantothenate auxotrophy YIL145C S000001407
YDL007W	-	-	0.343403	RPT2	YHS4|YTA5 One of six ATPases of the 19S regulatory particle of the 26S proteasome involved in the degradation of ubiquitinated substrates; required for normal peptide hydrolysis by the core 20S particle YDL007W S000002165
YAL039C	-	-	0.343403	CYC3	Cytochrome c heme lyase (holocytochrome c synthase), attaches heme to apo-cytochrome c (Cyc1p or Cyc7p) in the mitochondrial intermembrane space; human ortholog may have a role in microphthalmia with linear skin defects (MLS) Cytochrome c deficiency YAL039C S000000037
YCR009C	-	-	0.340407	RVS161	END6|FUS7|SPE161 Amphiphysin-like lipid raft protein; subunit of a complex (Rvs161p-Rvs167p) that regulates polarization of the actin cytoskeleton, endocytosis, cell polarity, cell fusion and viability following starvation or osmotic stress Null mutant is viable, rvs161 mutations result in a delocalization of the actin cytoskeleton, high salt sensitivity, random budding pattern in diploid cells, …
YPL250C	-	-	0.338102	ICY2	Protein of unknown function; mobilized into polysomes upon a shift from a fermentable to nonfermentable carbon source; potential Cdc28p substrate YPL250C S000006171
YNL010W	-	-	0.337662		NO_MATCH
YJL108C	-	-	0.337477	PRM10	Pheromone-regulated protein, predicted to have 5 transmembrane segments; induced by treatment with 8-methoxypsoralen and UVA irradiation YJL108C S000003644
YMR193W	-	-	0.337013	MRPL24	MRPL14 Mitochondrial ribosomal protein of the large subunit YMR193W S000004806
YBL099W	-	-	0.334122	ATP1	Alpha subunit of the F1 sector of mitochondrial F1F0 ATP synthase, which is a large, evolutionarily conserved enzyme complex required for ATP synthesis; phosphorylated null mutant is viable; grows slowly on fermentable carbon sources; exhibits delayed kinetics of protein import for several mitochondrial precursors YBL099W S000000195
YDR309C	-	-	0.334122	GIC2	Redundant rho-like GTPase Cdc42p effector; homolog of Gic1p; involved in initiation of budding and cellular polarization; interacts with Cdc42p via the Cdc42/Rac-interactive binding (CRIB) domain and with PI(4,5)P2 via a polybasic region Null mutant is viable and temperature sensitive at 37 degrees C; gic1 gic2 double null is temperature sensitive at 33 degrees C YDR309C S000002717
YLR107W	-	-	0.333125	REX3	RNA exonuclease; required for maturation of the RNA component of RNase MRP; functions redundantly with Rnh70p and Rex2p in processing of U5 snRNA and RNase P RNA; member of RNase D family of exonucleases Mutants exhibit RNase MRP RNA processing defect; functions redundantly with REX1 and REX2 in U5 snRNA and RNase P RNA processing YLR107W S000004097
YER006W	-	-	0.332717	NUG1	GTPase that associates with nuclear 60S pre-ribosomes, required for export of 60S ribosomal subunits from the nucleus YER006W S000000808
YLR297W	-	-	0.331735		NO_MATCH
YNL311C	-	-	0.330862	SKP2	Protein of unknown function that may interact with ribosomes, based on co-purification experiments; putative F-box protein; analysis of integrated high-throughput datasets predicts involvement in ubiquitin-dependent protein catabolism YNL311C S000005255
YCR039C	-	-	0.329132	MATALPHA2	ALPHA2 Homeobox-domain protein that, with Mcm1p, represses a-specific genes in haploids; acts with A1p to repress transcription of haploid-specific genes in diploids; one of two genes encoded by the MATalpha mating type cassette YCR039C S000000635
YBR238C	-	-	0.327841		NO_MATCH
YBR189W	-	-	0.324885	RPS9B	RPS13A|SUP46 Protein component of the small (40S) ribosomal subunit; nearly identical to Rps9Ap and has similarity to E. coli S4 and rat S9 ribosomal proteins YBR189W S000000393
YGR042W	-	-	0.324707		NO_MATCH
YNL307C	-	-	0.323655	MCK1	YPK1 Protein serine/threonine/tyrosine (dual-specificity) kinase involved in control of chromosome segregation and in regulating entry into meiosis; related to mammalian glycogen synthase kinases of the GSK-3 family YNL307C S000005251
YOL100W	-	-	0.323006	PKH2	Serine/threonine protein kinase involved in sphingolipid-mediated signaling pathway that controls endocytosis; activates Ypk1p and Ykr2p, components of signaling cascade required for maintenance of cell wall integrity; redundant with Pkh1p Null mutant is viable; pkh1, pkh2 double mutant is lethal YOL100W S000005460
YOR066W	-	-	0.321673	MSA1	YOR29-17 Activator of G1-specific transcription factors, MBF and SBF, that regulates both the timing of G1-specific gene transcription, and cell cycle initiation; potential Cdc28p substrate YOR066W S000005592
YMR274C	-	-	0.321332	RCE1	Type II CAAX prenyl protease involved in the proteolysis and maturation of Ras and the a-factor mating pheromone Null mutant is viable, has defects in Ras localization and signaling, and suppresses the activated phenotype of the RAS2val19 allele YMR274C S000004887
YJR026W	-	-	0.321034		NO_MATCH
YPL004C	-	-	0.318966	LSP1	Primary component of eisosomes, which are large immobile patch structures at the cell cortex associated with endocytosis, along with Pil1p and Sur7p; null mutants show activation of Pkc1p/Ypk1p stress resistance pathways YPL004C S000005925
YIL020C	-	-	0.318908	HIS6	Phosphoribosyl-5-amino-1-phosphoribosyl-4-imidazolecarboxiamide isomerase, catalyzes the fourth step in histidine biosynthesis; mutations cause histidine auxotrophy and sensitivity to Cu, Co, and Ni salts Null mutant is viable and requires histidine YIL020C S000001282
YGR028W	-	-	0.318235	MSP1	YTA4 Mitochondrial protein involved in sorting of proteins in the mitochondria; putative membrane-spanning ATPase Null mutant is viable, exhibits no observable growth defects YGR028W S000003260
YLR287C-A	-	-	0.314338	RPS30A	Protein component of the small (40S) ribosomal subunit; nearly identical to Rps30Bp and has similarity to rat S30 ribosomal protein Null mutant is viable, exhibits a slow growth phenotype; ribosomes are normal YLR287C-A S000004278
YAL037W	-	-	0.313439		NO_MATCH
YLR172C	-	-	0.312293	DPH5	Methyltransferase required for synthesis of diphthamide, which is a modified histidine residue of translation elongation factor 2 (Eft1p or Eft2p); not essential for viability; GFP-Dph5p fusion protein localizes to the cytoplasm YLR172C S000004162
YJL225C	-	-	0.311632		NO_MATCH
YBR133C	-	-	0.311632	HSL7	Protein arginine N-methyltransferase that exhibits septin and Hsl1p-dependent bud neck localization and periodic Hsl1p-dependent phosphorylation; required along with Hsl1p for bud neck recruitment, phosphorylation, and degradation of Swe1p Null mutant is viable; synthetically lethal with histone H3 mutations; G2 delay YBR133C S000000337
YMR238W	-	-	0.308441	DFG5	Putative mannosidase, essential glycosylphosphatidylinositol (GPI)-anchored membrane protein required for cell wall biogenesis in bud formation, involved in filamentous growth, homologous to Dcw1p Null mutant is viable and defective in filamentous growth YMR238W S000004851
YGL026C	-	-	0.306697	TRP5	Tryptophan synthase involved in tryptophan biosynthesis, regulated by the general control system of amino acid biosynthesis Null mutant is viable and requires tryptophan YGL026C S000002994
YEL038W	-	-	0.306396	UTR4	Protein of unknown function with sequence similarity to 2,3-diketo-5-methylthiopentyl-1-phosphate enolase-phosphatases, found in both the cytoplasm and nucleus YEL038W S000000764
YJL109C	-	-	0.306396	UTP10	Nucleolar protein, component of the small subunit (SSU) processome containing the U3 snoRNA that is involved in processing of pre-18S rRNA YJL109C S000003645
YKR042W	-	-	0.305407	UTH1	Mitochondrial outer membrane and cell wall localized SUN family member required for mitochondrial autophagy; involved in the oxidative stress response, life span during starvation, mitochondrial biogenesis, and cell death extension of yeast lifespan YKR042W S000001750
YKR099W	-	-	0.305099	BAS1	Myb-related transcription factor involved in regulating basal and induced expression of genes of the purine and histidine biosynthesis pathways; also involved in regulation of meiotic recombination at specific genes YKR099W S000001807
YMR066W	-	-	0.30503	SOV1	Mitochondrial protein of unknown function YMR066W S000004670
YOR230W	-	-	0.30365	WTM1	Transcriptional modulator involved in regulation of meiosis, silencing, and expression of RNR genes; required for nuclear localization of the ribonucleotide reductase small subunit Rnr2p and Rnr4p; contains WD repeats YOR230W S000005756
YCR012W	-	-	0.303597	PGK1	3-phosphoglycerate kinase, catalyzes transfer of high-energy phosphoryl groups from the acyl phosphate of 1,3-bisphosphoglycerate to ADP to produce ATP; key enzyme in glycolysis and gluconeogenesis The null mutant is viable but unable to use glucose as a carbon source. YCR012W S000000605
YOR212W	-	-	0.302521	STE4	HMD2 G protein beta subunit, forms a dimer with Ste18p to activate the mating signaling pathway, forms a heterotrimer with Gpa1p and Ste18p to dampen signaling; may recruit Rho1p to the polarized growth site during mating; contains WD40 repeats YOR212W S000005738
YHR195W	-	-	0.301749	NVJ1	VAB36 Nuclear envelope protein that interacts with the vacuolar membrane protein Vac8p to promote formation of nucleus-vacuole junctions during piecemeal microautophagy of the nucleus (PMN) Null mutant is viable; cells do not form nucleus-vacuole junctions YHR195W S000001238
YBR291C	-	-	0.299325	CTP1	Mitochondrial inner membrane citrate transporter, member of the mitochondrial carrier family YBR291C S000000495
YKR066C	-	-	0.297766	CCP1	Mitochondrial cytochrome-c peroxidase; degrades reactive oxygen species in mitochondria, involved in the response to oxidative stress YKR066C S000001774
YDR014W	-	-	0.296176	RAD61	Protein of unknown function; mutation confers radiation sensitivity Null mutant is sensitive to ionizing radiation. Other phenotypes: Affects radiation sensitivity. YDR014W S000002421
YIL056W	-	-	0.295232	VHR1	Transcriptional activator, required for the vitamin H-responsive element (VHRE) mediated induction of VHT1 (Vitamin H transporter) and BIO5 (biotin biosynthesis intermediate transporter) in response to low biotin concentrations YIL056W S000001318
YER103W	-	-	0.294701	SSA4	YG107 Heat shock protein that is highly induced upon stress; plays a role in SRP-dependent cotranslational protein-membrane targeting and translocation; member of the HSP70 family; cytoplasmic protein that concentrates in nuclei upon starvation Null mutant is viable; ssa1 ssa2 ssa4 strains are inviable; an intact copy of SSA3 regulated by the constitutive SSA2 promoter is capable of rescuing the …
YML007W	-	-	0.293646	YAP1	PAR1|SNQ3 Basic leucine zipper (bZIP) transcription factor required for oxidative stress tolerance; activated by H2O2 through the multistep formation of disulfide bonds and transit from the cytoplasm to the nucleus; mediates resistance to cadmium YML007W S000004466
YJR144W	-	-	0.293382	MGM101	MGM9 Protein involved in mitochondrial genome maintenance; component of the mitochondrial nucleoid, required for the repair of oxidative mtDNA damage Null mutant is viable. Meiotic segregants with a disrupted mgm101 allele cannot undergo more than 10 divisions on glycerol medium. YJR144W S000003905
YPR158W	-	-	0.293021		NO_MATCH
YIL155C	-	-	0.292397	GUT2	Mitochondrial glycerol-3-phosphate dehydrogenase; expression is repressed by both glucose and cAMP and derepressed by non-fermentable carbon sources in a Snf1p, Rsf1p, Hap2/3/4/5 complex dependent manner Null mutant is viable, unable to utilize glycerol as a carbon source YIL155C S000001417
YPL049C	-	-	0.291925	DIG1	RST1 Regulatory protein of unknown function, constitutively-expressed, involved in the regulation of mating-specific genes and the invasive growth pathway, required for MAP-kinase imposed repression, inhibits pheromone-responsive transcription Null mutant is viable, shows abnormal bud morphology; dig1 dig2 double mutants show constitutive mating defect and invasive growth; overexpression causes p…
YGR198W	-	-	0.29099	YPP1	Cargo-transport protein involved in endocytosis; may interact with ribosomes, based on co-purification experiments; GFP-fusion protein localizes to the cytoplasm; YGR198W is an essential gene YGR198W S000003430
YLR150W	-	-	0.290962	STM1	MPT4 Protein that binds G4 quadruplex and purine motif triplex nucleic acid; acts with Cdc13p to maintain telomere structure; interacts with ribosomes and subtelomeric Y' DNA; multicopy suppressor of tom1 and pop2 mutations Null mutant is viable; overexpression of STM1 suppresses some phenotypes of pop2 null mutations and the temperature sensitivity of tom1 and htr1 mutants. Cells lacking Stm1 di…
YLR456W	-	-	0.289157		NO_MATCH
YBR183W	-	-	0.289097	YPC1	Alkaline ceramidase that also has reverse (CoA-independent) ceramide synthase activity, catalyzes both breakdown and synthesis of phytoceramide; overexpression confers fumonisin B1 resistance Null mutant is viable and two times more heat resistant than the wild-type parental strain. YBR183W S000000387
YJL048C	-	-	0.288592	UBX6	CUI2 UBX (ubiquitin regulatory X) domain-containing protein that interacts with Cdc48p, transcription is repressed when cells are grown in media containing inositol and choline YJL048C S000003584
YJR110W	-	-	0.2882	YMR1	Phosphatidylinositol 3-phosphate [PI(3)P] phosphatase, regulates the localization and levels of PI(3)P; involved in cytoplasm to vacuole (CVT) transport; has similarity to the conserved myotubularin dual specificity phosphatase family YJR110W S000003871
YBR120C	-	-	0.287902	CBP6	Mitochondrial translational activator of the COB mRNA; phosphorylated Null mutant is viable, repiratory deficiency with concomitant loss of cytochrome b YBR120C S000000324
YHR050W	-	-	0.287842	SMF2	Divalent metal ion transporter involved in manganese homeostasis; has broad specificity for di-valent and tri-valent metals; post-translationally regulated by levels of metal ions; member of the Nramp family of metal transport proteins Null mutant is viable, shows double mutant sickness with smf1 null YHR050W S000001092
YNL270C	-	-	0.287129	ALP1	APL1 Arginine transporter; expression is normally very low and it is unclear what conditions would induce significant expression YNL270C S000005214
YGL120C	-	-	0.285608	PRP43	JA1 RNA helicase in the DEAH-box family, functions in both RNA polymerase I and polymerase II transcript metabolism, involved in release of the lariat-intron from the spliceosome YGL120C S000003088
YBR031W	-	-	0.284759	RPL4A	N-terminally acetylated protein component of the large (60S) ribosomal subunit, nearly identical to Rpl4Bp and has similarity to E. coli L4 and rat L4 ribosomal proteins YBR031W S000000235
YBR168W	-	-	0.282738	PEX32	Peroxisomal integral membrane protein, involved in negative regulation of peroxisome size; partially functionally redundant with Pex31p; genetic interactions suggest action at a step downstream of steps mediated by Pex28p and Pex29p YBR168W S000000372
YIL158W	-	-	0.282642	AIM20	Putative protein of unknown function; green fluorescent protein (GFP)-fusion protein localizes to the vacuole; null mutant displays increased frequency of mitochondrial genome loss (petite formation) YIL158W S000001420
YGR145W	-	-	0.281961	ENP2	Essential nucleolar protein of unknown function; contains WD repeats, interacts with Mpp10p and Bfr2p, and has homology to Spb1p YGR145W S000003377
YMR290C	-	-	0.280306	HAS1	ATP-dependent RNA helicase; localizes to both the nuclear periphery and nucleolus; highly enriched in nuclear pore complex fractions; constituent of 66S pre-ribosomal particles YMR290C S000004903
YDR144C	-	-	0.280174	MKC7	YPS2 GPI-anchored aspartyl protease (yapsin) involved in protein processing; shares functions with Yap3p and Kex2p Null mutant is viable, mkc7 yap3 double mutants are temperature sensitive, and mkc7 yap3 kex2 triple mutants are temperaturea nd cold-sensitive YDR144C S000002551
YOL118C	-	-	0.279683		NO_MATCH
YPR079W	-	-	0.278615	MRL1	Membrane protein with similarity to mammalian mannose-6-phosphate receptors, possibly functions as a sorting receptor in the delivery of vacuolar hydrolases YPR079W S000006283
YDR465C	-	-	0.278233	RMT2	Arginine methyltransferase; ribosomal protein L12 is a substrate YDR465C S000002873
YHR121W	-	-	0.27716	LSM12	Protein of unknown function that may function in RNA processing; interacts with Pbp1p and Pbp4p and associates with ribosomes; contains an RNA-binding LSM domain and an AD domain; GFP-fusion protein is induced by the DNA-damaging agent MMS YHR121W S000001163
YPR058W	-	-	0.275319	YMC1	Mitochondrial protein, putative inner membrane transporter with a role in oleate metabolism and glutamate biosynthesis; member of the mitochondrial carrier (MCF) family; has similarity with Ymc2p YPR058W S000006262
YNL030W	-	-	0.275138	HHF2	One of two identical histone H4 proteins (see also HHF1); core histone required for chromatin assembly and chromosome function; contributes to telomeric silencing; N-terminal domain involved in maintaining genomic integrity YNL030W S000004975
YCL043C	-	-	0.274839	PDI1	MFP1|TRG1 Protein disulfide isomerase, multifunctional protein resident in the endoplasmic reticulum lumen, essential for the formation of disulfide bonds in secretory and cell-surface proteins, unscrambles non-native disulfide bonds YCL043C S000000548
YEL075C	-	-	0.274193		NO_MATCH
YOR203W	-	-	0.273295		NO_MATCH
YKR003W	-	-	0.273013	OSH6	Member of an oxysterol-binding protein family with overlapping, redundant functions in sterol metabolism and which collectively perform a function essential for viability; GFP-fusion protein localizes to the cell periphery YKR003W S000001711
YNR028W	-	-	0.271838	CPR8	Peptidyl-prolyl cis-trans isomerase (cyclophilin), catalyzes the cis-trans isomerization of peptide bonds N-terminal to proline residues; similarity to Cpr4p suggests a potential role in the secretory pathway YNR028W S000005311
YGR189C	-	-	0.270376	CRH1	Putative chitin transglycosidase, cell wall protein that functions in the transfer of chitin to beta(1-6)glucan; localizes to sites of polarized growth; expression is induced under cell wall stress conditions Null mutant is viable and hypersensitive to Congo Red and Calcofluor White YGR189C S000003421
YGR025W	-	-	0.26889		NO_MATCH
YOL162W	-	-	0.267198		NO_MATCH
YOR052C	-	-	0.26704		NO_MATCH
YIL052C	-	-	0.265084	RPL34B	Protein component of the large (60S) ribosomal subunit, nearly identical to Rpl34Ap and has similarity to rat L34 ribosomal protein YIL052C S000001314
YMR097C	-	-	0.264861	MTG1	Peripheral GTPase of the mitochondrial inner membrane, essential for respiratory competence, likely functions in assembly of the large ribosomal subunit, has homologs in plants and animals YMR097C S000004703
YCL042W	-	-	0.264604		NO_MATCH
YHL004W	-	-	0.26448	MRP4	Mitochondrial ribosomal protein of the small subunit YHL004W S000000996
YHL048W	-	-	0.263399	COS8	Nuclear membrane protein, member of the DUP380 subfamily of conserved, often subtelomerically-encoded proteins; regulation suggests a potential role in the unfolded protein response YHL048W S000001040
YAL012W	-	-	0.258607	CYS3	CYI1|FUN35|STR1 Cystathionine gamma-lyase, catalyzes one of the two reactions involved in the transsulfuration pathway that yields cysteine from homocysteine with the intermediary formation of cystathionine Null mutant is viable, cysteine auxotroph YAL012W S000000010
YPL269W	-	-	0.258043	KAR9	Karyogamy protein required for correct positioning of the mitotic spindle and for orienting cytoplasmic microtubules, localizes at the shmoo tip in mating cells and at the tip of the growing bud in small-budded cells through anaphase Null mutant is viable; cytoplasmic microtubule orientation defects, nuclear migration defects, benomyl sensitive YPL269W S000006190
YPR119W	-	-	0.25748	CLB2	B-type cyclin involved in cell cycle progression; activates Cdc28p to promote the transition from G2 to M phase; accumulates during G2 and M, then targeted via a destruction box motif for ubiquitin-mediated degradation by the proteasome YPR119W S000006323
YGL209W	-	-	0.25748	MIG2	MLZ1 Protein containing zinc fingers, involved in repression, along with Mig1p, of SUC2 (invertase) expression by high levels of glucose; binds to Mig1p-binding sites in SUC2 promoter Null mutant is viable; a strain that contains a double disruption of MIG1 and MIG2 is defective in glucose repression of SUC2 expression YGL209W S000003177
YHR025W	-	-	0.256358	THR1	Homoserine kinase, conserved protein required for threonine biosynthesis; expression is regulated by the GCN4-mediated general amino acid control pathway Null mutant is viable, threonine auxotroph YHR025W S000001067
YGR014W	-	-	0.255239	MSB2	Mucin family member involved in the Cdc42p- and MAP kinase-dependent filamentous growth signaling pathway; also functions as an osmosensor in parallel to the Sho1p-mediated pathway; potential Cdc28p substrate multicopy suppressor of cdc24 ts mutation YGR014W S000003246
YHR207C	-	-	0.255056	SET5	Zinc-finger protein of unknown function, contains one canonical and two unusual fingers in unusual arrangements; deletion enhances replication of positive-strand RNA virus YHR207C S000001250
YHR170W	-	-	0.251352	NMD3	SRC5 Protein involved in nuclear export of the large ribosomal subunit; acts as a Crm1p-dependent adapter protein for export of nascent ribosomal subunits through the nuclear pore complex Null mutant is inviable, at nonpermissive temperature, nmd3 ts mutants exhibit decreased levels of 60S subunits resulting in formation of half-mer polysomes; nmd3 xrn1(kem1) double mutants are inviable YHR170W S…
YNL031C	-	-	0.2508	HHT2	One of two identical histone H3 proteins (see also HHT1); core histone required for chromatin assembly, involved in heterochromatin-mediated telomeric and HM silencing; regulated by acetylation, methylation, and mitotic phosphorylation YNL031C S000004976
YIL015C-A	-	-	0.250194		NO_MATCH
YNR038W	-	-	0.249151	DBP6	Essential protein involved in ribosome biogenesis; putative ATP-dependent RNA helicase of the DEAD-box protein family Null mutant is inviable; Dbp6p depletion leads to decreased production of the 27S and 7S precursors, resulting in a depletion of the mature 25S and 5.8S rRNAs YNR038W S000005321
YNL072W	-	-	0.248603	RNH201	RNH35 Ribonuclease H2 catalytic subunit, removes RNA primers during Okazaki fragment synthesis; cooperates with Rad27p nuclease Null mutant is viable but shows 75% reduction of RNase H activity in cell extracts YNL072W S000005016
YHR214W	-	-	0.247129		NO_MATCH
YMR205C	-	-	0.246875	PFK2	Beta subunit of heterooctameric phosphofructokinase involved in glycolysis, indispensable for anaerobic growth, activated by fructose-2,6-bisphosphate and AMP, mutation inhibits glucose induction of cell cycle-related genes Null mutant is viable but exhibits slow growth and decreased efficiency of glucose utilization. YMR205C S000004818
YDL183C	-	-	0.245522		NO_MATCH
YLR455W	-	-	0.245333		NO_MATCH
YLR042C	-	-	0.245333		NO_MATCH
YCR013C	-	-	0.244123		NO_MATCH
YNL124W	-	-	0.243593	NAF1	Protein required for the assembly of box H/ACA snoRNPs and for pre-rRNA processing, forms a complex with Shq1p and interacts with H/ACA snoRNP components Nhp2p and Cbf5p; has similarity to Gar1p and other RNA-binding proteins Null: inviable. Other phenotypes: Depletion leads to loss of independently transcribed box H/ACA snoRNAs YNL124W S000005068
YDR230W	-	-	0.243343		NO_MATCH
YNL024C	-	-	0.242355		NO_MATCH
YDR244W	-	-	0.240975	PEX5	PAS10 Peroxisomal membrane signal receptor for the C-terminal tripeptide signal sequence (PTS1) of peroxisomal matrix proteins, required for peroxisomal matrix protein import; also proposed to have PTS1-receptor independent functions Null mutant is viable but accumulates peroxisomal, leaflet-like membrane structures and exhibits deficient import of some peroxisomal matrix enzymes, particularly pr…
YGR231C	-	-	0.240488	PHB2	Subunit of the prohibitin complex (Phb1p-Phb2p), a 1.2 MDa ring-shaped inner mitochondrial membrane chaperone that stabilizes newly synthesized proteins; determinant of replicative life span; involved in mitochondrial segregation YGR231C S000003463
YMR031C	-	-	0.239954		NO_MATCH
YLR348C	-	-	0.237826	DIC1	Mitochondrial dicarboxylate carrier, integral membrane protein, catalyzes a dicarboxylate-phosphate exchange across the inner mitochondrial membrane, transports cytoplasmic dicarboxylates into the mitochondrial matrix YLR348C S000004340
YDL004W	-	-	0.237826	ATP16	Delta subunit of the central stalk of mitochondrial F1F0 ATP synthase, which is a large, evolutionarily conserved enzyme complex required for ATP synthesis; phosphorylated cells are entirely cytoplasmic petite YDL004W S000002162
YNL207W	-	-	0.237297	RIO2	Essential serine kinase involved in the processing of the 20S pre-rRNA into mature 18S rRNA; has similarity to Rio1p YNL207W S000005151
YDL248W	-	-	0.236863	COS7	Protein of unknown function, member of the DUP380 subfamily of conserved, often subtelomerically-encoded proteins; the authentic, non-tagged protein is detected in highly purified mitochondria in high-throughput studies YDL248W S000002407
YPL055C	-	-	0.236031	LGE1	Protein of unknown function; null mutant forms abnormally large cells, and homozygous diploid null mutant displays delayed premeiotic DNA synthesis and reduced efficiency of meiotic nuclear division Null: large cell size. Other phenotypes: synthetic lethal with swi4 YPL055C S000005976
YOR340C	-	-	0.235712	RPA43	RNA polymerase I subunit A43 YOR340C S000005867
YBR211C	-	-	0.235712	AME1	ARP100 Essential kinetochore protein associated with microtubules and spindle pole bodies; component of the kinetochore sub-complex COMA (Ctf19p, Okp1p, Mcm21p, Ame1p); involved in spindle checkpoint maintenance Null: Null mutant is inviable; localizes to microtubules and SPB region, ame1-1 arrests in G2/M, mutant rescues benomyl sensitivity of TUB4/ tub4 heterozygote, ame1-4 mutant allele and he…
YER083C	-	-	0.235168	GET2	HUR2|RMD7 Subunit of the GET complex; required for meiotic nuclear division and for the retrieval of HDEL proteins from the Golgi to the ER in an ERD2 dependent fashion; may be involved in cell wall function null is hypersensitive to calcofluor white suffer an increased spheroplast lysis rate YER083C S000000885
YJR036C	-	-	0.235141	HUL4	Protein with similarity to hect domain E3 ubiquitin-protein ligases, not essential for viability YJR036C S000003797
YDR357C	-	-	0.234931		NO_MATCH
YOR196C	-	-	0.234749	LIP5	Protein involved in biosynthesis of the coenzyme lipoic acid, has similarity to E. coli lipoic acid synthase Null mutant is viable; cannot synthesize lipoic acid; grows slowly on ethanol-rich media; barely grows on glyerol-rich media; undergoes a high frequency of mitochondrial DNA deletions YOR196C S000005722
YKL046C	-	-	0.23466	DCW1	Putative mannosidase, GPI-anchored membrane protein required for cell wall biosynthesis in bud formation;homologous to Dfg5p YKL046C S000001529
YDL047W	-	-	0.23466	SIT4	LGN4 Type 2A-related serine-threonine phosphatase that functions in the G1/S transition of the mitotic cycle; cytoplasmic and nuclear protein that modulates functions mediated by Pkc1p including cell wall and actin cytoskeleton organization sit1-sit4 or sit2-sit4 double mutants are lethal YDL047W S000002205
YLR328W	-	-	0.234304	NMA1	Nicotinic acid mononucleotide adenylyltransferase, involved in pathways of NAD biosynthesis, including the de novo, NAD(+) salvage, and nicotinamide riboside salvage pathways Null: viable. Other phenotypes: 2 or more copies increase rDNA and telomeric silencing YLR328W S000004320
YJL154C	-	-	0.234135	VPS35	GRD9|VPT7 Endosomal subunit of membrane-associated retromer complex required for retrograde transport; receptor that recognizes retrieval signals on cargo proteins, forms subcomplex with Vps26p and Vps29p that selects cargo proteins for retrieval Null mutant is viable, exhibits defects in sorting of vacuolar carboxypeptidase Y, proteinase A, proteinase B, and alkaline phosphatase YJL154C S0000036…
YOR292C	-	-	0.234084		NO_MATCH
YGL001C	-	-	0.233997	ERG26	C-3 sterol dehydrogenase, catalyzes the second of three steps required to remove two C-4 methyl groups from an intermediate in ergosterol biosynthesis YGL001C S000002969
YKL094W	-	-	0.231272	YJU3	Serine hydrolase with sequence similarity to monoglyceride lipase (MGL), localizes to lipid particles YKL094W S000001577
YER087C-A	-	-	0.231224		NO_MATCH
YJL088W	-	-	0.231173	ARG3	Ornithine carbamoyltransferase (carbamoylphosphate:L-ornithine carbamoyltransferase), catalyzes the sixth step in the biosynthesis of the arginine precursor ornithine Arginine requiring YJL088W S000003624
YMR158W	-	-	0.230473	MRPS8	Mitochondrial ribosomal protein of the small subunit YMR158W S000004767
YDL091C	-	-	0.229966	UBX3	UBX (ubiquitin regulatory X) domain-containing protein that interacts with Cdc48p, green fluorescent protein (GFP)-fusion protein localizes to the cytoplasm in a punctate pattern YDL091C S000002249
YDR532C	-	-	0.229217		NO_MATCH
YDR100W	-	-	0.228772	TVP15	Integral membrane protein localized to late Golgi vesicles along with the v-SNARE Tlg2p Null: no notable phenotype YDR100W S000002507
YLR333C	-	-	0.228689	RPS25B	Protein component of the small (40S) ribosomal subunit; nearly identical to Rps25Ap and has similarity to rat S25 ribosomal protein YLR333C S000004325
YER016W	-	-	0.227763	BIM1	EB1|YEB1 Microtubule-binding protein that together with Kar9p makes up the cortical microtubule capture site and delays the exit from mitosis when the spindle is oriented abnormally Null mutant is viable, causes cold sensitivity, benomyl supersensitivity, aberrant microtubule morphology. During mitosis in bim1 mutants, the nucleus fails to move to the mother-bud neck. YER016W S000000818
YCRX01W	-	-	0.227387		NO_MATCH
YHR054C	-	-	0.226648		NO_MATCH
YJR065C	-	-	0.225761	ARP3	ACT4 Essential component of the Arp2/3 complex, which is a highly conserved actin nucleation center required for the motility and integrity of actin patches; involved in endocytosis and membrane growth and polarity Mutations in Arp3 lead to defects in actin-patch motility and a rearrangement of the cortical actin cytoskeleton. YJR065C S000003826
YGL202W	-	-	0.225087	ARO8	Aromatic aminotransferase I, expression is regulated by general control of amino acid biosynthesis YGL202W S000003170
YOL047C	-	-	0.223675		NO_MATCH
YDR113C	-	-	0.223301	PDS1	Securin that inhibits anaphase by binding separin Esp1p, also blocks cyclin destruction and mitotic exit, essential for cell cycle arrest in mitosis in the presence of DNA damage or aberrant mitotic spindles; also present in meiotic nuclei Null mutant is viable but is temperature-sensitive; shows higher rates of chromosome loss at permissive temperature; at restrictive temperature, fails to elong…
YHR183W	-	-	0.221259	GND1	6-phosphogluconate dehydrogenase (decarboxylating), catalyzes an NADPH regenerating reaction in the pentose phosphate pathway; required for growth on D-glucono-delta-lactone and adaptation to oxidative stress YHR183W S000001226
YMR241W	-	-	0.220733	YHM2	Mitochondrial DNA-binding protein, component of the mitochondrial nucleoid structure, involved in mtDNA replication and segregation of mitochondrial genomes; member of the mitochondrial carrier protein family Null mutant is viable but shows slow growth in the presence of non-fermentable carbon sources; mutant shows mitochondrial genome unstability YMR241W S000004854
YBR129C	-	-	0.220269	OPY1	Protein of unknown function, overproduction blocks cell cycle arrest in the presence of mating pheromone; the authentic, non-tagged protein is detected in highly purified mitochondria in high-throughput studies YBR129C S000000333
YML048W	-	-	0.219901	GSF2	ECM6 ER localized integral membrane protein that may promote secretion of certain hexose transporters, including Gal2p; involved in glucose-dependent repression A Tn3 insertion into this gene causes hypersensitivity to the cell surface polymer perturbing agent calcofluor white; Defective in glucose repression; mutants decrease transcriptional repression by MIG1; alter glucose-regulated subunit in…
YOL083W	-	-	0.219389		NO_MATCH
YJL079C	-	-	0.218777	PRY1	Protein of unknown function, has similarity to Pry2p and Pry3p and to the plant PR-1 class of pathogen related proteins YJL079C S000003615
YER062C	-	-	0.215855	HOR2	GPP2 One of two redundant DL-glycerol-3-phosphatases (RHR2/GPP1 encodes the other) involved in glycerol biosynthesis; induced in response to hyperosmotic stress and oxidative stress, and during the diauxic transition Mutants lacking both RHR2 and HOR2 are devoid of glycerol 3-phosphatase activity and produce only a small amount of glycerol. Overproduction of both genes does not significantly enha…
YJL213W	-	-	0.215823		NO_MATCH
YPL211W	-	-	0.215276	NIP7	Nucleolar protein required for 60S ribosome subunit biogenesis, constituent of 66S pre-ribosomal particles; physically interacts with Nop8p and the exosome subunit Rrp43p Null mutant is inviable; in the temperature-sensitive mutant nip7-1, glycine 71 is replaced by aspartic acid YPL211W S000006132
YOR334W	-	-	0.215245	MRS2	Mitochondrial inner membrane Mg(2+) channel, required for maintenance of intramitochondrial Mg(2+) concentrations at the correct level to support splicing of group II introns Null mutant is viable; has a pet- phenotype, associated with a block in mitochondrial RNA splicing of all mitochondrial group II introns YOR334W S000005861
YPR098C	-	-	0.215103		NO_MATCH
YDR089W	-	-	0.214287		NO_MATCH
YBR181C	-	-	0.214254	RPS6B	LPG18|RPS101|RPS102 Protein component of the small (40S) ribosomal subunit; identical to Rps6Ap and has similarity to rat S6 ribosomal protein YBR181C S000000385
YKR048C	-	-	0.213091	NAP1	Protein that interacts with mitotic cyclin Clb2p; required for the regulation of microtubule dynamics during mitosis; controls bud morphogenesis; involved in the transport of H2A and H2B histones to the nucleus; phosphorylated by CK2 Null mutant is viable but exhibits defects in Clb2 function. YKR048C S000001756
YBR010W	-	-	0.212808	HHT1	BUR5|SIN2 One of two identical histone H3 proteins (see also HHT2); core histone required for chromatin assembly, involved in heterochromatin-mediated telomeric and HM silencing; regulated by acetylation, methylation, and mitotic phosphorylation YBR010W S000000214
YLL023C	-	-	0.212352		NO_MATCH
YBL002W	-	-	0.212321	HTB2	One of two nearly identical (see HTB1) histone H2B subtypes required for chromatin assembly and chromosome function; Rad6p-Bre1p-Lge1p mediated ubiquitination regulates transcriptional activation, meiotic DSB formation and H3 methylation Null mutant is viable. Deletion of the HTA2-HTB2 (TRT2) locus has no reported observable phenotypes, presumably because HTA1-HTB1 (TRT1) expression is upregulate…
NORF20	-	-	0.209722		NO_MATCH
YLR315W	-	-	0.209497	NKP2	Non-essential kinetochore protein, subunit of the Ctf19 central kinetochore complex (Ctf19p-Mcm21p-Okp1p-Mcm22p-Mcm16p-Ctf3p-Chl4p-Mcm19p-Nkp1p-Nkp2p-Ame1p-Mtw1p) YLR315W S000004307
YJL063C	-	-	0.209376	MRPL8	HRD238 Mitochondrial ribosomal protein of the large subunit Null mutant is viable; shows loss of mitochondrial function, instability of mitochondrial DNA YJL063C S000003599
YJR062C	-	-	0.207106	NTA1	DEA1 Amidase, removes the amide group from N-terminal asparagine and glutamine residues to generate proteins with N-terminal aspartate and glutamate residues that are targets of ubiquitin-mediated degradation Null mutant is viable but cannot degrade N-end rule substrates that have N-terminal asparagine or glutamine YJR062C S000003823
YMR304C-A	-	-	0.206474		NO_MATCH
YPL221W	-	-	0.205406	FLC1	BOP1|HUF1 Putative FAD transporter; required for uptake of FAD into endoplasmic reticulum; involved in cell wall maintenance YPL221W S000006142
YIR034C	-	-	0.205197	LYS1	Saccharopine dehydrogenase (NAD+, L-lysine-forming), catalyzes the conversion of saccharopine to L-lysine, which is the final step in the lysine biosynthesis pathway Lysine requiring YIR034C S000001473
YFL062W	-	-	0.204504	COS4	Protein of unknown function, member of the DUP380 subfamily of conserved, often subtelomerically-encoded proteins YFL062W S000001832
YOR084W	-	-	0.203114	LPX1	Oleic acid-inducible, peroxisomal matrix localized lipase; transcriptionally activated by Yrm1p along with genes involved in multidrug resistance; peroxisomal import is dependent on the PTS1 receptor, Pex5p and on self-interaction YOR084W S000005610
YIL153W	-	-	0.202637	RRD1	YPA1 Activator of the phosphotyrosyl phosphatase activity of PP2A, peptidyl-prolyl cis/trans-isomerase; regulates G1 phase progression, microtubule dynamics, bud morphogenesis and DNA repair; subunit of the Tap42p-Sit4p-Rrd1p complex Null mutant shows pleiotropic phenotypes (eg. caffeine and rapamycin resistance, vanadate and calcium sensitivity, etc.); synthetic lethal with RRD2; lethality of rr…
YDR443C	-	-	0.201859	SSN2	MED13|NUT8|RYE3|SCA1|SRB9|UME2 Subunit of the RNA polymerase II mediator complex; associates with core polymerase subunits to form the RNA polymerase II holoenzyme; required for stable association of Srb10p-Srb11p kinase; essential for transcriptional regulation Null mutant is viable; ssn2 mutations can suppress CTD truncations or phosphorylation mutants and snf1 mutations YDR443C S000002851
YBR088C	-	-	0.20103	POL30	Proliferating cell nuclear antigen (PCNA), functions as the sliding clamp for DNA polymerase delta; may function as a docking site for other proteins required for mitotic and meiotic chromosomal DNA replication and for DNA repair YBR088C S000000292
YDR283C	-	-	0.196962	GCN2	AAS1 Protein kinase, phosphorylates the alpha-subunit of translation initiation factor eIF2 (Sui2p) in response to starvation; activated by uncharged tRNAs and the Gcn1p-Gcn20p complex Null mutant is viable, unable to grow on medium containing 3-aminotriazole (3-AT), a competitive inhibitor of histidine biosynthesis, because it cannot derepress GCN4 and its target genes in the histidine biosynthe…
YNR035C	-	-	0.196135	ARC35	END9 Subunit of the ARP2/3 complex, which is required for the motility and integrity of cortical actin patches; required for cortical localization of calmodulin Null mutant exhibits severe growth defects; synthetic lethal with vma2. YNR035C S000005318
YPL086C	-	-	0.195013	ELP3	HPA1|TOT3 Subunit of Elongator complex, which is required for modification of wobble nucleosides in tRNA; exhibits histone acetyltransferase activity that is directed to histones H3 and H4; disruption confers resistance to K. lactis zymotoxin YPL086C S000006007
YMR095C	-	-	0.194694	SNO1	Protein of unconfirmed function, involved in pyridoxine metabolism; expression is induced during stationary phase; forms a putative glutamine amidotransferase complex with Snz1p, with Sno1p serving as the glutaminase Null mutant is viable, sensitive to 6-azauracil and methylene blue. YMR095C S000004701
YGR021W	-	-	0.191538		NO_MATCH
YGR159C	-	-	0.189545	NSR1	SHE5 Nucleolar protein that binds nuclear localization sequences, required for pre-rRNA processing and ribosome biogenesis Null mutant is viable, shows severe growth defect. YGR159C S000003391
YDL084W	-	-	0.189545	SUB2	Component of the TREX complex required for nuclear mRNA export; member of the DEAD-box RNA helicase superfamily and is involved in early and late steps of spliceosome assembly; homolog of the human splicing factor hUAP56 Null mutant is inviable; sub2 allele suppresses cold-sensitive snRNP phenotype of brr1-1 YDL084W S000002242
YDL032W	-	-	0.189545		NO_MATCH
YNR022C	-	-	0.189055	MRPL50	Mitochondrial ribosomal protein of the large subunit, not essential for mitochondrial translation YNR022C S000005305
YDL014W	-	-	0.187716	NOP1	LOT3 Nucleolar protein, component of the small subunit processome complex, which is required for processing of pre-18S rRNA; has similarity to mammalian fibrillarin Null mutant is inviable. Temperature-sensitive alleles exhibit various defects in rRNA processing.| YDL014W S000002172
YJL034W	-	-	0.185445	KAR2	GRP78 ATPase involved in protein import into the ER, also acts as a chaperone to mediate protein folding in the ER and may play a role in ER export of soluble proteins; regulates the unfolded protein response via interaction with Ire1p null mutants are inviable; other mutants block karyogamy (nuclear fusion) during mating YJL034W S000003571
YPR200C	-	-	0.185135	ARR2	ACR2 Arsenate reductase required for arsenate resistance; converts arsenate to arsenite which can then be exported from cells by Arr3p Null mutant is viable but sensitive to arsenate (but not arsenite). YPR200C S000006404
YKL035W	-	-	0.184056	UGP1	UDP-glucose pyrophosphorylase (UGPase), catalyses the reversible formation of UDP-Glc from glucose 1-phosphate and UTP, involved in a wide variety of metabolic pathways, expression modulated by Pho85p through Pho4p Null mutant is inviable, probably due to inability to properly form the cell wall YKL035W S000001518
YLR400W	-	-	0.178723		NO_MATCH
YMR096W	-	-	0.178289	SNZ1	Protein involved in vitamin B6 biosynthesis; member of a stationary phase-induced gene family; coregulated with SNO1; interacts with Sno1p and with Yhr198p, perhaps as a multiprotein complex containing other Snz and Sno proteins Null mutant is viable, sensitive to 6-azauracil and methylene blue. YMR096W S000004702
YKR026C	-	-	0.17793	GCN3	AAS2 Alpha subunit of the translation initiation factor eIF2B, the guanine-nucleotide exchange factor for eIF2; activity subsequently regulated by phosphorylated eIF2; first identified as a positive regulator of GCN4 expression null mutants fail to derepress amino acid-regulated genes under conditions of amino acid starvation YKR026C S000001734
YLR342W	-	-	0.177837	FKS1	CND1|CWH53|ETG1|GSC1|PBR1 Catalytic subunit of 1,3-beta-D-glucan synthase, functionally redundant with alternate catalytic subunit Gsc2p; binds to regulatory subunit Rho1p; involved in cell wall synthesis and maintenance; localizes to sites of cell wall remodeling Null mutant is viable, demonstrates slow growth, hypersensitivity to FK506 and cyclosporin A, sensitivity to echinocandin and a reduct…
YJR046W	-	-	0.176814	TAH11	CDT1|SID2 DNA replication licensing factor, required for pre-replication complex assembly Mutants lose minichromosomes in ARS number-dependent manner. tah11-1 mutant hypersensitive to hydroxyurea, camptothecin when overexpressing wild-type TOP1. Cells partially depleted of TAH11 replicate DNA from fewer origins; fully-depleted cells fail to load Mcm2 on chromatin, fail to initiate but not elongat…
YPL106C	-	-	0.176559	SSE1	LPG3|MSI3 ATPase that is a component of the heat shock protein Hsp90 chaperone complex; binds unfolded proteins; member of the heat shock protein 70 (HSP70) family; localized to the cytoplasm Null mutant is viable, slow growing, shows no additive effects with sse2 null mutation; temperature sensitive in some strain backgrounds YPL106C S000006027
YJL104W	-	-	0.176073	PAM16	MIA1|TIM16 Constituent of the mitochondrial import motor associated with the presequence translocase, along with Ssc1p, Tim44p, Mge1p, and Pam18p; forms a 1:1 subcomplex with Pam18p and inhibits its cochaperone activity; contains J-like domain Null mutant is inviable; MIA1 is required for respiration YJL104W S000003640
YOL042W	-	-	0.174885	NGL1	Putative endonuclease, has a domain similar to a magnesium-dependent endonuclease motif in mRNA deadenylase Ccr4p; the authentic, non-tagged protein is detected in highly purified mitochondria in high-throughput studies YOL042W S000005402
YIL008W	-	-	0.17388	URM1	Ubiquitin-like protein with weak sequence similarity to ubiquitin; depends on the E1-like activating enzyme Uba4p; molecular function of the Urm1p pathway is unknown, but it is required for normal growth, particularly at high temperature Null mutant is viable and has temperature-sensitive growth defect at 37 degrees C YIL008W S000001270
YLL026W	-	-	0.173353	HSP104	Heat shock protein that cooperates with Ydj1p (Hsp40) and Ssa1p (Hsp70) to refold and reactivate previously denatured, aggregated proteins; responsive to stresses including: heat, ethanol, and sodium arsenite; involved in [PSI+] propagation Null mutant is viable and defective in induced thermotolerance YLL026W S000003949
YMR011W	-	-	0.172137	HXT2	High-affinity glucose transporter of the major facilitator superfamily, expression is induced by low levels of glucose and repressed by high levels of glucose YMR011W S000004613
YIL053W	-	-	0.170835	RHR2	GPP1 Constitutively expressed isoform of DL-glycerol-3-phosphatase; involved in glycerol biosynthesis, induced in response to both anaerobic and, along with the Hor2p/Gpp2p isoform, osmotic stress Mutants lacking RHR2 show poor anaerobic growth. Mutants lacking RHR2 and HOR2 lack glycerol 3-phosphatase activity, produce only a small amount of glycerol. Overproduction of both genes does not signif…
YGR019W	-	-	0.170835	UGA1	Gamma-aminobutyrate (GABA) transaminase (4-aminobutyrate aminotransferase) involved in the 4-aminobutyrate and glutamate degradation pathways; required for normal oxidative stress tolerance and nitrogen utilization YGR019W S000003251
YFL055W	-	-	0.16997	AGP3	Low-affinity amino acid permease, may act to supply the cell with amino acids as nitrogen source in nitrogen-poor conditions; transcription is induced under conditions of sulfur limitation; plays a role in regulating Ty1 transposition Null mutant is viable; loss of growth on some amino acids as nitrogen source (leu, thr) in a strain which has no Gap1p or Agp1p function YFL055W S000001839
YDR225W	-	-	0.166534	HTA1	H2A1|SPT11 One of two nearly identical (see also HTA2) histone H2A subtypes; core histone required for chromatin assembly and chromosome function; DNA damage-dependent phosphorylation by Mec1p facilitates DNA repair; acetylated by Nat4p YDR225W S000002633
YLR459W	-	-	0.165606	GAB1	CDC91 GPI transamidase subunit, involved in attachment of glycosylphosphatidylinositol (GPI) anchors to proteins; may have a role in recognition of the attachment signal or of the lipid portion of GPI YLR459W S000004451
YKL086W	-	-	0.164404	SRX1	Sulfiredoxin, contributes to oxidative stress resistance by reducing cysteine-sulfinic acid groups in the peroxiredoxins Tsa1p and Ahp1p that are formed upon exposure to oxidants; conserved in higher eukaryotes Null: sensitivity to hydroperoxide, overoxidation of Tsa1 catalytic cysteine to the sulfinic acid form YKL086W S000001569
YDR158W	-	-	0.164346	HOM2	Aspartic beta semi-aldehyde dehydrogenase, catalyzes the second step in the common pathway for methionine and threonine biosynthesis; expression regulated by Gcn4p and the general control of amino acid synthesis Homoserine requiring YDR158W S000002565
YJR118C	-	-	0.164213	ILM1	Protein of unknown function; may be involved in mitochondrial DNA maintenance; required for slowed DNA synthesis-induced filamentous growth YJR118C S000003879
YPL033C	-	-	0.163574		NO_MATCH
YDL146W	-	-	0.163569	LDB17	Protein of unknown function; GFP-fusion protein localizes to the cell periphery, cytoplasm, bud, and bud neck; null mutant shows a reduced affinity for the alcian blue dye suggesting a decreased net negative charge of the cell surface YDL146W S000002305
YMR176W	-	-	0.163556	ECM5	Non-essential protein of unknown function, contains ATP/GTP-binding site motif A; null mutant exhibits cellular volume up to four times greater than wild-type, also large drooping buds with elongated necks YMR176W S000004788
YHR080C	-	-	0.161551		NO_MATCH
YAL043C-A	-	-	0.161446		NO_MATCH
YGL023C	-	-	0.161124	PIB2	Protein binding phosphatidylinositol 3-phosphate, involved in telomere-proximal repression of gene expression; similar to Fab1 and Vps27 YGL023C S000002991
YML046W	-	-	0.160983	PRP39	U1 snRNP protein involved in splicing, contains multiple tetriatricopeptide repeats Temperature-sensitive mutant arrests at the nonpermissive temperature and shows block in pre-mRNA splicing YML046W S000004509
YBL093C	-	-	0.160357	ROX3	MED19|NUT3|SSN7 Subunit of the RNA polymerase II mediator complex; associates with core polymerase subunits to form the RNA polymerase II holoenzyme YBL093C S000000189
YDR528W	-	-	0.160054	HLR1	Protein involved in regulation of cell wall composition and integrity and response to osmotic stress; overproduction suppresses a lysis sensitive PKC mutation; similar to Lre1p, which functions antagonistically to protein kinase A YDR528W S000002936
YJR077C	-	-	0.158932	MIR1	Mitochondrial phosphate carrier, imports inorganic phosphate into mitochondria; functionally redundant with Pic2p but more abundant than Pic2p under normal conditions; phosphorylated Null mutant is viable on glucose containing media, but is unable to grow on a non-fermentable carbon source, shows reduced levels of mitochondrial proteins YJR077C S000003838
YIR015W	-	-	0.158932	RPR2	Subunit of nuclear RNase P, which cleaves tRNA precursors to generate mature 5' ends; not shared between RNase MRP and RNase P, in contrast to all other RNase P protein subunits Null mutant is inviable; transient depletions cause loss of RNase P YIR015W S000001454
YKL070W	-	-	0.158344		NO_MATCH
YER037W	-	-	0.158229	PHM8	Protein of unknown function, expression is induced by low phosphate levels and by inactivation of Pho85p YER037W S000000839
YGR285C	-	-	0.157872	ZUO1	Cytosolic ribosome-associated chaperone that acts, together with Ssz1p and the Ssb proteins, as a chaperone for nascent polypeptide chains; contains a DnaJ domain and functions as a J-protein partner for Ssb1p and Ssb2p YGR285C S000003517
YCRX20C	-	-	0.15355		NO_MATCH
YLR304C	-	-	0.151423	ACO1	GLU1 Aconitase, required for the tricarboxylic acid (TCA) cycle and also independently required for mitochondrial genome maintenance; phosphorylated; component of the mitochondrial nucleoid; mutation leads to glutamate auxotrophy YLR304C S000004295
YMR166C	-	-	0.151095		NO_MATCH
YDR386W	-	-	0.150997	MUS81	SLX3 Helix-hairpin-helix protein, involved in DNA repair and replication fork stability; functions as an endonuclease in complex with Mms4p; interacts with Rad54p Null mutant is viable but is MMS and UV sensitive and meiosis defective, null is synthetically lethal with sgs1 null YDR386W S000002794
YDR080W	-	-	0.149685	VPS41	CVT8|FET2|SVL2|VAM2|VPL20 Vacuolar membrane protein that is a subunit of the homotypic vacuole fusion and vacuole protein sorting (HOPS) complex; essential for membrane docking and fusion at the Golgi-to-endosome and endosome-to-vacuole stages of protein transport Null mutant is viable, associated with fragmented vacuoles, exhibits defective high affinity transport due to impaired Fet3p activity …
YKL154W	-	-	0.149577	SRP102	Signal recognition particle (SRP) receptor beta subunit; involved in SRP-dependent protein targeting; anchors Srp101p to the ER membrane Null mutant is viable but exhibits slow growth and cannot grow on nonfermentable carbon sources. Temperature-sensitive alleles exhibit defects in translocation of some ER proteins at the nonpermissive temperature. YKL154W S000001637
YMR052W	-	-	0.148262	FAR3	Protein involved in G1 cell cycle arrest in response to pheromone, in a pathway different from the Far1p-dependent pathway; interacts with Far7p, Far8p, Far9p, Far10p, and Far11p Null mutant does not arrest in G1 in response to pheromone but does have an intact signal transduction pathway leading to FAR1 transcriptional induction YMR052W S000004656
YLR167W	-	-	0.146933	RPS31	RPS37|UBI3 Fusion protein that is cleaved to yield a ribosomal protein of the small (40S) subunit and ubiquitin; ubiquitin may facilitate assembly of the ribosomal protein into ribosomes; interacts genetically with translation factor eIF2B YLR167W S000004157
YKL188C	-	-	0.146592	PXA2	PAT1 Subunit of a heterodimeric peroxisomal ATP-binding cassette transporter complex (Pxa1p-Pxa2p), required for import of long-chain fatty acids into peroxisomes; similarity to human adrenoleukodystrophy transporter and ALD-related proteins Null mutant is viable; reduces stability of Pxa1p YKL188C S000001671
YJL130C	-	-	0.145841	URA2	Bifunctional carbamoylphosphate synthetase (CPSase)-aspartate transcarbamylase (ATCase), catalyzes the first two enzymatic steps in the de novo biosynthesis of pyrimidines; both activities are subject to feedback inhibition by UTP uracil requiring YJL130C S000003666
YPR010C	-	-	0.145262	RPA135	RPA2|RRN2|SRP3 RNA polymerase I subunit A135 suppression of rpb1, cold sensitive YPR010C S000006214
YKL062W	-	-	0.144938	MSN4	Transcriptional activator related to Msn2p; activated in stress conditions, which results in translocation from the cytoplasm to the nucleus; binds DNA at stress response elements of responsive genes, inducing gene expression Null mutant is viable; msn2 msn4 double deletion mutants exhibit higher sensitivity to different stresses, including carbon source starvation, heat shock and severe osmotic …
YDR306C	-	-	0.143825		NO_MATCH
YKL155C	-	-	0.143383	RSM22	Mitochondrial ribosomal protein of the small subunit Null mutant is viable, unable to respire YKL155C S000001638
YPL197C	-	-	0.143235		NO_MATCH
YDR441C	-	-	0.142903	APT2	Apparent pseudogene, not transcribed or translated under normal conditions; encodes a protein with similarity to adenine phosphoribosyltransferase, but artificially expressed protein exhibits no enzymatic activity YDR441C S000002849
YBR247C	-	-	0.142252	ENP1	MEG1 Protein associated with U3 and U14 snoRNAs, required for pre-rRNA processing and 40S ribosomal subunit synthesis; localized in the nucleus and concentrated in the nucleolus YBR247C S000000451
YPR113W	-	-	0.141856	PIS1	Phosphatidylinositol synthase, required for biosynthesis of phosphatidylinositol, which is a precursor for polyphosphoinositides, sphingolipids, and glycolipid anchors for some of the plasma membrane proteins YPR113W S000006317
YOR251C	-	-	0.141856		NO_MATCH
YER163C	-	-	0.140898		NO_MATCH
YMR108W	-	-	0.139187	ILV2	SMR1|THI1 Acetolactate synthase, catalyses the first common step in isoleucine and valine biosynthesis and is the target of several classes of inhibitors, localizes to the mitochondria; expression of the gene is under general amino acid control Isoleucine-plus-valine requiring; Sulfometuron methyl resistance YMR108W S000004714
YFR055W	-	+	0.138691	IRC7	Putative cystathionine beta-lyase; involved in copper ion homeostasis and sulfur metabolism; null mutant displays increased levels of spontaneous Rad52p foci; expression induced by nitrogen limitation in a GLN3, GAT1-dependent manner YFR055W S000001952
YCL003W	-	-	0.137138		NO_MATCH
YDL147W	-	-	0.136359	RPN5	NAS5 Essential, non-ATPase regulatory subunit of the 26S proteasome lid, similar to mammalian p55 subunit and to another S. cerevisiae regulatory subunit, Rpn7p YDL147W S000002306
YMR092C	-	-	0.136359	AIP1	Actin cortical patch component, interacts with the actin depolymerizing factor cofilin; required to restrict cofilin localization to cortical patches; contains WD repeats YMR092C S000004698
YKL100C	-	-	0.134656		NO_MATCH
YLL063C	-	-	0.134264	AYT1	Acetyltransferase; catalyzes trichothecene 3-O-acetylation, suggesting a possible role in trichothecene biosynthesis YLL063C S000003986
YNL052W	-	-	0.131983	COX5A	Subunit Va of cytochrome c oxidase, which is the terminal member of the mitochondrial inner membrane electron transport chain; predominantly expressed during aerobic growth while its isoform Vb (Cox5Bp) is expressed during anaerobic growth Null mutant is viable, respires at 10-15% of the wild-type rate due to the presence of COX5B; cox5a cox5b double deletion mutants are completely non-respirator…
YHL034C	-	-	0.13163	SBP1	SSB1|SSBR1 Putative RNA binding protein; involved in translational repression and found in cytoplasmic P bodies; found associated with small nucleolar RNAs snR10 and snR11 YHL034C S000001026
YGR084C	-	-	0.131401	MRP13	Mitochondrial ribosomal protein of the small subunit Null mutant is viable, no impairment in ribosome synthesis or function YGR084C S000003316
YKR022C	-	-	0.130556	NTR2	Essential protein that forms a dimer with Ntr1p; also forms a trimer, with Ntr2p and the DExD/H-box RNA helicase Prp43p, that is involved in spliceosome disassembly YKR022C S000001730
YLL066C	-	-	0.129807		NO_MATCH
YJL159W	-	-	0.129567	HSP150	CCW7|ORE1|PIR2 O-mannosylated heat shock protein that is secreted and covalently attached to the cell wall via beta-1,3-glucan and disulfide bridges; required for cell wall stability; induced by heat shock, oxidative stress, and nitrogen limitation YJL159W S000003695
YIL093C	-	-	0.129379	RSM25	Mitochondrial ribosomal protein of the small subunit Null mutant is viable, but unable to respire. YIL093C S000001355
YDR251W	-	-	0.129045	PAM1	Essential protein of unknown function; exhibits variable expression during colony morphogenesis; overexpression permits survival without protein phosphatase 2A, inhibits growth, and induces a filamentous phenotype Multicopy PAM1 suppresses loss of protein phosphatase 2A (PP2A, encoded by PPH21, PPH21, and PPH3); overexpression of PAM1 inhibits growth and causes a filamentous phenotype YDR251W S00…
YLR346C	-	-	0.127148		NO_MATCH
YFL030W	-	-	0.126855	AGX1	Alanine:glyoxylate aminotransferase (AGT), catalyzes the synthesis of glycine from glyoxylate, which is one of three pathways for glycine biosynthesis in yeast; has similarity to mammalian and plant alanine:glyoxylate aminotransferases YFL030W S000001864
YDR069C	-	-	0.124602	DOA4	DOS1|MUT4|NPI2|SSV7|UBP4 Ubiquitin isopeptidase, required for recycling ubiquitin from proteasome-bound ubiquitinated intermediates, acts at the late endosome/prevacuolar compartment to recover ubiquitin from ubiquitinated membrane proteins en route to the vacuole Null mutant is viable, but exhibits uncoordinated DNA replication|A nonsense mutation in the doa4-10 mutant eliminates the catalytic r…
YHR169W	-	-	0.122266	DBP8	Putative ATP-dependent RNA helicase of the DEAD-box family involved in biogenesis of the 40S ribosomal subunit YHR169W S000001212
YJL077C	-	-	0.122186	ICS3	Protein of unknown function YJL077C S000003613
YOR059C	-	-	0.121632		NO_MATCH
YDL224C	-	-	0.121607	WHI4	Putative RNA binding protein and partially redundant Whi3p homolog that regulates the cell size requirement for passage through Start and commitment to cell division Null mutant increases severity of the Whi phenotype of whi3. YDL224C S000002383
YMR008C	-	-	0.121358	PLB1	Phospholipase B (lysophospholipase) involved in lipid metabolism, required for deacylation of phosphatidylcholine and phosphatidylethanolamine but not phosphatidylinositol Null mutant is viable but releases greatly reduced levels of phosphatidylcholine and phosphatidylethanolamine metabolites YMR008C S000004610
YKR089C	-	-	0.120779	TGL4	STC1 Triacylglycerol lipase involved in triacylglycerol mobilization and degradation; found in lipid particles; potential Cdc28p substrate YKR089C S000001797
YGR121C	-	-	0.119542	MEP1	AMT1 Ammonium permease; belongs to a ubiquitous family of cytoplasmic membrane proteins that transport only ammonium (NH4+); expression is under the nitrogen catabolite repression regulation YGR121C S000003353
YMR314W	-	-	0.119333	PRE5	Alpha 6 subunit of the 20S proteasome YMR314W S000004931
YMR296C	-	-	0.119309	LCB1	END8|TSC2 Component of serine palmitoyltransferase, responsible along with Lcb2p for the first committed step in sphingolipid synthesis, which is the condensation of serine with palmitoyl-CoA to form 3-ketosphinganine Null mutant is auxotrophic for long-chain component of sphingolipids; homozygous lcb1 diploids fail to sporulate YMR296C S000004911
YFR011C	-	-	0.118933	AIM13	Putative protein of unknown function; non-tagged protein is detected in highly purified mitochondria; null mutant displays increased frequency of mitochondrial genome loss (petite formation) and reduced growth rate in minimal glycerol media YFR011C S000001907
YLR216C	-	-	0.11893	CPR6	CYP40 Peptidyl-prolyl cis-trans isomerase (cyclophilin), catalyzes the cis-trans isomerization of peptide bonds N-terminal to proline residues; binds to Hsp82p and contributes to chaperone activity Null mutant is viable, has normal growth rate YLR216C S000004206
YER132C	-	-	0.118562	PMD1	Protein with an N-terminal kelch-like domain, putative negative regulator of early meiotic gene expression; required, with Mds3p, for growth under alkaline conditions YER132C S000000934
YJR160C	-	-	0.115264	MPH3	Alpha-glucoside permease, transports maltose, maltotriose, alpha-methylglucoside, and turanose; identical to Mph2p; encoded in a subtelomeric position in a region likely to have undergone duplication YJR160C S000003921
YDR423C	-	-	0.115167	CAD1	YAP2 AP-1-like bZIP transcriptional activator involved in stress responses, iron metabolism, and pleiotropic drug resistance; controls a set of genes involved in stabilizing proteins; binds consensus sequence TTACTAA; 5' UTR contains uORFs YDR423C S000002831
YPL059W	-	-	0.112687	GRX5	Hydroperoxide and superoxide-radical responsive glutathione-dependent oxidoreductase; mitochondrial matrix protein involved in the synthesis/assembly of iron-sulfur centers; monothiol glutaredoxin subfamily member along with Grx3p and Grx4p Null mutant is viable and shows high sensitivity to oxidative stress and increased sensitivity to osmotic stress, and increased oxidation levels of cell prote…
YHR087W	-	-	0.112529	RTC3	Protein of unknown function involved in RNA metabolism; has structural similarity to SBDS, the human protein mutated in Shwachman-Diamond Syndrome (the yeast SBDS ortholog = SDO1); null mutation suppresses cdc13-1 temperature sensitivity YHR087W S000001129
YML012W	-	-	0.112501	ERV25	Protein that forms a heterotrimeric complex with Erp1, Erp2p, and Emp24, member of the p24 family involved in endoplasmic reticulum to Golgi transport Null mutant is viable, displays a selective defect in transport of secretory proteins from the ER to Golgi complex. YML012W S000004473
YOR128C	-	-	0.111266	ADE2	Phosphoribosylaminoimidazole carboxylase, catalyzes a step in the 'de novo' purine nucleotide biosynthetic pathway; red pigment accumulates in mutant cells deprived of adenine Null mutant is viable and requires adenine. ade2 mutants are blocked at a stage in the adenine biosynthetic pathway that causes an intermediate to accumulate in the vacuole; the intermediate gives the cell a red color. YOR1…
YOR153W	-	-	0.110919	PDR5	LEM1|STS1|YDR1 Plasma membrane ATP-binding cassette (ABC) transporter, short-lived multidrug transporter actively regulated by Pdr1p; also involved in steroid transport, cation resistance, and cellular detoxification during exponential growth pleiotropic drug resistance YOR153W S000005679
YLR178C	-	-	0.110845	TFS1	DKA1 Carboxypeptidase Y inhibitor, function requires acetylation by the NatB N-terminal acetyltransferase; phosphatidylethanolamine-binding protein involved in protein kinase A signaling pathway YLR178C S000004168
YMR102C	-	-	0.1102		NO_MATCH
YIL091C	-	-	0.1102		NO_MATCH
YCL051W	-	-	0.1102	LRE1	Protein involved in control of cell wall structure and stress response; inhibits Cbk1p protein kinase activity; overproduction confers resistance to cell-wall degrading enzymes Null mutant is viable; overexpression of both LRE1 and PBN1 confers resistance to laminarinase, which specifically degrades cell wall beta(1,3) glucan linkages YCL051W S000000556
YBR216C	-	-	0.109491	YBP1	Protein required for oxidation of specific cysteine residues of the transcription factor Yap1p, resulting in the nuclear localization of Yap1p in response to stress YBR216C S000000420
YBR243C	-	-	0.108814	ALG7	TUR1 UDP-N-acetyl-glucosamine-1-P transferase, transfers Glc-Nac-P from UDP-GlcNac to Dol-P in the ER in the first step of the dolichol pathway of protein asparagine-linked glycosylation; inhibited by tunicamycin Asparagine-linked glycosylation deficient; Null mutant is inviable YBR243C S000000447
YJR030C	-	-	0.108768		NO_MATCH
YLR162W_dup	-	-	0.108411		NO_MATCH
YCL026C-A	-	-	0.108411	FRM2	YCLX08C Protein of unknown function, involved in the integration of lipid signaling pathways with cellular homeostasis; similar to bacterial nitroreductases Null mutant is viable and sensitive to arachidonic acid YCL026C-A S000000589
YNL133C	-	-	0.10821	FYV6	Protein of unknown function, required for survival upon exposure to K1 killer toxin; proposed to regulate double-strand break repair via non-homologous end-joining Null mutant is K1 killer toxin hypersensitive YNL133C S000005077
YHR190W	-	-	0.107949	ERG9	Farnesyl-diphosphate farnesyl transferase (squalene synthase), joins two farnesyl pyrophosphate moieties to form squalene in the sterol biosynthesis pathway YHR190W S000001233
YOR081C	-	-	0.107698	TGL5	STC2 Triacylglycerol lipase involved in TAG mobilization; localizes to lipid particles; potential Cdc28p substrate YOR081C S000005607
YCL017C	-	+	0.107342	NFS1	SPL1 Cysteine desulfurase involved in iron-sulfur cluster (Fe/S) biogenesis; required for the post-transcriptional thio-modification of mitochondrial and cytoplasmic tRNAs; essential protein located predominantly in mitochondria Null mutant is inviable; spl1-1 mutant allele affects tRNA splicing YCL017C S000000522
YHR213W	-	-	0.10725		NO_MATCH
YGR076C	-	-	0.105907	MRPL25	YMR26 Mitochondrial ribosomal protein of the large subunit Null mutant is viable, cells become Pet- YGR076C S000003308
YJR097W	-	-	0.10451	JJJ3	DPH4 Protein of unknown function, contains a J-domain, which is a region with homology to the E. coli DnaJ protein YJR097W S000003858
YNL014W	-	-	0.102402	HEF3	ZRG7 Translational elongation factor EF-3; paralog of YEF3 and member of the ABC superfamily; stimulates EF-1 alpha-dependent binding of aminoacyl-tRNA by the ribosome; normally expressed in zinc deficient cells YNL014W S000004959
YGR230W	-	-	0.102374	BNS1	Protein with some similarity to Spo12p; overexpression bypasses need for Spo12p, but not required for meiosis Null mutant is viable and exhibits no obvious meiotic defects. When overexpressed, BNS1 can partially suppress the meiotic defect of spo12/spo12 deletion mutants. YGR230W S000003462
YBL052C	-	-	0.101669	SAS3	Histone acetyltransferase catalytic subunit of NuA3 complex that acetylates histone H3, involved in transcriptional silencing; homolog of the mammalian MOZ proto-oncogene; sas3 gcn5 double mutation confers lethality YBL052C S000000148
YER123W	-	-	0.101497	YCK3	CKI3 Palmitoylated, vacuolar membrane-localized casein kinase I isoform; negatively regulates vacuole fusion during hypertonic stress via phosphorylation of the HOPS complex subunit, Vps41p; shares overlapping essential functions with Hrr25p Null mutant is viable; multiple copies suppress gcs1-induced blockage of cell proliferation from stationary phase YER123W S000000925
YOL143C	-	-	0.101354	RIB4	Lumazine synthase (6,7-dimethyl-8-ribityllumazine synthase, also known as DMRL synthase); catalyzes synthesis of immediate precursor to riboflavin Null mutant is viable but is a riboflavin auxotroph YOL143C S000005503
YOR097C	-	-	0.0997554		NO_MATCH
YOR058C	-	-	0.09892	ASE1	YOR29-09 Mitotic spindle midzone localized microtubule-associated protein (MAP) family member; required for spindle elongation and stabilization; undergoes cell cycle-regulated degradation by anaphase promoting complex; potential Cdc28p substrate Null mutant is viable but temperature sensitive. YOR058C S000005584
YGL217C	-	-	0.09892		NO_MATCH
YPL057C	-	-	0.0987559	SUR1	BCL21|CSG1|LPE15 Probable catalytic subunit of a mannosylinositol phosphorylceramide (MIPC) synthase, forms a complex with probable regulatory subunit Csg2p; function in sphingolipid biosynthesis is overlapping with that of Csh1p Null mutant is viable, calcium sensitive at 37 degrees C on YPD but calcium tolerant at 26 degrees C, accumulates greatly reduced levels of several mannosylated sphingol…
YNL277W	-	-	0.0982458	MET2	L-homoserine-O-acetyltransferase, catalyzes the conversion of homoserine to O-acetyl homoserine which is the first step of the methionine biosynthetic pathway Null mutant is viable, and is a methionine auxotroph YNL277W S000005221
YCR020C	-	-	0.0970874	PET18	HIT2 Protein required for respiratory growth and stability of the mitochondrial genome petite; unable to grow on non-fermentable carbon sources YCR020C S000000613
YLL035W	-	-	0.0954756	GRC3	Protein of unknown function, required for cell growth and possibly involved in rRNA processing; mRNA is cell cycle regulated YLL035W S000003958
YBR273C	-	-	0.0954756	UBX7	CUI3 UBX (ubiquitin regulatory X) domain-containing protein that interacts with Cdc48p YBR273C S000000477
YNL241C	-	-	0.0954756	ZWF1	MET19|POS10 Glucose-6-phosphate dehydrogenase (G6PD), catalyzes the first step of the pentose phosphate pathway; involved in adapting to oxidatve stress; homolog of the human G6PD which is deficient in patients with hemolytic anemia YNL241C S000005185
YMR083W	-	-	0.0954388	ADH3	Mitochondrial alcohol dehydrogenase isozyme III; involved in the shuttling of mitochondrial NADH to the cytosol under anaerobic conditions and ethanol production YMR083W S000004688
YAL038W	-	-	0.0929492	CDC19	PYK1 Pyruvate kinase, functions as a homotetramer in glycolysis to convert phosphoenolpyruvate to pyruvate, the input for aerobic (TCA cycle) or anaerobic (glucose fermentation) respiration Null mutant is inviable. cdc19 mutants are pyruvate kinase deficient and show cell division cycle blocked at 36 degrees C YAL038W S000000036
YIL165C	-	-	0.09219		NO_MATCH
YBR155W	-	-	0.0920683	CNS1	TPR-containing co-chaperone; binds both Hsp82p (Hsp90) and Ssa1p (Hsp70) and stimulates the ATPase activity of SSA1, ts mutants reduce Hsp82p function while over expression suppresses the phenotypes of an HSP82 ts allele and a cpr7 deletion Null mutant is inviable; overexpression of CNS1 restores normal growth and Hsp90 activity in a cpr7 mutant strain. YBR155W S000000359
YML011C	-	-	0.0920683	RAD33	Protein involved in nucleotide excision repair; green fluorescent protein (GFP)-fusion protein localizes to the nucleus YML011C S000004472
YJR119C	-	-	0.0920683	JHD2	KDM5 JmjC domain family histone demethylase specific for H3-K4 (lysine at position 4 of the histone H3 protein); removes methyl groups specifically added by Set1p methyltransferase YJR119C S000003880
YDR146C	-	-	0.0920683	SWI5	Transcription factor that activates transcription of genes expressed at the M/G1 phase boundary and in G1 phase; localization to the nucleus occurs during G1 and appears to be regulated by phosphorylation by Cdc28p kinase homothallic switching deficient YDR146C S000002553
YPL034W	-	-	0.0904322		NO_MATCH
YML116W	-	-	0.0889743	ATR1	SNQ1 Multidrug efflux pump of the major facilitator superfamily, required for resistance to aminotriazole and 4-nitroquinoline-N-oxide Null mutant is viable, but is sensitive to very low (5 mM) levels of aminotriazole and to 4-nitroquinoline-N-oxide (4-NQO); multiple copies of ATR1 confer hyper-resistance to 4-NQO; multiple copies of ATR1 in gcn4 background confer resistance to high (80mM) levels…
YKL111C	-	-	0.0886974		NO_MATCH
YDR194C	-	-	0.0886631	MSS116	DEAD-box protein required for efficient splicing of mitochondrial Group I and II introns; non-polar RNA helicase that also facilities strand annealing mss116 mutations affect the splicing of several introns of the cytochrome B and cytochrome C oxidase subunit I primary transcripts YDR194C S000002602
YEAST GEN. DNA 0.2 MG/ML	-	-	0		NO_MATCH
YBR085W	-	-	0.0866632	AAC3	ANC3 Mitochondrial inner membrane ADP/ATP translocator, exchanges cytosolic ADP for mitochondrially synthesized ATP; expressed under anaerobic conditions; similar to Pet9p and Aac1p; has roles in maintenance of viability and in respiration Null mutant is viable; pet9,aac3 double null mutant is inviable under anaerobic conditions YBR085W S000000289
YCR104W	-	-	0.0856749	PAU3	Part of 23-member seripauperin multigene family encoded mainly in subtelomeric regions, active during alcoholic fermentation, regulated by anaerobiosis, negatively regulated by oxygen, repressed by heme YCR104W S000000701
YDR294C	-	-	0.085362	DPL1	BST1 Dihydrosphingosine phosphate lyase, regulates intracellular levels of sphingolipid long-chain base phosphates (LCBPs), degrades phosphorylated long chain bases, prefers C16 dihydrosphingosine-l-phosphate as a substrate YDR294C S000002702
YOL048C	-	-	0.0843893		NO_MATCH
YLR367W	-	-	0.0842354	RPS22B	Protein component of the small (40S) ribosomal subunit; nearly identical to Rps22Ap and has similarity to E. coli S8 and rat S15a ribosomal proteins YLR367W S000004359
YPL157W	-	-	0.0823694	TGS1	Trimethyl guanosine synthase, conserved nucleolar methyl transferase responsible for conversion of the m(7)G cap structure of snRNAs and snoRNAs to m(2,2,7)G; also required for ribosome synthesis and nucleolar morphology YPL157W S000006078
YHR177W	-	-	0.0823163		NO_MATCH
YGL186C	-	-	0.0787955	TPN1	Plasma membrane pyridoxine (vitamin B6) transporter; member of the purine-cytosine permease subfamily within the major facilitator superfamily; proton symporter with similarity to Fcy21p, Fcy2p, and Fcy22p YGL186C S000003154
YLR196W	-	-	0.0787955	PWP1	Protein with WD-40 repeats involved in rRNA processing; associates with trans-acting ribosome biogenesis factors; similar to beta-transducin superfamily Null mutants are viable but show severely retarded growth YLR196W S000004186
YLL062C	-	-	0.0787955	MHT1	S-methylmethionine-homocysteine methyltransferase, functions along with Sam4p in the conversion of S-adenosylmethionine (AdoMet) to methionine to control the methionine/AdoMet ratio Does not use S-methylmethionine as a sulfur source YLL062C S000003985
YPR035W	-	-	0.0777423	GLN1	Glutamine synthetase (GS), synthesizes glutamine from glutamate and ammonia; with Glt1p, forms the secondary pathway for glutamate biosynthesis from ammonia; expression regulated by nitrogen source and by amino acid limitation Glutamine synthetase non-derepressible YPR035W S000006239
YDR121W	-	-	0.0758269	DPB4	Shared subunit of DNA polymerase (II) epsilon and of ISW2/yCHRAC chromatin accessibility complex; involved in both chromosomal DNA replication and in inheritance of telomeric silencing YDR121W S000002528
YNL191W	-	-	0.0755629	DUG3	Probable glutamine amidotransferase, forms a complex with Dug1p and Dug2p to degrade glutathione (GSH) and other peptides containing a gamma-glu-X bond in an alternative pathway to GSH degradation by gamma-glutamyl transpeptidase (Ecm38p) YNL191W S000005135
YKR035W-A	-	-	0.0755629	DID2	CHM1|FTI1|VPS46 Class E protein of the vacuolar protein-sorting (Vps) pathway; binds Vps4p and directs it to dissociate ESCRT-III complexes; associates reversibly with the late endosome; human ortholog may be altered in breast tumors Overexpression causes growth inhibition and G2 arrest in rad52 and cdc9 mutants; null mutants are canavanine-hypersensitive, temperature sensitive, and suppress defe…
YFR033C	-	-	0.0751493	QCR6	COR3|UCR6 Subunit 6 of the ubiquinol cytochrome-c reductase complex, which is a component of the mitochondrial inner membrane electron transport chain; highly acidic protein; required for maturation of cytochrome c1 Disruptants are viable but are temperature-sensitive petite, lacking ubiquinol-cytochrome c oxidoreductase activity and showing loss of assembly of cytochrome bc1 complex; qcr6 is sup…
YOR322C	-	-	0.0726654	LDB19	Protein of unknown function involved in maintenance of proper telomere length; null mutant shows a reduced affinity for the alcian blue dye suggesting a decreased net negative charge of the cell surface YOR322C S000005849
YOR262W	-	-	0.0723669		NO_MATCH
YPL099C	-	-	0.0691962	AIM43	FMP14 Protein of unknown function;non-tagged protein detected in purified mitochondria in high-throughput studies; null mutant displays increased frequency of mitochondrial genome loss and severe growth defect in minimal glycerol media YPL099C S000006020
YKL183W	-	-	0.0691962	LOT5	Protein of unknown function; gene expression increases in cultures shifted to a lower temperature YKL183W S000001666
YJR091C	-	-	0.0691962	JSN1	PUF1 Member of the Puf family of RNA-binding proteins, interacts with mRNAs encoding membrane-associated proteins; overexpression suppresses a tub2-150 mutation and causes increased sensitivity to benomyl in wild-type cells Overexpression suppresses some tub2 alleles and confers greater benomyl sensitivity YJR091C S000003851
YDR337W	-	-	0.0691962	MRPS28	Mitochondrial ribosomal protein of the small subunit Null mutant is viable, unable to respire, spontaneously loses portions of its mitochondrial genomes at a high frequencY YDR337W S000002745
YDR145W	-	-	0.0691962	TAF12	TAF61|TAF68 Subunit (61/68 kDa) of TFIID and SAGA complexes, involved in RNA polymerase II transcription initiation and in chromatin modification, similar to histone H2A YDR145W S000002552
YMR221C	-	-	0.0689999	FMP42	Putative protein of unknown function; the authentic, non-tagged protein is detected in highly purified mitochondria in high-throughput studies YMR221C S000004834
YGL013C	-	-	0.0669507	PDR1	AMY1|ANT1|BOR2|CYH3|NRA2|SMR2|TIL1|TPE1|TPE3 Zinc cluster protein that is a master regulator involved in recruiting other zinc cluster proteins to pleiotropic drug response elements (PDREs) to fine tune the regulation of multidrug resistance genes pleiotropic drug resistance, resistant to borrelidin, oligomycin, antimycin, cycloheximide, antibiotic, thioisoleucine, sulfometuron methyl; accumulati…
YMR276W	-	-	0.0660608	DSK2	Nuclear-enriched ubiquitin-like polyubiquitin-binding protein, required for spindle pole body (SPB) duplication and for transit through the G2/M phase of the cell cycle, involved in proteolysis, interacts with the proteasome YMR276W S000004889
YDL112W	-	-	0.0660608	TRM3	2'-O-ribose methyltransferase, catalyzes the ribose methylation of the guanosine nucleotide at position 18 of tRNAs Null mutants are defective specifically for Gm18 tRNA ribose methylation YDL112W S000002270
YIL123W	-	-	0.0646797	SIM1	Protein of the SUN family (Sim1p, Uth1p, Nca3p, Sun4p) that may participate in DNA replication, promoter contains SCB regulation box at -300 bp indicating that expression may be cell cycle-regulated Null mutant is viable; mutant allows an extra round of DNA replication without mitosis YIL123W S000001385
YGR136W	-	-	0.0639439	LSB1	Protein containing an N-terminal SH3 domain; binds Las17p, which is a homolog of human Wiskott-Aldrich Syndrome protein involved in actin patch assembly and actin polymerization YGR136W S000003368
YPR190C	-	-	0.0629566	RPC82	RPC3 RNA polymerase III subunit C82 YPR190C S000006394
YNL078W	-	-	0.0629566	NIS1	JIP1 Protein localized in the bud neck at G2/M phase; physically interacts with septins; possibly involved in a mitotic signaling network YNL078W S000005022
YHR040W	-	-	0.0629566	BCD1	Essential protein required for the accumulation of box C/D snoRNA YHR040W S000001082
YFR022W	-	-	0.0629566	ROG3	Protein that binds to Rsp5p, which is a hect-type ubiquitin ligase, via its 2 PY motifs; has similarity to Rod1p; mutation suppresses the temperature sensitivity of an mck1 rim11 double mutant YFR022W S000001918
YDL174C	-	-	0.0628	DLD1	D-lactate dehydrogenase, oxidizes D-lactate to pyruvate, transcription is heme-dependent, repressed by glucose, and derepressed in ethanol or lactate; located in the mitochondrial inner membrane Null mutant is viable and cannot grow on media containing lactate as the sole carbon source YDL174C S000002333
YPR026W	-	-	0.0601088	ATH1	Acid trehalase required for utilization of extracellular trehalose Null mutant is viable; shows lack of vacuolar acid trehalase activity YPR026W S000006230
YOR252W	-	-	0.059883	TMA16	RBF17 Protein of unknown function that associates with ribosomes YOR252W S000005778
YLR106C	-	-	0.0593637	MDN1	REA1 Huge dynein-related AAA-type ATPase (midasin), forms extended pre-60S particle with the Rix1 complex (Rix1p-Ipi1p-Ipi3p), may mediate ATP-dependent remodeling of 60S subunits and subsequent export from nucleoplasm to cytoplasm YLR106C S000004096
YDR367W	-	-	0.05691		NO_MATCH
YKL011C	-	-	0.0568395	CCE1	MGT1 Mitochondrial cruciform cutting endonuclease, cleaves Holliday junctions formed during recombination of mitochondrial DNA Null mutant is viable, exhibits a higher than normal frequency of appearance of petite cells YKL011C S000001494
YER168C	-	-	0.0568395	CCA1	TNT1 ATP (CTP):tRNA-specific tRNA nucleotidyltransferase; different forms targeted to the nucleus, cytosol, and mitochondrion are generated via the use of multiple transcriptional and translational start sites YER168C S000000970
YAL003W	-	-	0.0552277	EFB1	TEF5 Translation elongation factor 1 beta; stimulates nucleotide exchange to regenerate EF-1 alpha-GTP for the next elongation cycle; part of the EF-1 complex, which facilitates binding of aminoacyl-tRNA to the ribosomal A site YAL003W S000000003
YNL054W	-	-	0.0551778	VAC7	Integral vacuolar membrane protein involved in vacuole inheritance and morphology; activates Fab1p kinase activity under basal conditions and also after hyperosmotic shock Null mutant is viable but shows severely swollen vacuoles, figure-eight morphology, and slow growth at 24 degrees YNL054W S000004999
YHR182W	-	-	0.0538255		NO_MATCH
YLR153C	-	-	0.0508405	ACS2	Acetyl-coA synthetase isoform which, along with Acs1p, is the nuclear source of acetyl-coA for histone acetylation; mutants affect global transcription; required for growth on glucose; expressed under anaerobic conditions Null mutant is viable, and grows on ethanol or acetate as sole carbon source, but is unable to grow on glucose as sole carbon source; acs1 acs2 double null mutant is inviable YL…
YPR069C	-	-	0.0498494	SPE3	Spermidine synthase, involved in biosynthesis of spermidine and also in biosynthesis of pantothenic acid; spermidine is required for growth of wild-type cells Null mutant is viable, has no spermidine synthase activity, requires spermine or spermidine for growth YPR069C S000006273
YCR089W	-	-	0.047884	FIG2	Cell wall adhesin, expressed specifically during mating; may be involved in maintenance of cell wall integrity during mating Null mutant is viable, deficient in mating under non-optimal conditions YCR089W S000000685
YAR070C	-	-	0.047884		NO_MATCH
YMR295C	-	-	0.0471339		NO_MATCH
YIL017C	-	-	0.0465676	VID28	GID5|YIL017W Protein involved in proteasome-dependent catabolite degradation of fructose-1,6-bisphosphatase (FBPase); localized to the nucleus and the cytoplasm YIL017C S000001279
YDR133C	-	-	0.0460401		NO_MATCH
YGR258C	-	-	0.0449555	RAD2	Single-stranded DNA endonuclease, cleaves single-stranded DNA during nucleotide excision repair to excise damaged DNA; subunit of Nucleotide Excision Repair Factor 3 (NEF3); homolog of human XPG protein Null mutant is viable, radiation sensitive YGR258C S000003490
YDL046W	-	-	0.0449555	NPC2	Functional homolog of human NPC2/He1, which is a cholesterol-binding protein whose deficiency causes Niemann-Pick type C2 disease involving retention of cholesterol in lysosomes YDL046W S000002204
YDL217C	-	-	0.044924	TIM22	Component of the mitochondrial Tim54p-Tim22p complex involved in insertion of polytopic proteins into the inner membrane YDL217C S000002376
YDL195W	-	-	0.0446258	SEC31	WEB1 Essential phosphoprotein component (p150) of the COPII coat of secretory pathway vesicles, in complex with Sec13p; required for ER-derived transport vesicle formation YDL195W S000002354
YDR188W	-	-	0.0446062	CCT6	HTR3|TCP20|TCP6 Subunit of the cytosolic chaperonin Cct ring complex, related to Tcp1p, essential protein that is required for the assembly of actin and tubulins in vivo; contains an ATP-binding motif YDR188W S000002596
YGR037C	-	-	0.0445522	ACB1	Acyl-CoA-binding protein, transports newly synthesized acyl-CoA esters from fatty acid synthetase (Fas1p-Fas2p) to acyl-CoA-consuming processes Null mutant is viable, slightly reduced growth rate on ethanol YGR037C S000003269
YLR391W-A	-	-	0.0444955		NO_MATCH
YEAST GEN. DNA 0.1 MG/ML	-	-	0		NO_MATCH
YAR043C	-	-	0.0420545		NO_MATCH
YMR142C	-	-	0.0420545	RPL13B	Protein component of the large (60S) ribosomal subunit, nearly identical to Rpl13Ap; not essential for viability; has similarity to rat L13 ribosomal protein YMR142C S000004750
YGR026W	-	-	0.0413374		NO_MATCH
YJR105W	-	-	0.0406448	ADO1	Adenosine kinase, required for the utilization of S-adenosylmethionine (AdoMet); may be involved in recycling adenosine produced through the methyl cycle YJR105W S000003866
YOR302W	-	-	0.0400097		NO_MATCH
YLL021W	-	-	0.0391806	SPA2	FUS6|PEA1 Component of the polarisome, which functions in actin cytoskeletal organization during polarized growth; acts as a scaffold for Mkk1p and Mpk1p cell wall integrity signaling components; potential Cdc28p substrate impaired ability to form schmoos, do not mate well with other spa2 mutants YLL021W S000003944
YKL191W	-	-	0.0391806	DPH2	Protein required, along with Dph1p, Kti11p, Jjj3p, and Dph5p, for synthesis of diphthamide, which is a modified histidine residue of translation elongation factor 2 (Eft1p or Eft2p); may act in a complex with Dph1p and Kti11p YKL191W S000001674
YCR072C	-	-	0.0391806	RSA4	WD-repeat protein involved in ribosome biogenesis; may interact with ribosomes; required for maturation and efficient intra-nuclear transport or pre-60S ribosomal subunits, localizes to the nucleolus YCR072C S000000668
YLL019C	-	-	0.0389022	KNS1	L124 Nonessential putative protein kinase of unknown cellular role; member of the LAMMER family of protein kinases, which are serine/threonine kinases also capable of phosphorylating tyrosine residues YLL019C S000003942
NORF17	-	-	0.0385831		NO_MATCH
YDR542W	-	-	0.0383818	PAU10	Hypothetical protein YDR542W S000002950
YPR044C	-	-	0.0367268	OPI11	Dubious open reading frame unlikely to encode a protein, based on available experimental and comparative sequence data; partially overlaps verified gene RPL43A/YPR043W; deletion confers sensitivity to GSAO YPR044C S000006248
YFL038C	-	-	0.0363562	YPT1	YP2 Ras-like small GTPase, involved in the ER-to-Golgi step of the secretory pathway; complex formation with the Rab escort protein Mrs6p is required for prenylation of Ypt1p by protein geranylgeranyltransferase type II (Bet2p-Bet4p) Null mutant is inviable, at non-permissive temp, ts and cs mutants accumulate ER membranes and small vesicles, fail to process invertase and other secreted proteins,…
YPL066W	-	-	0.0363333		NO_MATCH
YKL033W-A	-	-	0.0363333		NO_MATCH
YGL010W	-	-	0.0358862		NO_MATCH
YBR104W	-	-	0.0337231	YMC2	Mitochondrial protein, putative inner membrane transporter with a role in oleate metabolism and glutamate biosynthesis; member of the mitochondrial carrier (MCF) family; has similarity with Ymc1p YBR104W S000000308
YIR039C	-	-	0.0335121	YPS6	Putative GPI-anchored aspartic protease YIR039C S000001478
YHR043C	-	-	0.0328969	DOG2	2-deoxyglucose-6-phosphate phosphatase, member of a family of low molecular weight phosphatases, similar to Dog1p, induced by oxidative and osmotic stress, confers 2-deoxyglucose resistance when overexpressed YHR043C S000001085
YBR218C	-	-	0.0325293	PYC2	Pyruvate carboxylase isoform, cytoplasmic enzyme that converts pyruvate to oxaloacetate; highly similar to isoform Pyc1p but differentially regulated; mutations in the human homolog are associated with lactic acidosis Null mutant is viable; pyc1 pyc2 double mutant is unable to grow on glucose as sole carbon source unless aspartate is added to the medium YBR218C S000000422
YMR127C	-	-	0.0318944	SAS2	Histone acetyltransferase (HAT) catalytic subunit of the SAS complex (Sas2p-Sas4p-Sas5p), which acetylates free histones and nucleosomes and regulates transcriptional silencing; member of the MYSTacetyltransferase family Null mutant is viable, suppresses temperature sensitive defects of orc2-1 and orc5-1; has opposite effects on HML and HMR YMR127C S000004734
YMR180C	-	-	0.03151	CTL1	CTH1 RNA 5'-triphosphatase, localizes to both the nucleus and cytoplasm Null mutant is viable at 15/30/37C, on media lacking inositol, and on media containing 15nM caffeine. CTL1 shows no genetic interaction with ceg1-250, cet1-4, nor CTD truncation mutants and does not suppress (in high copy) any of these mutants. YMR180C S000004792
YOL082W	-	-	0.0307167	ATG19	CVT19 Protein involved in the cytoplasm-to-vacuole targeting pathway and in autophagy, recognizes cargo proteins and delivers them to the preautophagosomal structure for eventual engulfment by the autophagosome and degradation Null: viable, unable to target vacuolar aminopeptidase I and to vacuoles, both under growing and nitrogen starvation conditions. YOL082W S000005442
YDR296W	-	-	0.0307167	MHR1	XTC1 Protein involved in homologous recombination in mitochondria and in transcription regulation in nucleus; binds to activation domains of acidic activators; required for recombination-dependent mtDNA partitioning Temperature sensitive in the maintenance of mitochondrial DNA YDR296W S000002704
YMR028W	-	-	0.0305253	TAP42	Essential protein involved in the TOR signaling pathway; physically associates with the protein phosphatase 2A and the SIT4 protein phosphatase catalytic subunits YMR028W S000004630
YPL267W	-	-	0.0290928	ACM1	Cell cycle regulated protein of unknown function; associated with Cdh1p and may supress the APC/C[Cdh1]-mediated proteolysis of mitotic cyclins YPL267W S000006188
YMR230W	-	-	0.028594	RPS10B	Protein component of the small (40S) ribosomal subunit; nearly identical to Rps10Ap and has similarity to rat ribosomal protein S10 YMR230W S000004843
YPL030W	-	-	0.0279465	TRM44	tRNA(Ser) Um(44) 2'-O-methyltransferase; conserved among metazoans and fungi but there does not appear to be a homolog in plants; green fluorescent protein (GFP)-fusion protein localizes to the cytoplasm; TRM44 is a non-essential gene YPL030W S000005951
YOL128C	-	-	0.0279465	YGK3	Protein kinase related to mammalian glycogen synthase kinases of the GSK-3 family; GSK-3 homologs (Mck1p, Rim11p, Mrk1p, Ygk3p) are involved in control of Msn2p-dependent transcription of stress responsive genes and in protein degradation YOL128C S000005488
YCR057C	-	-	0.0279465	PWP2	UTP1|YCR055C|YCR058C Conserved 90S pre-ribosomal component essential for proper endonucleolytic cleavage of the 35 S rRNA precursor at A0, A1, and A2 sites; contains eight WD-repeats; PWP2 deletion leads to defects in cell cycle and bud morphogenesis YCR057C S000000653
YHR033W	-	-	0.027937		NO_MATCH
YML002W	-	-	0.0278068		NO_MATCH
YOR176W	-	-	0.0275963	HEM15	Ferrochelatase, a mitochondrial inner membrane protein, catalyzes the insertion of ferrous iron into protoporphyrin IX, the eighth and final step in the heme biosynthetic pathway Null mutant is inviable in certain genetic backgrounds YOR176W S000005702
YGR011W	-	-	0.0261787		NO_MATCH
YJL003W	-	-	0.0260928	COX16	Mitochondrial inner membrane protein, required for assembly of cytochrome c oxidase Null: viable, respiration deficient YJL003W S000003540
YDR186C	-	-	0.0252372		NO_MATCH
YNR015W	-	-	0.0252012	SMM1	DUS2 Dihydrouridine synthase, member of a family of dihydrouridine synthases including Dus1p, Smm1p, Dus3p, and Dus4p; modifies uridine residues at position 20 of cytoplasmic tRNAs Overexpression weakly suppresses a mutation affecting the maturation of mitochondrial tRNA-Asp. YNR015W S000005298
YDR072C	-	-	0.0252012	IPT1	KTI6|SYR4 Inositolphosphotransferase 1, involved in synthesis of mannose-(inositol-P)2-ceramide (M(IP)2C), which is the most abundant sphingolipid in cells, mutation confers resistance to the antifungals syringomycin E and DmAMP1 in some growth media Null mutant is viable but cannot synthesize M(IP)2C, instead accumulates the precursor, mannose-inositol-P-ceramide, and is slightly resistant to ca…
YBL005W-A	-	-	0.0242412		NO_MATCH
YLR270W	-	-	0.0219311	DCS1	DcpS Non-essential hydrolase involved in mRNA decapping, may function in a feedback mechanism to regulate deadenylation, contains pyrophosphatase activity and a HIT (histidine triad) motif; interacts with neutral trehalase Nth1p YLR270W S000004260
YHR198C	-	-	0.0212026	AIM18	FMP22 Putative protein of unknown function; the authentic, non-tagged protein is detected in highly purified mitochondria in high-throughput studies; null mutant displays increased frequency of mitochondrial genome loss (petite formation) YHR198C S000001241
YOR115C	-	-	0.0197836	TRS33	One of 10 subunits of the transport protein particle (TRAPP) complex of the cis-Golgi which mediates vesicle docking and fusion; involved in endoplasmic reticulum (ER) to Golgi membrane traffic YOR115C S000005641
YCL044C	-	-	0.0197836	MGR1	Subunit, with Yme1p, of the mitochondrial inner membrane i-AAA protease complex, which is responsible for degradation of unfolded or misfolded mitochondrial gene products; required for growth of cells lacking the mitochondrial genome YCL044C S000000549
YDL247W	-	-	0.0197836	MPH2	Alpha-glucoside permease, transports maltose, maltotriose, alpha-methylglucoside, and turanose; identical to Mph3p; encoded in a subtelomeric position in a region likely to have undergone duplication YDL247W S000002406
YDR469W	-	-	0.0190467	SDC1	CPS25|SAF19 Subunit of the COMPASS (Set1C) complex, which methylates histone H3 on lysine 4 and is required in transcriptional silencing near telomeres; has similarity to C. elegans Dpy-30 Null: defective in silencing of expression of genes located near telomeres; hydroxyurea sensitive. YDR469W S000002877
YJL081C	-	-	0.0171105	ARP4	ACT3 Nuclear actin-related protein involved in chromatin remodeling, component of chromatin-remodeling enzyme complexes YJL081C S000003617
YJL041W	-	-	0.0167787	NSP1	Essential component of the nuclear pore complex, which mediates nuclear import and export YJL041W S000003577
YGL087C	-	-	0.0138497	MMS2	Protein involved in error-free postreplication DNA repair; forms a heteromeric complex with Ubc13p that has a ubiquitin-conjugating activity; cooperates with chromatin-associated RING finger proteins, Rad18p and Rad5p Null mutant is viable and is sensitive to MMS and UV YGL087C S000003055
YPR204W	-	-	0.0135171		NO_MATCH
YKL218C	-	-	0.0133935	SRY1	3-hydroxyaspartate dehydratase, deaminates L-threo-3-hydroxyaspartate to form oxaloacetate and ammonia; required for survival in the presence of hydroxyaspartate YKL218C S000001701
YJL143W	-	-	0.0132232	TIM17	MIM17|MPI2|SMS1 Essential constituent of the mitochondrial inner membrane presequence translocase; interacts with Pam18p to recruit the presequence translocase-associated motor (PAM complex) and also required for protein sorting during import YJL143W S000003679
YDR031W	-	-	0.0119662	MIC14	Mitochondrial intermembrane space cysteine motif protein of 14 kDa YDR031W S000002438
YDR096W	-	-	0.0118605	GIS1	JmjC domain-containing histone demethylase; transcription factor involved in the expression of genes during nutrient limitation; also involved in the negative regulation of DPP1 and PHR1 Null mutant is viable and shows enhanced basal level expression of PHR1 YDR096W S000002503
YOL107W	-	-	0.011834		NO_MATCH
YNL330C	-	-	0.011834	RPD3	MOF6|REC3|SDI2|SDS6 Histone deacetylase; regulates transcription and silencing; plays a role in regulating Ty1 transposition Null mutant is viable and shows reduced potassium dependency, mating defects, hypersensitivity to cycloheximide, and constitutive derepression of acid phosphatase; mutant epistasis analysis indicates that RPD3 acts in the same pathway as UME4/SIN3; homozygous mutant diploid…
YNL217W	-	-	0.011834		NO_MATCH
YMR122C	-	-	0.011834		NO_MATCH
YJL208C	-	-	0.011834	NUC1	Major mitochondrial nuclease, has RNAse and DNA endo- and exonucleolytic activities; has roles in mitochondrial recombination, apoptosis and maintenance of polyploidy YJL208C S000003744
YDR414C	-	-	0.011834	ERD1	LDB2 Predicted membrane protein required for the retention of lumenal endoplasmic reticulum proteins; mutants secrete the endogenous ER protein, BiP (Kar2p) disruption of the retention system for ER proteins; defects in the Golgi-dependent modification of glycoproteins|exhibits defects in N-glycosylation of proteins YDR414C S000002822
YBR034C	-	-	0.011834	HMT1	HCP1|ODP1|RMT1 Nuclear SAM-dependent mono- and asymmetric arginine dimethylating methyltransferase that modifies hnRNPs, including Npl3p and Hrp1p, thus facilitating nuclear export of these proteins; required for viability of npl3 mutants Null mutant is viable, hmt1 npl3-1 mutants are inviable YBR034C S000000238
YJL158C	-	-	0.0104947	CIS3	CCW11|CCW5|PIR4 Mannose-containing glycoprotein constituent of the cell wall; member of the PIR (proteins with internal repeats) family Null mutant is viable; CIS3 is a high copy suppressor of cik1 deletion mutants YJL158C S000003694
YGL143C	-	-	0.0103699	MRF1	Mitochondrial translation release factor, involved in stop codon recognition and hydrolysis of the peptidyl-tRNA bond during mitochondrial translation; lack of MRF1 causes mitochondrial genome instability Null mutant is viable but shows high instability of the mitochondrial genome, reduced synthesis of mitochondrial translation products, and respiratory deficiency YGL143C S000003111
YOR375C	-	-	0.0101388	GDH1	GDH-A|GDHA|URE1 NADP(+)-dependent glutamate dehydrogenase, synthesizes glutamate from ammonia and alpha-ketoglutarate; rate of alpha-ketoglutarate utilization differs from Gdh3p; expression regulated by nitrogen and carbon sources YOR375C S000005902
YER090W	-	-	0.00986143	TRP2	Anthranilate synthase, catalyzes the initial step of tryptophan biosynthesis, forms multifunctional hetero-oligomeric anthranilate synthase:indole-3-glycerol phosphate synthase enzyme complex with Trp3p tryptophan requiring YER090W S000000892
YML043C	-	-	0.00922974	RRN11	Protein required for rDNA transcription by RNA polymerase I, component of the core factor (CF) of rDNA transcription factor, which also contains Rrn6p and Rrn7p YML043C S000004507
YIL067C	-	-	0.00922974		NO_MATCH
YER058W	-	-	0.00922974	PET117	Protein required for assembly of cytochrome c oxidase petite; unable to grow on non-fermentable carbon sources YER058W S000000860
YLR286C	-	-	0.00801407	CTS1	Endochitinase, required for cell separation after mitosis; transcriptional activation during late G and early M cell cycle phases is mediated by transcription factor Ace2p YLR286C S000004276
YPR109W	-	-	0.00796394		NO_MATCH
YMR266W	-	-	0.00561644	RSN1	Membrane protein of unknown function; overexpression suppresses NaCl sensitivity of sro7 mutant Null: viable in both high and low salinity YMR266W S000004879
YLR399C	-	-	0.00416141	BDF1	Protein involved in transcription initiation at TATA-containing promoters; associates with the basal transcription factor TFIID; contains two bromodomains; corresponds to the C-terminal region of mammalian TAF1; redundant with Bdf2p Null mutant is viable; defect in sporulation and spore formation, reduced rate of vegetative growth, sensitivity to a DNA-damaging agent, defective in snRNA productio…
YOR198C	-	-	0.00408766	BFR1	Component of mRNP complexes associated with polyribosomes; implicated in secretion and nuclear segregation; multicopy suppressor of BFA (Brefeldin A) sensitivity YOR198C S000005724
YCRX13W	-	-	0.00408766		NO_MATCH
YGL097W	-	-	0.00408766	SRM1	MTR1|PRP20 Nucleotide exchange factor for Gsp1p, localizes to the nucleus, required for nucleocytoplasmic trafficking of macromolecules; suppressor of the pheromone response pathway; potentially phosphorylated by Cdc28p recessive mutation activates signal transduction pathway required for mating; leads to arrest in G1. mutant phenotype reveals defect in plasmid and chromosome stability, suggestin…
YJL096W	-	-	0.0036271	MRPL49	Mitochondrial ribosomal protein of the large subunit YJL096W S000003632
YCR094W	-	-	0.00337042	CDC50	Endosomal protein that regulates cell polarity, controls polarized growth; similar to Ynr048wp and Lem3p Null mutant is cold-sensitive and sensitive to MMS and HU YCR094W S000000690
YHR078W	-	-	0.00334839		NO_MATCH
YBR004C	-	-	0.00154913	GPI18	FMP44 Functional ortholog of human PIG-V, which is a mannosyltransferase that transfers the second mannose in glycosylphosphatidylinositol biosynthesis; the authentic, non-tagged protein was localized to mitochondria YBR004C S000000208
YML045	-	-	0		NO_MATCH
YML010W-B	-	-	0		NO_MATCH
YLR391W	-	-	0		NO_MATCH
YLR162W-	-	-	0		NO_MATCH
YLR162W	-	-	0		NO_MATCH
YIL017W	-	-	0		NO_MATCH
YHR079BC	-	-	0		NO_MATCH
YHR039BC	-	+	0		NO_MATCH
YGL168W	-	-	0	HUR1	Protein of unknown function; reported null mutant phenotype of hydroxyurea sensitivity may be due to effects on overlapping PMR1 gene Null mutant is viable but sensitive to HU YGL168W S000003136
YFL069-TYB	-	-	0		NO_MATCH
YFL069-TYA	-	-	0		NO_MATCH
YFL035C-B	-	-	0		NO_MATCH
YFL018W-A	-	-	0		NO_MATCH
YET_SRRNA	-	-	0		NO_MATCH
YEAST_GENOMIC_DNA_0.20UG/UL	-	-	0		NO_MATCH
YEAST_GEN._DNA_0.1_MG/ML	-	-	0		NO_MATCH
YDL134C-A	-	-	0		NO_MATCH
YCRX21C	-	-	0		NO_MATCH
YCRX19W	-	-	0		NO_MATCH
YCRX18C	-	-	0		NO_MATCH
YCRX17W	-	-	0		NO_MATCH
YCRX16C	-	-	0		NO_MATCH
YCRX15W	-	-	0		NO_MATCH
YCRX14W	-	-	0		NO_MATCH
YCRX12W	-	-	0		NO_MATCH
YCRX11W	-	-	0		NO_MATCH
YCRX10W	-	-	0		NO_MATCH
YCRX09C	-	-	0		NO_MATCH
YCRX07W	-	-	0		NO_MATCH
YCRX06W	-	-	0		NO_MATCH
YCRX05W	-	-	0		NO_MATCH
YCRX04W	-	-	0		NO_MATCH
YCRX03C	-	-	0		NO_MATCH
YCRX02C	-	-	0		NO_MATCH
YCR102W-A	-	-	0		NO_MATCH
YCR097WB	-	-	0		NO_MATCH
YCR097WA	-	-	0		NO_MATCH
YCR080W	-	-	0		NO_MATCH
YCR074C	-	-	0		NO_MATCH
YCR070W	-	-	0		NO_MATCH
YCR058C	-	-	0		NO_MATCH
YCR056W	-	-	0		NO_MATCH
YCR055C	-	-	0		NO_MATCH
YCR029C-A	-	-	0		NO_MATCH
YCR029C	-	-	0		NO_MATCH
YCLX12W	-	-	0		NO_MATCH
YCLX10C	-	-	0		NO_MATCH
YCLX07W	-	-	0		NO_MATCH
YCLX06C	-	-	0		NO_MATCH
YCLX05C	-	-	0		NO_MATCH
YCLX04W	-	-	0		NO_MATCH
YCLX03C	-	-	0		NO_MATCH
YCLX02C	-	-	0		NO_MATCH
YCLX01W	-	-	0		NO_MATCH
YCL062W	-	-	0		NO_MATCH
YCL060C	-	-	0		NO_MATCH
YCL053C	-	-	0		NO_MATCH
YCL026C	-	-	0		NO_MATCH
YCL021W	-	-	0		NO_MATCH
YCL013W	-	-	0		NO_MATCH
YAR052C	-	-	0		NO_MATCH
YAR040C	-	-	0		NO_MATCH
YAR037W	-	-	0		NO_MATCH
YAR002AC	-	-	0		NO_MATCH
YAL065C-A	-	-	0		NO_MATCH
NORF9	-	-	0		NO_MATCH
NORF8	-	-	0		NO_MATCH
NORF7	-	-	0		NO_MATCH
NORF6	-	-	0		NO_MATCH
NORF5	-	-	0		NO_MATCH
NORF4	-	-	0		NO_MATCH
NORF30	-	-	0		NO_MATCH
NORF3	-	-	0		NO_MATCH
NORF29	-	-	0		NO_MATCH
NORF28	-	-	0		NO_MATCH
NORF27	-	-	0		NO_MATCH
NORF26	-	-	0		NO_MATCH
NORF25	-	-	0		NO_MATCH
NORF24	-	-	0		NO_MATCH
NORF23	-	-	0		NO_MATCH
NORF22	-	-	0		NO_MATCH
NORF21	-	-	0		NO_MATCH
NORF2	-	-	0		NO_MATCH
NORF19	-	-	0		NO_MATCH
NORF18	-	-	0		NO_MATCH
NORF16	-	-	0		NO_MATCH
NORF15	-	-	0		NO_MATCH
NORF14	-	-	0		NO_MATCH
NORF13	-	-	0		NO_MATCH
NORF12	-	-	0		NO_MATCH
NORF11	-	-	0		NO_MATCH
NORF1	-	-	0		NO_MATCH
YIR031C	-	-	-0.000146681	DAL7	MLS2|MSL2 Malate synthase, role in allantoin degradation unknown; expression sensitive to nitrogen catabolite repression and induced by allophanate, an intermediate in allantoin degradation YIR031C S000001470
YPL270W	-	-	-0.000184029	MDL2	Mitochondrial inner membrane half-type ATP-binding cassette (ABC) transporter YPL270W S000006191
YLR024C	-	-	-0.00096817	UBR2	Cytoplasmic ubiquitin-protein ligase (E3) YLR024C S000004014
YHR003C	-	-	-0.00096817		NO_MATCH
YDR507C	-	-	-0.00096817	GIN4	ERC47 Protein kinase involved in bud growth and assembly of the septin ring, proposed to have kinase-dependent and kinase-independent activities; undergoes autophosphorylation; similar to Kcc4p and Hsl1p Null mutant is viable, exhibits a mild elongated bud phenotype and some cell clumping YDR507C S000002915
YIL133C	-	-	-0.0010782	RPL16A	RPL13 N-terminally acetylated protein component of the large (60S) ribosomal subunit, binds to 5.8 S rRNA; has similarity to Rpl16Bp, E. coli L13 and rat L13a ribosomal proteins; transcriptionally regulated by Rap1p YIL133C S000001395
YKL223W	-	-	-0.00293906		NO_MATCH
YNL290W	-	-	-0.00332726	RFC3	Subunit of heteropentameric Replication factor C (RF-C), which is a DNA binding protein and ATPase that acts as a clamp loader of the proliferating cell nuclear antigen (PCNA) processivity factor for DNA polymerases delta and epsilon YNL290W S000005234
YKL009W	-	-	-0.00441086	MRT4	Protein involved in mRNA turnover and ribosome assembly, localizes to the nucleolus Null mutant exhibits slow growth. ts mutation results in decreased decay rates of mRNAs YKL009W S000001492
YDR404C	-	-	-0.00479988	RPB7	RNA polymerase II subunit B16; forms two subunit dissociable complex with Rpb4p YDR404C S000002812
YOR208W	-	-	-0.00527133	PTP2	Phosphotyrosine-specific protein phosphatase involved in the inactivation of mitogen-activated protein kinase (MAPK) during osmolarity sensing; dephosporylates Hog1p MAPK and regulates its localization; localized to the nucleus Null mutant is viable, grows slowly, is hypersensitive to heat; ptp2 ptc1 mutants exhibit synthetic lethality YOR208W S000005734
YOR034C	-	-	-0.00594034	AKR2	Ankyrin repeat-containing protein similar to Akr1p; member of a family of putative palmitoyltransferases containing an Asp-His-His-Cys-cysteine rich (DHHC-CRD) domain; possibly involved in constitutive endocytosis of Ste3p YOR034C S000005560
YJL136C	-	-	-0.00780492	RPS21B	Protein component of the small (40S) ribosomal subunit; nearly identical to Rps21Ap and has similarity to rat S21 ribosomal protein YJL136C S000003672
YPL240C	-	-	-0.00839583	HSP82	HSP90 Hsp90 chaperone required for pheromone signaling and negative regulation of Hsf1p; docks with Tom70p for mitochondrial preprotein delivery; promotes telomerase DNA binding and nucleotide addition; interacts with Cns1p, Cpr6p, Cpr7p, Sti1p Null mutant is viable at 25 degrees C; ability to grow at higher temperatures varies with gene copy number YPL240C S000006161
YHR127W	-	-	-0.00839583		NO_MATCH
YGR153W	-	-	-0.0105054		NO_MATCH
YOR362C	-	-	-0.0108313	PRE10	Alpha 7 subunit of the 20S proteasome YOR362C S000005889
YOL034W	-	-	-0.0108313	SMC5	Structural maintenance of chromosomes (SMC) protein; essential subunit of the Mms21-Smc5-Smc6 complex; required for growth and DNA repair; S. pombe homolog forms a heterodimer with S. pombe Rad18p that is involved in DNA repair YOL034W S000005394
YLR401C	-	-	-0.0108313	DUS3	Dihydrouridine synthase, member of a widespread family of conserved proteins including Smm1p, Dus1p, and Dus4p; contains a consensus oleate response element (ORE) in its promoter region YLR401C S000004393
YLR324W	-	-	-0.0108313	PEX30	Peroxisomal integral membrane protein, involved in negative regulation of peroxisome number; partially functionally redundant with Pex31p; genetic interactions suggest action at a step downstream of steps mediated by Pex28p and Pex29p YLR324W S000004316
YDR394W	-	-	-0.0108313	RPT3	YNT1|YTA2 One of six ATPases of the 19S regulatory particle of the 26S proteasome involved in the degradation of ubiquitinated substrates; substrate of N-acetyltransferase B Null mutant is inviable; yta2 is an extragenic suppressor of yme1 mutations YDR394W S000002802
YDL107W	-	-	-0.0108557	MSS2	Peripherally bound inner membrane protein of the mitochondrial matrix involved in membrane insertion of C-terminus of Cox2p, interacts genetically and physically with Cox18p Suppression of a mitochondrial RNA splice defect; COX1 pre-mRNA processing factor YDL107W S000002265
YIL014W	-	-	-0.0115114	MNT3	Alpha-1,3-mannosyltransferase, adds the fourth and fifth alpha-1,3-linked mannose residues to O-linked glycans during protein O-glycosylation YIL014W S000001276
YKL169C	-	-	-0.0118255		NO_MATCH
YNL075W	-	-	-0.0132471	IMP4	Component of the SSU processome, which is required for pre-18S rRNA processing; interacts with Mpp10p; member of a superfamily of proteins that contain a sigma(70)-like motif and associate with RNAs YNL075W S000005019
YML124C	-	-	-0.0132471	TUB3	Alpha-tubulin; associates with beta-tubulin (Tub2p) to form tubulin dimer, which polymerizes to form microtubules; expressed at lower level than Tub1p Null mutant is viable, hypersensitive to benomyl, exhibits poor spore viability YML124C S000004593
YLR364W	-	-	-0.0132471	GRX8	Putative cytosolic dithiol glutaredoxin; green fluorescent protein (GFP)-fusion protein localizes to the cytoplasm; non-essential gene that is strongly induced by arsenic YLR364W S000004356
YLR023C	-	+	-0.013553	IZH3	Membrane protein involved in zinc metabolism, member of the four-protein IZH family, expression induced by zinc deficiency; deletion reduces sensitivity to elevated zinc and shortens lag phase, overexpression reduces Zap1p activity YLR023C S000004013
YML125C	-	-	-0.0147729	PGA3	Essential protein required for maturation of Gas1p and Pho8p, protein trafficking; GFP-fusion protein localizes to the endoplasmic reticulum; null mutants have a cell separation defect YML125C S000004594
YBL056W	-	-	-0.0152275	PTC3	Type 2C protein phosphatase; dephosphorylates Hog1p (see also Ptc2p) to limit maximal kinase activity induced by osmotic stress; dephosphorylates T169 phosphorylated Cdc28p (see also Ptc2p); role in DNA checkpoint inactivation YBL056W S000000152
YNL019C	-	-	-0.0156435		NO_MATCH
YLR093C	-	-	-0.0166598	NYV1	MAM2 v-SNARE component of the vacuolar SNARE complex involved in vesicle fusion; inhibits ATP-dependent Ca(2+) transport activity of Pmc1p in the vacuolar membrane YLR093C S000004083
YFL004W	-	-	-0.0172021	VTC2	PHM1 Vacuolar membrane protein involved in vacuolar polyphosphate accumulation; functions as a regulator of vacuolar H+-ATPase activity and vacuolar transporter chaperones; involved in protein localization and non-autophagic vacuolar fusion Null nutant is viable; no polyphosphate accumulation in a vtc2(phm1)/vtc3(phm2) double disruptant YFL004W S000001890
YGL006W	-	+	-0.0172383	PMC1	Vacuolar Ca2+ ATPase involved in depleting cytosol of Ca2+ ions; prevents growth inhibition by activation of calcineurin in the presence of elevated concentrations of calcium; similar to mammalian PMCA1a Null mutant is viable but fails to grow in high Ca2+ medium; this death in high calcium is suppressed by mutations in calcineurin (CNA1, CNA2, CNB1) and calmodulin (CMD1); pmc1 vcx1 double mutant…
YOL124C	-	-	-0.0180207	TRM11	Catalytic subunit of an adoMet-dependent tRNA methyltransferase complex (Trm11p-Trm112p), required for the methylation of the guanosine nucleotide at position 10 (m2G10) in tRNAs; contains a THUMP domain and a methyltransferase domain YOL124C S000005484
YJR133W	-	-	-0.0181412	XPT1	Xanthine-guanine phosphoribosyl transferase, required for xanthine utilization and for optimal utilization of guanine Cannot utilize xanthine as a source of GMP YJR133W S000003894
YER095W	-	-	-0.0182339	RAD51	MUT5 Strand exchange protein, forms a helical filament with DNA that searches for homology; involved in the recombinational repair of double-strand breaks in DNA during vegetative growth and meiosis; homolog of Dmc1p and bacterial RecA protein Null mutant is viable; accumulates meiosis-specific double strand breaks at a recombination hotspot and reduces the formation of physical recombinants and …
YIL174W	-	-	-0.0191027		NO_MATCH
YMR217W	-	-	-0.0203791	GUA1	GMP synthase, an enzyme that catalyzes the second step in the biosynthesis of GMP from inosine 5'-phosphate (IMP); transcription is not subject to regulation by guanine but is negatively regulated by nutrient starvation Null mutant is viable but is a guanine auxotroph YMR217W S000004830
YAL014C	-	-	-0.0203791	SYN8	SLT2|UIP2 Endosomal SNARE related to mammalian syntaxin 8 YAL014C S000000012
YOR312C	-	-	-0.0215458	RPL20B	RPL18A1 Protein component of the large (60S) ribosomal subunit, nearly identical to Rpl20Ap and has similarity to rat L18a ribosomal protein YOR312C S000005839
YPR165W	-	-	-0.0227188	RHO1	GTP-binding protein of the rho subfamily of Ras-like proteins, involved in establishment of cell polarity; regulates protein kinase C (Pkc1p) and the cell wall synthesizing enzyme 1,3-beta-glucan synthase (Fks1p and Gsc2p) null is inviable; synthetic lethal with bem2 YPR165W S000006369
YEL060C	-	-	-0.0227188	PRB1	CVT1 Vacuolar proteinase B (yscB), a serine protease of the subtilisin family; involved in protein degradation in the vacuole and required for full protein degradation during sporulation Null mutant is viable, protease B deficient, has smaller spores than wild-type embedded in a thick matrix YEL060C S000000786
YCR087C-A	-	-	-0.0227188	LUG1	Putative protein of unknown function; green fluorescent protein (GFP)-fusion protein localizes to the nucleolus; YCR087C-A is not an essential gene YCR087C-A S000007223
YNL087W	-	-	-0.0235662	TCB2	Bud-specific protein with a potential role in membrane trafficking; GFP-fusion protein migrates from the cell surface to intracellular vesicles near vacuole; contains 3 calcium and lipid binding domains; mRNA is targeted to the bud YNL087W S000005031
YIL051C	-	-	-0.0242274	MMF1	IBM1 Mitochondrial protein involved in maintenance of the mitochondrial genome Null mutant is viable but cannot utilize glycerol as a carbon source; the mitochondrial DNA is deleted and the number of mitochondria is reduced in the null mutant YIL051C S000001313
YDR273W	-	-	-0.0245025	DON1	Meiosis-specific component of the spindle pole body, part of the leading edge protein (LEP) coat, forms a ring-like structure at the leading edge of the prospore membrane during meiosis II YDR273W S000002681
YDR068W	-	-	-0.0246276	DOS2	Protein of unknown function, green fluorescent protein (GFP)-fusion protein localizes to the cytoplasm YDR068W S000002475
YGR002C	-	-	-0.0250402	SWC4	EAF2|GOD1 Component of the Swr1p complex that incorporates Htz1p into chromatin; component of the NuA4 histone acetyltransferase complex YGR002C S000003234
YCR049C	-	-	-0.0250402		NO_MATCH
YMR146C	-	-	-0.025084	TIF34	Subunit of the core complex of translation initiation factor 3(eIF3), which is essential for translation YMR146C S000004754
YDR192C	-	-	-0.0273436	NUP42	RIP1|UIP1 Subunit of the nuclear pore complex (NPC) that localizes exclusively to the cytoplasmic side; involved in RNA export, most likely at a terminal step; interacts with Gle1p Null mutant is viable, NUP42 is essential for the export of heat shock mRNAs following stress YDR192C S000002600
YML078W	-	-	-0.0273436	CPR3	CYP3 Mitochondrial peptidyl-prolyl cis-trans isomerase (cyclophilin), catalyzes the cis-trans isomerization of peptide bonds N-terminal to proline residues; involved in protein refolding after import into mitochondria Null mutant is viable, unable to grow on L-lactate at 37 degrees C YML078W S000004543
YHR099W	-	-	-0.0273436	TRA1	Subunit of SAGA and NuA4 histone acetyltransferase complexes; interacts with acidic activators (e.g., Gal4p) which leads to transcription activation; similar to human TRRAP, which is a cofactor for c-Myc mediated oncogenic transformation YHR099W S000001141
YOR157C	-	-	-0.0273786	PUP1	Endopeptidase with trypsin-like activity that cleaves after basic residues; beta 2 subunit of 20S proteasome, synthesized as a proprotein before being proteolytically processed for assembly into 20S particle; human homolog is subunit Z YOR157C S000005683
YGL145W	-	-	-0.0290919	TIP20	TIP1 Peripheral membrane protein required for fusion of COPI vesicles with the ER, prohibits back-fusion of COPII vesicles with the ER, may act as a sensor for vesicles at the ER membrane; interacts with Sec20p YGL145W S000003113
YDR044W	-	-	-0.0294652	HEM13	Coproporphyrinogen III oxidase, an oxygen requiring enzyme that catalyzes the sixth step in the heme biosynthetic pathway; localizes to the mitochondrial inner membrane; transcription is repressed by oxygen and heme (via Rox1p and Hap1p) YDR044W S000002451
YJR162C	-	-	-0.0296291		NO_MATCH
YJR072C	-	-	-0.0296291	NPA3	EPA1 Essential, conserved, cytoplasmic ATPase; phosphorylated by the Pcl1p-Pho85p kinase complex YJR072C S000003833
YAL016W	-	-	-0.0336262	TPD3	FUN32 Regulatory subunit A of the heterotrimeric protein phosphatase 2A, which also contains regulatory subunit Cdc55p and either catalytic subunit Pph21p or Pph22p; required for cell morphogenesis and for transcription by RNA polymerase III Null mutant is viable, defective in cytokinesis at reduced temperatures, defective in transcription by RNA polymerase III at elevated temperatures; nocodazol…
YFL012W	-	-	-0.0341476		NO_MATCH
YLR103C	-	-	-0.0344761	CDC45	SLD4 DNA replication initiation factor; recruited to MCM pre-RC complexes at replication origins; promotes release of MCM from Mcm10p, recruits elongation machinery; mutants in human homolog may cause velocardiofacial and DiGeorge syndromes required for minichromosome maintenance and chromosomal DNA replication YLR103C S000004093
YBR264C	-	-	-0.0363811	YPT10	GTP binding protein that contains the PEST signal sequence specific for proteolytic enzymes; may be involved in vesicular transport; overexpression leads to accumulation of Golgi-like cisternae with budding vesicles YBR264C S000000468
YER023W	-	-	-0.0381027	PRO3	ORE2 Delta 1-pyrroline-5-carboxylate reductase, catalyzes the last step in proline biosynthesis proline requiring YER023W S000000825
YML086C	-	-	-0.0385977	ALO1	D-Arabinono-1,4-lactone oxidase, catalyzes the final step in biosynthesis of D-erythroascorbic acid, which is protective against oxidative stress Null mutant is viable, shows increased sensitivity towards oxidative stress YML086C S000004551
YJR138W	-	-	-0.0385977	IML1	Protein of unknown function, green fluorescent protein (GFP)-fusion protein localizes to the vacuolar membrane YJR138W S000003899
YHR143W-A	-	-	-0.0385977	RPC10	RPB12 RNA polymerase subunit, found in RNA polymerase complexes I, II, and III YHR143W-A S000001185
YER017C	-	-	-0.0385977	AFG3	YTA10 Component, with Yta12p, of the mitochondrial inner membrane m-AAA protease that mediates degradation of misfolded or unassembled proteins and is also required for correct assembly of mitochondrial enzyme complexes nuclear petite phenotype; loss of repspiratory competence YER017C S000000819
YKL134C	-	+	-0.0386695	2008-10-01	Mitochondrial intermediate peptidase, cleaves N-terminal residues of a subset of proteins upon import, after their cleavage by mitochondrial processing peptidase (Mas1p-Mas2p); may contribute to mitochondrial iron homeostasis Null mutant is viable, unable to grow on nonfermentable substrates YKL134C S000001617
YNL336W	-	-	-0.0394923	COS1	Protein of unknown function, member of the DUP380 subfamily of conserved, often subtelomerically-encoded proteins YNL336W S000005280
YPR145W	-	-	-0.0401974	ASN1	Asparagine synthetase, isozyme of Asn2p; catalyzes the synthesis of L-asparagine from L-aspartate in the asparagine biosynthetic pathway Null mutant is viable; L-asparagine auxotrophy occurs upon mutation of both ASN1 and ASN2 YPR145W S000006349
YDR371W	-	-	-0.0403681	CTS2	Sporulation-specific chitinase Null mutant fails to form mature asci, synthesis of spore wall surface layers is affected. YDR371W S000002779
YNL334C	-	-	-0.0407977	SNO2	Protein of unknown function, nearly identical to Sno3p; expression is induced before the diauxic shift and also in the absence of thiamin YNL334C S000005278
YDR537C	-	-	-0.0407977		NO_MATCH
YNL332W	-	-	-0.0407977	THI12	Protein involved in synthesis of the thiamine precursor hydroxymethylpyrimidine (HMP); member of a subtelomeric gene family including THI5, THI11, THI12, and THI13 YNL332W S000005276
YJL091C	-	-	-0.0410969	GWT1	Protein involved in the inositol acylation of glucosaminyl phosphatidylinositol (GlcN-PI) to form glucosaminyl(acyl)phosphatidylinositol (GlcN(acyl)PI), an intermediate in the biosynthesis of glycosylphosphatidylinositol (GPI) anchors overexpression confers 1-[4-butylbenzyl]isoquinoline (BIQ)-resistant growth in S. cerevisiae. YJL091C S000003627
YLR121C	-	-	-0.0414684	YPS3	YPS4 Aspartic protease, attached to the plasma membrane via a glycosylphosphatidylinositol (GPI) anchor YLR121C S000004111
YFL020C	-	-	-0.0417266	PAU5	Part of 23-member seripauperin multigene family encoded mainly in subtelomeric regions, active during alcoholic fermentation, regulated by anaerobiosis, negatively regulated by oxygen, repressed by heme YFL020C S000001874
YGR295C	-	-	-0.0418176	COS6	Protein of unknown function, member of the DUP380 subfamily of conserved, often subtelomerically-encoded proteins YGR295C S000003527
YOR116C	-	-	-0.0429812	RPO31	RPC1|RPC160 RNA polymerase III subunit C160, part of core enzyme; similar to bacterial beta-prime subunit YOR116C S000005642
YDR030C	-	-	-0.0429812	RAD28	Protein involved in DNA repair, related to the human CSA protein that is involved in transcription-coupled repair nucleotide excision repair Null mutant is viable but is hypermutable following exposure to UV light and is slightly more sensitive to UV light in the presence of mutations in rad7 or rad16 YDR030C S000002437
YLR272C	-	-	-0.0446908	YCS4	LOC7 Non-SMC subunit of the condensin complex (Smc2p-Smc4p-Ycs4p-Brn1p-Ycg1p); required for establishment and maintenance of chromosome condensation, chromosome segregation, chromatin binding of condensin and silencing at the mating type locus Null mutant is viable but exhibits defects in sister chromatid separation and segregation. YLR272C S000004262
YDR223W	-	-	-0.0447504	CRF1	Transcriptional corepressor involved in the regulation of ribosomal protein gene transcription via the TOR signaling pathway and protein kinase A, phosphorylated by activated Yak1p which promotes accumulation of Crf1p in the nucleus YDR223W S000002631
YJR088C	-	-	-0.0453427		NO_MATCH
YFL059W	-	-	-0.0469542	SNZ3	Member of a stationary phase-induced gene family; transcription of SNZ2 is induced prior to diauxic shift, and also in the absence of thiamin in a Thi2p-dependent manner; forms a coregulated gene pair with SNO3 hypersporulation YFL059W S000001835
YIL041W	-	-	-0.0472999	GVP36	Golgi vesicle protein of unknown function; localizes to both early and late Golgi vesicles; may interact with ribosomes, based on co-purification experiments Null: no notable phenotype YIL041W S000001303
YPL126W	-	-	-0.0472999	NAN1	UTP17 U3 snoRNP protein, component of the small (ribosomal) subunit (SSU) processosome containing U3 snoRNA; required for the biogenesis of18S rRNA YPL126W S000006047
YIL096C	-	-	-0.0472999		NO_MATCH
YGR281W	-	-	-0.0472999	YOR1	YRS1 Plasma membrane ATP-binding cassette (ABC) transporter, multidrug transporter mediates export of many different organic anions including oligomycin Null mutant is viable but exhibits a slight growth defect; null mutant is hypersensitive to reveromycin A and fumonisin B1. Overexpression increases resistance to fumonisin B, sphingosine, and reveromycin A. YGR281W S000003513
YLR079W	-	-	-0.0473054	SIC1	SDB25 Inhibitor of Cdc28-Clb kinase complexes that controls G1/S phase transition, preventing premature S phase and ensuring genomic integrity; phosphorylation targets Sic1p for SCF(CDC4)-dependent turnover; functional homolog of mammalian Kip1 Null mutant is viable, shows increased frequency of broken and lost chromosomes; sic1 deletion mutant rescues lethality of cln1 cln2 cln3 triple mutant. Y…
YHR123W	-	-	-0.0477321	EPT1	sn-1,2-diacylglycerol ethanolamine- and cholinephosphotranferase; not essential for viability YHR123W S000001165
YMR244C-A	-	-	-0.0481176		NO_MATCH
YGR191W	-	-	-0.0494355	HIP1	High-affinity histidine permease, also involved in the transport of manganese ions requires supplementation with large amounts of histidine for growth YGR191W S000003423
YDR231C	-	-	-0.0494355	COX20	Mitochondrial inner membrane protein, required for proteolytic processing of Cox2p and its assembly into cytochrome c oxidase Null mutant is respiratory-deficient and has no cytochrome oxidase activity or accumulation of precursor of CoxII YDR231C S000002639
YBR161W	-	-	-0.0494355	CSH1	Probable catalytic subunit of a mannosylinositol phosphorylceramide (MIPC) synthase, forms a complex with probable regulatory subunit Csg2p; function in sphingolipid biosynthesis is overlapping with that of Sur1p Null mutant is viable, does not exhibit calcium sensitivity or alter the calcium sensitive phenotype of a sur1 null strain YBR161W S000000365
YJR080C	-	-	-0.0500063	AIM24	FMP26 Protein of unknown function; non-tagged protein is detected in purified mitochondria in high-throughput studies; null mutant displays increased frequency of mitochondrial genome loss and reduced growth rate in minimal glycerol media YJR080C S000003841
YDL060W	-	-	-0.0515555	TSR1	Protein required for processing of 20S pre-rRNA in the cytoplasm, associates with pre-40S ribosomal particles essential YDL060W S000002218
YGR057C	-	-	-0.0530217	LST7	Protein possibly involved in a post-Golgi secretory pathway; required for the transport of nitrogen-regulated amino acid permease Gap1p from the Golgi to the cell surface Reduced activity of the nitrogen-regulated permeases Gap1p and Put4p YGR057C S000003289
YGL162W	-	-	-0.0531381	SUT1	Transcription factor of the Zn[II]2Cys6 family involved in sterol uptake; involved in induction of hypoxic gene expression YGL162W S000003130
YJR010W	-	-	-0.0532298	MET3	ATP sulfurylase, catalyzes the primary step of intracellular sulfate activation, essential for assimilatory reduction of sulfate to sulfide, involved in methionine metabolism YJR010W S000003771
YKL109W	-	-	-0.053404	HAP4	Subunit of the heme-activated, glucose-repressed Hap2p/3p/4p/5p CCAAT-binding complex, a transcriptional activator and global regulator of respiratory gene expression; provides the principal activation function of the complex hap4 point mutants or disruptions are unable to grow on non-fermentable carbon sources YKL109W S000001592
YMR046C	-	-	-0.0535833		NO_MATCH
YCR073W-A	-	-	-0.0536601	SOL2	YCRX13W Protein with a possible role in tRNA export; shows similarity to 6-phosphogluconolactonase non-catalytic domains but does not exhibit this enzymatic activity; homologous to Sol1p, Sol3p, and Sol4p YCR073W-A S000000718
YBL008W	-	-	-0.0557495	HIR1	Subunit of the HIR complex, a nucleosome assembly complex involved in regulation of histone gene transcription; contributes to nucleosome formation, heterochromatic gene silencing, and formation of functional kinetochores Null mutant is viable, but HTA1-HTB1 transcription is derepressed and is no longer cell-cycle regulated; other mutations in this gene give 'spt' gene-class phenotype YBL008W S00…
YOR175C	-	-	-0.0578239	ALE1	LCA1|LPT1|SLC4 Lysophospholipid acyltransferase, partially redundant with Slc1p; part of MBOAT family of membrane-bound O-acyltransferases; key component of Lands cycle; may have role in fatty acid exchange at sn-2 position of mature glycerophospholipids YOR175C S000005701
YIL079C	-	-	-0.0578239	AIR1	RING finger protein that interacts with the arginine methyltransferase Hmt1p to regulate methylation of Npl3p, which modulates Npl3p function in mRNA processing and export; has similarity to Air2p YIL079C S000001341
YDR298C	-	-	-0.0578239	ATP5	OSC1 Subunit 5 of the stator stalk of mitochondrial F1F0 ATP synthase, which is an evolutionarily conserved enzyme complex required for ATP synthesis; homologous to bovine subunit OSCP (oligomycin sensitivity-conferring protein); phosphorylated null mutant is viable, but unable to grow on glycerol; exhibits high level of genetic instability YDR298C S000002706
YNR067C	-	-	-0.059375	DSE4	ENG1 Daughter cell-specific secreted protein with similarity to glucanases, degrades cell wall from the daughter side causing daughter to separate from mother YNR067C S000005350
YHR103W	-	-	-0.0598835	SBE22	Protein involved in the transport of cell wall components from the Golgi to the cell surface; similar in structure and functionally redundant with Sbe2p; involved in bud growth synthetic lethal with sbe2 mutation YHR103W S000001145
YLR097C	-	-	-0.0600096	HRT3	Putative SCF-ubiquitin ligase F-box protein, based on both genetic and physical interactions and sequence similarity; identified in association with Cdc53p, Skp1p and Ubi4 in large and small-scale studies YLR097C S000004087
YPR074C	-	-	-0.0613018	TKL1	Transketolase, similar to Tkl2p; catalyzes conversion of xylulose-5-phosphate and ribose-5-phosphate to sedoheptulose-7-phosphate and glyceraldehyde-3-phosphate in the pentose phosphate pathway; needed for synthesis of aromatic amino acids tkl1 tkl2 mutants are auxotrophic for aromatic amino acids YPR074C S000006278
YBL103C	-	-	-0.0617011	RTG3	Basic helix-loop-helix-leucine zipper (bHLH/Zip) transcription factor that forms a complex with another bHLH/Zip protein, Rtg1p, to activate the retrograde (RTG) and TOR pathways YBL103C S000000199
YOR272W	-	-	-0.0619286	YTM1	Constituent of 66S pre-ribosomal particles, required for maturation of the large ribosomal subunit YOR272W S000005798
YCR096C	-	-	-0.0628729	HMRA2	A2 Silenced copy of a2 at HMR; similarity to Alpha2p; required along with a1p for inhibiting expression of the HO endonuclease in a/alpha HO/HO diploid cells with an active mating-type interconversion system YCR096C S000000692
YDR259C	-	-	-0.0692964	YAP6	HAL7 Putative basic leucine zipper (bZIP) transcription factor; overexpression increases sodium and lithium tolerance YDR259C S000002667
YJL098W	-	-	-0.0699662	SAP185	Protein that forms a complex with the Sit4p protein phosphatase and is required for its function; member of a family of similar proteins including Sap4p, Sap155p, and Sap190p Null mutant is viable; sap185 sap190 double mutants grow slowly; sap155 sap185 sap190 triple mutants are inviable in ssd1-d backgrounds YJL098W S000003634
YEL044W	-	-	-0.0699662	IES6	Protein that associates with the INO80 chromatin remodeling complex under low-salt conditions Null: non essential. YEL044W S000000770
YDL128W	-	+	-0.0699662	VCX1	HUM1|MNR1 Vacuolar H+/Ca2+ exchanger involved in control of cytosolic Ca2+ concentration; has similarity to sodium/calcium exchangers, including the bovine Na+/Ca2+,K+ antiporter Null mutant is viable, sensitive to high Ca2+ conditions YDL128W S000002286
YOL146W	-	-	-0.0703248	PSF3	Subunit of the GINS complex (Sld5p, Psf1p, Psf2p, Psf3p), which is localized to DNA replication origins and implicated in assembly of the DNA replication machinery YOL146W S000005506
YER046W	-	-	-0.070456	SPO73	Meiosis-specific protein of unknown function, required for spore wall formation during sporulation; dispensible for both nuclear divisions during meiosis Null: Undergoes meiotic nuclear divisions but does not form spores YER046W S000000848
YPL091W	-	-	-0.0719408	GLR1	LPG17 Cytosolic and mitochondrial glutathione oxidoreductase, converts oxidized glutathione to reduced glutathione YPL091W S000006012
YBR078W	-	-	-0.073351	ECM33	GPI-anchored protein of unknown function, has a possible role in apical bud growth; GPI-anchoring on the plasma membrane crucial to function; phosphorylated in mitochondria; similar to Sps2p and Pst1p YBR078W S000000282
YNL239W	-	-	-0.0735231	LAP3	BLH1|GAL6|YCP1 Cysteine aminopeptidase with homocysteine-thiolactonase activity; protects cells against homocysteine toxicity; has bleomycin hydrolase activity in vitro; transcription is regulated by galactose via Gal4p; orthologous to human BLMH Null mutant is viable with no obvious growth defects but is leucine aminopeptidase deficient and hypersensitive to bleomycin; overexpression confers res…
YKL078W	-	-	-0.0739019	DHR2	Predominantly nucleolar DEAH-box ATP-dependent RNA helicase, required for 18S rRNA synthesis Null: essential YKL078W S000001561
YKL040C	-	+	-0.0739019	NFU1	NUB1 Protein involved in iron metabolism in mitochondria; similar to NifU, which is a protein required for the maturation of the Fe/S clusters of nitrogenase in nitrogen-fixing bacteria Null mutant is viable on YPD 30 degrees C, and is synthetically lethal with SSQ1 YKL040C S000001523
YPL281C	-	-	-0.0746221	ERR2	Protein of unknown function, has similarity to enolases YPL281C S000006202
YGR235C	-	-	-0.0758496		NO_MATCH
YFL023W	-	-	-0.0758496	BUD27	URI1 Protein involved in bud-site selection, nutrient signaling, and gene expression controlled by TOR kinase; diploid mutants show a random budding pattern rather than the wild-type bipolar pattern; plays a role in regulating Ty1 transposition YFL023W S000001871
YER027C	-	-	-0.0767869	GAL83	SPM1 One of three possible beta-subunits of the Snf1 kinase complex, allows nuclear localization of the Snf1 kinase complex in the presence of a nonfermentable carbon source; contains glycogen-binding domain YER027C S000000829
YOL117W	-	-	-0.0775722	RRI2	CSN10 Subunit of the COP9 signalosome (CSN) complex that cleaves the ubiquitin-like protein Nedd8 from SCF ubiquitin ligases; plays a role in the mating pheromone response Null: viable. Other phenotypes: Cdc53 accumulates exclusively in the 'rubinylated' form in an rri2-null YOL117W S000005477
YKL162C-A	-	-	-0.077784		NO_MATCH
YER070W	-	-	-0.0777887	RNR1	CRT7|RIR1|SDS12 Ribonucleotide-diphosphate reductase (RNR), large subunit; the RNR complex catalyzes the rate-limiting step in dNTP synthesis and is regulated by DNA replication and DNA damage checkpoint pathways via localization of the small subunits YER070W S000000872
YAL065C	-	-	-0.0785813		NO_MATCH
YHL038C	-	-	-0.0786636	CBP2	Mitochondrial protein required for splicing of the group I intron aI5 of the COB pre-mRNA, binds to the RNA to promote splicing; also involved in but not essential for splicing of the COB bI2 intron and the intron in the 21S rRNA gene YHL038C S000001030
YMR284W	-	-	-0.0787085	YKU70	HDF1|KU70|NES24 Subunit of the telomeric Ku complex (Yku70p-Yku80p), involved in telomere length maintenance, structure and telomere position effect; relocates to sites of double-strand cleavage to promote nonhomologous end joining during DSB repair YMR284W S000004897
YJL033W	-	-	-0.0797054	HCA4	DBP4|ECM24 Putative nucleolar DEAD box RNA helicase; high-copy number suppression of a U14 snoRNA processing mutant suggests an involvement in 18S rRNA synthesis YJL033W S000003570
YNL137C	-	-	-0.0810159	NAM9	MNA6 Mitochondrial ribosomal component of the small subunit Null mutant is viable but is respiration-deficient and loses mitochondrial DNA integrity YNL137C S000005081
YGR116W	-	-	-0.0813444	SPT6	CRE2|SSN20 Transcription elongation factor required for the maintenance of chromatin structure during transcription in order to inhibit transcription from promoters within the coding region YGR116W S000003348
YJR074W	-	-	-0.0816138	MOG1	Conserved nuclear protein that interacts with GTP-Gsp1p, which is a Ran homolog of the Ras GTPase family, and stimulates nucleotide release, involved in nuclear protein import, nucleotide release is inhibited by Yrb1p Null mutant is viable, temperature sensitive, exhibits defects in nuclear-protein import; MOG1 overexpression supresses the temperature sensitivity of gsp1 strains; overexpression o…
YDR449C	-	-	-0.0816138	UTP6	Nucleolar protein, component of the small subunit (SSU) processome containing the U3 snoRNA that is involved in processing of pre-18S rRNA YDR449C S000002857
YKR077W	-	-	-0.0816138	MSA2	Putative transcriptional activator, that interacts with G1-specific transcription factor, MBF and G1-specific promoters; ortholog of Msa2p, an MBF and SBF activator that regulates G1-specific transcription and cell cycle initiation YKR077W S000001785
YJL190C	-	-	-0.0816138	RPS22A	RPS24 Protein component of the small (40S) ribosomal subunit; nearly identical to Rps22Bp and has similarity to E. coli S8 and rat S15a ribosomal proteins YJL190C S000003726
YGL086W	-	-	-0.0816138	MAD1	Coiled-coil protein involved in the spindle-assembly checkpoint; phosphorylated by Mps1p upon checkpoint activation which leads to inhibition of the activity of the anaphase promoting complex; forms a complex with Mad2p YGL086W S000003054
YER127W	-	-	-0.0816138	LCP5	Essential protein involved in maturation of 18S rRNA; depletion leads to inhibited pre-rRNA processing and reduced polysome levels; localizes primarily to the nucleolus Null mutant is inviable; there is also a temperature sensitive mutant defective in rRNA processing and translation YER127W S000000929
YLL043W	-	-	-0.0821938	FPS1	Plasma membrane channel, member of major intrinsic protein (MIP) family; involved in efflux of glycerol and in uptake of acetic acid and the trivalent metalloids arsenite and antimonite; phosphorylated by Hog1p MAPK under acetate stress YLL043W S000003966
YBR042C	-	-	-0.0830501	CST26	Protein of unknown function, affects chromosome stability when overexpressed YBR042C S000000246
YPL203W	-	-	-0.0835094	TPK2	PKA2|PKA3|YKR1 cAMP-dependent protein kinase catalytic subunit; promotes vegetative growth in response to nutrients via the Ras-cAMP signaling pathway; inhibited by regulatory subunit Bcy1p in the absence of cAMP; partially redundant with Tpk1p and Tpk3p Null mutant haploids are defective for invasive growth; diploid homozygous null mutants are defective for pseudohyphal growth. YPL203W S000006124
YIL143C	-	-	-0.0835094	SSL2	LOM3|RAD25 Component of the holoenzyme form of RNA polymerase transcription factor TFIIH, has DNA-dependent ATPase/helicase activity and is required, with Rad3p, for unwinding promoter DNA; involved in DNA repair; homolog of human ERCC3 YIL143C S000001405
YLL054C	-	-	-0.0843006		NO_MATCH
YBR204C	-	-	-0.0847228		NO_MATCH
YNR054C	-	-	-0.0853265	ESF2	ABT1 Essential nucleolar protein involved in pre-18S rRNA processing; component of the small subunit (SSU) processome; has sequence similarity to mABT1, a mouse transcription activator YNR054C S000005337
YDL097C	-	-	-0.0853925	RPN6	NAS4 Essential, non-ATPase regulatory subunit of the 26S proteasome lid required for the assembly and activity of the 26S proteasome; the human homolog (S9 protein) partially rescues Rpn6p depletion YDL097C S000002255
YOL160W	-	-	-0.0853925		NO_MATCH
YBL100C	-	-	-0.0853925		NO_MATCH
YJR054W	-	-	-0.0857031		NO_MATCH
YDR258C	-	-	-0.0862529	HSP78	Oligomeric mitochondrial matrix chaperone that cooperates with Ssc1p in mitochondrial thermotolerance after heat shock; prevents the aggregation of misfolded matrix proteins; component of the mitochondrial proteolysis system Null mutant is viable but in ssc1 mutant background gives rho- phenotype YDR258C S000002666
YML108W	-	-	-0.087263		NO_MATCH
YER152C	-	-	-0.087263		NO_MATCH
YML049C	-	-	-0.087263	RSE1	Protein involved in pre-mRNA splicing; component of the pre-spliceosome; associates with U2 snRNA; involved in ER to Golgi transport An uncharacterized mutant allele grows slowly and exhibits defects in ER-to-Golgi transport and mRNA splicing. YML049C S000004513
YEL037C	-	-	-0.0874728	RAD23	Protein with ubiquitin-like N terminus, recognizes and binds damaged DNA (with Rad4p) during nucleotide excision repair; regulates Rad4p levels, subunit of Nuclear Excision Repair Factor 2 (NEF2); homolog of human HR23A and HR23B proteins radiation sensitive YEL037C S000000763
YHR108W	-	-	-0.0879206	GGA2	Golgi-localized protein with homology to gamma-adaptin, interacts with and regulates Arf1p and Arf2p in a GTP-dependent manner in order to facilitate traffic through the late Golgi Single and double knockouts are viable at both 30 C and 37 C. Cells lacking GGA1, GGA2 exhibit defects in invertase processing, vacuolar morphology, maturation of alpha-factor, and sorting of CPY, proteinase A to the v…
YDR123C	-	-	-0.0891212	INO2	DIE1|SCS1 Component of the heteromeric Ino2p/Ino4p basic helix-loop-helix transcription activator that binds inositol/choline-responsive elements (ICREs), required for derepression of phospholipid biosynthetic genes in response to inositol depletion The null mutant is viable but auxotrophic for inositol and choline. The null mutant can also display aberant cell shape and defects in nuclear segreg…
YDR545W	-	-	-0.0891212	YRF1-1	YRF1 Helicase encoded by the Y' element of subtelomeric regions, highly expressed in the mutants lacking the telomerase component TLC1; potentially phosphorylated by Cdc28p YDR545W S000002953
YDL239C	-	-	-0.0892164	ADY3	Protein required for spore wall formation, thought to mediate assembly of a Don1p-containing structure at the leading edge of the prospore membrane via interaction with spindle pole body components; potentially phosphorylated by Cdc28p Null forms largely asci that contain 2 spores (dyads) when sporulated. Sporulation defect in ady3ady3 cells is due to a failure to synthesize spore wall polymers. …
YDR396W	-	-	-0.0899553		NO_MATCH
YGR003W	-	-	-0.0909673	CUL3	CULB Ubiquitin-protein ligase, member of the cullin family with similarity to Cdc53p and human CUL3; required for ubiquitin-dependent degredation of the RNA Polymerase II subunit RPO21 YGR003W S000003235
YER094C	-	-	-0.0909673	PUP3	SCS32 Beta 3 subunit of the 20S proteasome involved in ubiquitin-dependent catabolism; human homolog is subunit C10 YER094C S000000896
YHR034C	-	-	-0.0909673	PIH1	NOP17 Protein of unresolved function; may function in protein folding and/or rRNA processing, interacts with a chaperone (Hsp82p), two chromatin remodeling factors (Rvb1p, Rvb2p) and two rRNA processing factors (Rrp43p, Nop58p) null has both reduced growth and reduced protein synthesis rates YHR034C S000001076
YNL221C	-	-	-0.0928012	POP1	Subunit of both RNase MRP, which cleaves pre-rRNA, and nuclear RNase P, which cleaves tRNA precursors to generate mature 5' ends; binds to the RPR1 RNA subunit in RNase P Null mutant is inviable; temperature-sensitive mutant shows defect in processing pre-tRNAs and pre-rRNA at nonpermissive temperature YNL221C S000005165
YMR229C	-	-	-0.0928012	RRP5	Protein required for the synthesis of both 18S and 5.8S rRNA; C-terminal region is crucial for the formation of 18S rRNA and N-terminal region is required for the 5.8S rRNA; component of small ribosomal subunit (SSU) processosome Overexpression of RRP5 facilitates mitochondrial import of hydrophobic proteins; overexpression of an RRP5 mutant complements the rRNA processing defect of the null alll…
YJL046W	-	-	-0.0940083	AIM22	Putative lipoate-protein ligase A family member; null mutant displays respiratory growth defect, decreased frequency of mitochondrial genome loss (petite formation) and severe growth defect in minimal glycerol media YJL046W S000003582
YLR187W	-	-	-0.0946233	SKG3	Protein of unknown function; green fluorescent protein (GFP)-fusion protein localizes to the cell periphery, cytoplasm, bud, and bud neck; potential Cdc28p substrate; similar to Caf120p and Skg4p YLR187W S000004177
YER176W	-	-	-0.0946233	ECM32	HEL1|MTT1 DNA dependent ATPase/DNA helicase belonging to the Dna2p- and Nam7p-like family of helicases that is involved in modulating translation termination; interacts with the translation termination factors, localized to polysomes YER176W S000000978
YCL020W	-	-	-0.0946233		NO_MATCH
YBR272C	-	-	-0.0964336	HSM3	Protein of unknown function, involved in DNA mismatch repair during slow growth; has weak similarity to Msh1p Null mutant is viable, hsm3 null mutants exhibit enhanced rates of spontaneous mutation to canavanine resistance and reversions of lys1-1 and his1-7, increased rate of intragenic mitotic recombination at the ADE2 gene, and reduced ability to correct DNA heteroduplexes YBR272C S000000476
YOR158W	-	-	-0.0964336	PET123	Mitochondrial ribosomal protein of the small subunit; PET123 exhibits genetic interactions with PET122, which encodes a COX3 mRNA-specific translational activator Null mutant is viable but is rho- (with large deletions in mtDNA); pet123 mutations can suppress pet122 mutations; some pet123 alleles show synthetic phenotypes with mrp1 mutations YOR158W S000005684
YNL071W	-	-	-0.0964336	LAT1	ODP2|PDA2 Dihydrolipoamide acetyltransferase component (E2) of pyruvate dehydrogenase complex, which catalyzes the oxidative decarboxylation of pyruvate to acetyl-CoA YNL071W S000005015
YPL231W	-	-	-0.0982322	FAS2	Alpha subunit of fatty acid synthetase, which catalyzes the synthesis of long-chain saturated fatty acids; contains beta-ketoacyl reductase and beta-ketoacyl synthase activities; phosphorylated Fatty acid synthetase deficient YPL231W S000006152
YOR048C	-	-	-0.0982322	RAT1	HKE1|TAP1|XRN2 Nuclear 5' to 3' single-stranded RNA exonuclease, involved in RNA metabolism, including rRNA and snRNA processing as well as mRNA transcription termination YOR048C S000005574
YGR254W	-	-	-0.0984359	ENO1	HSP48 Enolase I, a phosphopyruvate hydratase that catalyzes the conversion of 2-phosphoglycerate to phosphoenolpyruvate during glycolysis and the reverse reaction during gluconeogenesis; expression is repressed in response to glucose YGR254W S000003486
YPL220W	-	-	-0.0999952	RPL1A	SSM1 N-terminally acetylated protein component of the large (60S) ribosomal subunit, nearly identical to Rpl1Bp and has similarity to E. coli L1 and rat L10a ribosomal proteins; rpl1a rpl1b double null mutation is lethal Null mutant is viable; shows double mutant lethality with rpl1b (ssm2b) null mutants YPL220W S000006141
YMR194W	-	-	-0.101638	RPL36A	RPL39B N-terminally acetylated protein component of the large (60S) ribosomal subunit, nearly identical to Rpl36Bp and has similarity to rat L36 ribosomal protein; binds to 5.8 S rRNA YMR194W S000004807
YML123C	-	-	-0.101656	PHO84	phoT High-affinity inorganic phosphate (Pi) transporter and low-affinity manganese transporter; regulated by Pho4p and Spt7p; mutation confers resistance to arsenate; exit from the ER during maturation requires Pho86p YML123C S000004592
YMR158W-A	-	-	-0.103316		NO_MATCH
YNR012W	-	-	-0.103559	URK1	Uridine/cytidine kinase, component of the pyrimidine ribonucleotide salvage pathway that converts uridine into UMP and cytidine into CMP; involved in the pyrimidine deoxyribonucleotide salvage pathway, converting deoxycytidine into dCMP YNR012W S000005295
YKR018C	-	-	-0.103559		NO_MATCH
YOR002W	-	-	-0.10357	ALG6	Alpha 1,3 glucosyltransferase, involved in transfer of oligosaccharides from dolichyl pyrophosphate to asparagine residues of proteins during N-linked protein glycosylation; mutations in human ortholog are associated with disease Null mutant is viable and defective in protein glycosylation. YOR002W S000005528
YER038C	-	-	-0.105451	KRE29	Essential subunit of the Mms21-Smc5-Smc6 complex; protein of unknown function; required for growth and DNA repair; heterozygous mutant shows haploinsufficiency in K1 killer toxin resistance YER038C S000000840
YFL018C	-	-	-0.105734	LPD1	HPD1 Dihydrolipoamide dehydrogenase, the lipoamide dehydrogenase component (E3) of the pyruvate dehydrogenase and 2-oxoglutarate dehydrogenase multi-enzyme complexes unable to utilize glycine as sole nitrogen source YFL018C S000001876
YNL096C	-	-	-0.106202	RPS7B	Protein component of the small (40S) ribosomal subunit, nearly identical to Rps7Ap; interacts with Kti11p; deletion causes hypersensitivity to zymocin; has similarity to rat S7 and Xenopus S8 ribosomal proteins YNL096C S000005040
YOL011W	-	-	-0.107055	PLB3	Phospholipase B (lysophospholipase) involved in phospholipid metabolism; hydrolyzes phosphatidylinositol and phosphatidylserine and displays transacylase activity in vitro YOL011W S000005371
YNR027W	-	-	-0.107055	BUD17	Protein involved in bud-site selection; diploid mutants display a random budding pattern instead of the wild-type bipolar pattern YNR027W S000005310
YML092C	-	-	-0.107055	PRE8	Alpha 2 subunit of the 20S proteasome YML092C S000004557
YER137C	-	-	-0.110507		NO_MATCH
YAR007C	-	-	-0.11102	RFA1	BUF2|FUN3|RPA1 Subunit of heterotrimeric Replication Protein A (RPA), which is a highly conserved single-stranded DNA binding protein involved in DNA replication, repair, and recombination Null mutant is inviable; cells lacking RFA1 accumulate as multiply budded cells with a single nucleus suggesting a defect in DNA replication; rfa1 repair defects are suppressed by high copy RAD52 YAR007C S00000…
YKL066W	-	-	-0.111317		NO_MATCH
YLR132C	-	-	-0.112007		NO_MATCH
YEL050C	-	-	-0.112217	RML2	Mitochondrial ribosomal protein of the large subunit, has similarity to E. coli L2 ribosomal protein; fat21 mutant allele causes inability to utilize oleate and may interfere with activity of the Adr1p transcription factor Null mutant is viable but is respiration-deficient and converts to rho- cytoplasmic petites YEL050C S000000776
YGL117W	-	-	-0.112879		NO_MATCH
YBL029W	-	-	-0.114462		NO_MATCH
YGR244C	-	-	-0.115605	LSC2	Beta subunit of succinyl-CoA ligase, which is a mitochondrial enzyme of the TCA cycle that catalyzes the nucleotide-dependent conversion of succinyl-CoA to succinate Null mutant is viable but grows slowly on minimal glycerol or pyruvate; mutant suppresses idh2 null mutants for growth on glycerol YGR244C S000003476
YJL153C	-	-	-0.116335	INO1	APR1 Inositol 1-phosphate synthase, involved in synthesis of inositol phosphates and inositol-containing phospholipids; transcription is coregulated with other phospholipid biosynthetic genes by Ino2p and Ino4p, which bind the UASINO DNA element Null mutant is viable, inositol auxotroph YJL153C S000003689
YGL011C	-	-	-0.116995	SCL1	PRC2 Alpha 1 subunit of the 20S core complex of the 26S proteasome involved in the degradation of ubiquitinated substrates; essential for growth; detected in the mitochondria Null mutant is inviable, SCL1 is a dominant suppressor of the ts lethality of crl3 YGL011C S000002979
YOR106W	-	-	-0.117284	VAM3	PTH1 Syntaxin-related protein required for vacuolar assembly; functions with Vam7p in vacuolar protein trafficking; member of the syntaxin family of proteins Null mutant is viable, defective in processing of vacuolar hydrolases. YOR106W S000005632
YOR181W	-	-	-0.117284	LAS17	BEE1 Actin assembly factor, activates the Arp2/3 protein complex that nucleates branched actin filaments; localizes with the Arp2/3 complex to actin patches; homolog of the human Wiskott-Aldrich syndrome protein (WASP) Null mutant is viable, demonstrates impaired budding and cytokenesis and severely disrupted cortical actin; other mutants accumulate secretory vesicles in the bud YOR181W S000005707
YCL045C	-	-	-0.118423		NO_MATCH
YLR015W	-	-	-0.118876	BRE2	CPS60 Subunit of the COMPASS (Set1C) complex, which methylates histone H3 on lysine 4 and is required in transcriptional silencing near telomeres; involved in telomere maintenance; similar to trithorax-group protein ASH2L Null: null mutant is sensitive to brefeldin A YLR015W S000004005
YOL155C	-	-	-0.118952	HPF1	Haze-protective mannoprotein that reduces the particle size of aggregated proteins in white wines YOL155C S000005515
YOR240W	-	-	-0.11898		NO_MATCH
YBL068W	-	-	-0.120527	PRS4	5-phospho-ribosyl-1(alpha)-pyrophosphate synthetase, involved in nucleotide, histidine, and tryptophan biosynthesis; one of five related enzymes, which are active as heteromultimeric complexes YBL068W S000000164
YPL134C	-	-	-0.120714	ODC1	Mitochondrial inner membrane transporter, exports 2-oxoadipate and 2-oxoglutarate from the mitochondrial matrix to the cytosol for lysine and glutamate biosynthesis and lysine catabolism; suppresses, in multicopy, an fmc1 null mutation YPL134C S000006055
YAL022C	-	-	-0.120961	FUN26	Nucleoside transporter with broad nucleoside selectivity; localized to intracellular membranes YAL022C S000000020
YOL120C	-	-	-0.121229	RPL18A	RP28A Protein component of the large (60S) ribosomal subunit, identical to Rpl18Bp and has similarity to rat L18 ribosomal protein; intron of RPL18A pre-mRNA forms stem-loop structures that are a target for Rnt1p cleavage leading to degradation YOL120C S000005480
YPL232W	-	-	-0.121879	SSO1	Plasma membrane t-SNARE involved in fusion of secretory vesicles at the plasma membrane and in vesicle fusion during sporulation; forms a complex with Sec9p that binds v-SNARE Snc2p; syntaxin homolog; functionally redundant with Sso2p SSO1, SSO2 double null mutant is inviable; high copy number of either SSO1 or SSO2 suppresses mutations in late-acting sec genes (sec1,3,5,9,15) YPL232W S000006153
YGL225W	-	-	-0.122073	VRG4	GOG5|LDB3|VAN2|VIG4 Golgi GDP-mannose transporter; regulates Golgi function and glycosylation in Golgi Null mutant is inviable; mutants exist with defects in Golgi-specific glycosylation, resistance to vanadate, sensitivity to aminoglycosides, and sporulation defects YGL225W S000003193
YMR009W	-	-	-0.122259	ADI1	Acireductone dioxygenease involved in the methionine salvage pathway; ortholog of human MTCBP-1; transcribed with YMR010W and regulated post-transcriptionally by RNase III (Rnt1p) cleavage; ADI1 mRNA is induced in heat shock conditions YMR009W S000004611
YGR070W	-	-	-0.122259	ROM1	SKC1 GDP/GTP exchange protein (GEP) for Rho1p; mutations are synthetically lethal with mutations in rom2, which also encodes a GEP Synthetically lethal with ROM2 (growth arrest with small bud and cell lysis) YGR070W S000003302
YNL169C	-	-	-0.122259	PSD1	Phosphatidylserine decarboxylase of the mitochondrial inner membrane, converts phosphatidylserine to phosphatidylethanolamine Null mutant is viable, shows little change in growth properties or phospholipid composition, but shows loss of detectable decarboxylase activity; psd1 psd2 double mutant is auxotrophic for ethanolamine and shows severe defect in conversion of phosphatidylserine to phosphat…
YCR011C	-	-	-0.122259	ADP1	Putative ATP-dependent permease of the ABC transporter family of proteins YCR011C S000000604
YNL111C	-	-	-0.123897	CYB5	Cytochrome b5, involved in the sterol and lipid biosynthesis pathways; acts as an electron donor to support sterol C5-6 desaturation Null mutant is viable, cyb5 mutations suppress ketoconazole hypersensitivity of a P450 reductase deficient strain YNL111C S000005055
YMR072W	-	-	-0.123897	ABF2	Mitochondrial DNA-binding protein involved in mitochondrial DNA replication and recombination, member of HMG1 DNA-binding protein family; activity may be regulated by protein kinase A phosphorylation YMR072W S000004676
YLL027W	-	-	-0.125526	ISA1	Mitochondrial matrix protein involved in biogenesis of the iron-sulfur (Fe/S) cluster of Fe/S proteins, isa1 deletion causes loss of mitochondrial DNA and respiratory deficiency; depletion reduces growth on nonfermentable carbon sources YLL027W S000003950
YNL240C	-	-	-0.125526	NAR1	Nuclear architecture related protein; component of the cytosolic iron-sulfur (FeS) protein assembly machinery, required for maturation of cytosolic and nuclear FeS proteins; homologous to human Narf YNL240C S000005184
YML028W	-	-	-0.125817	TSA1	TPX1|ZRG14 Thioredoxin peroxidase, acts as both a ribosome-associated and free cytoplasmic antioxidant; self-associates to form a high-molecular weight chaperone complex under oxidative stress; deletion results in mutator phenotype Null mutant is viable, grows slower than wild-type under aerobic conditions YML028W S000004490
YKL194C	-	-	-0.126571	MST1	Mitochondrial threonyl-tRNA synthetase YKL194C S000001677
YLR247C	-	-	-0.126596	IRC20	Putative helicase; localizes to the mitochondrion and the nucleus; YLR247C is not an essential gene; null mutant displays increased levels of spontaneous Rad52p foci YLR247C S000004237
YPL280W	-	-	-0.126826	HSP32	Possible chaperone and cysteine protease with similarity to E. coli Hsp31 and S. cerevisiae Hsp31p, Hsp33p, and Sno4p; member of the DJ-1/ThiJ/PfpI superfamily, which includes human DJ-1 involved in Parkinson's disease YPL280W S000006201
YPL222W	-	-	-0.127145	FMP40	Putative protein of unknown function; the authentic, non-tagged protein is detected in highly purified mitochondria in high-throughput studies YPL222W S000006143
YPL052W	-	-	-0.127145	OAZ1	YPL052W-A Regulator of ornithine decarboxylase (Spe1p), antizyme that binds to Spe1p to regulate ubiquitin-independent degradation; ribosomal frameshifting during synthesis of Oaz1p and its ubiquitin-mediated degradation are both polyamine-regulated YPL052W S000005973
YNL192W	-	-	-0.127145	CHS1	USA4 Chitin synthase I, requires activation from zymogenic form in order to catalyze the transfer of N-acetylglucosamine (GlcNAc) to chitin; required for repairing the chitin septum during cytokinesis; transcription activated by mating factor YNL192W S000005136
YKL053C-A	-	-	-0.127145	MDM35	Mitochondrial intermembrane space cysteine motif protein; mutation affects mitochondrial distribution and morphology YKL053C-A S000007243
YFL065C	-	-	-0.127145		NO_MATCH
YDL234C	-	-	-0.12829	GYP7	GTPase-activating protein for yeast Rab family members including: Ypt7p (most effective), Ypt1p, Ypt31p, and Ypt32p (in vitro); involved in vesicle mediated protein trafficking YDL234C S000002393
YDR324C	-	-	-0.128345	UTP4	Nucleolar protein, component of the small subunit (SSU) processome containing the U3 snoRNA that is involved in processing of pre-18S rRNA YDR324C S000002732
YHL039W	-	-	-0.128754		NO_MATCH
YER040W	-	-	-0.128938	GLN3	Transcriptional activator of genes regulated by nitrogen catabolite repression (NCR), localization and activity regulated by quality of nitrogen source YER040W S000000842
YER186C	-	-	-0.130354		NO_MATCH
YKL199C	-	-	-0.130901		NO_MATCH
YMR100W	-	-	-0.131654	MUB1	Protein of unknown function, deletion causes multi-budding phenotype; has similarity to Aspergillus nidulans samB gene Null mutant is viable but shows multi-budding YMR100W S000004706
YKL044W	-	-	-0.131879		NO_MATCH
YPR122W	-	-	-0.131944	AXL1	FUS5|STE22 Haploid specific endoprotease that performs one of two N-terminal cleavages during maturation of a-factor mating pheromone; required for axial budding pattern of haploid cells Null mutant is viable; exhibits reduced a-factor expresion; haploid mutants show bipolar budding pattern (diploid pattern) rather than the normal axial (spiral) budding pattern YPR122W S000006326
YFL025C	-	-	-0.131944	BST1	PER17 GPI inositol deacylase of the ER that negatively regulates COPII vesicle formation, prevents production of vesicles with defective subunits, required for proper discrimination between resident ER proteins and Golgi-bound cargo molecules YFL025C S000001869
YDR217C	-	-	-0.131944	RAD9	DNA damage-dependent checkpoint protein, required for cell-cycle arrest in G1/S, intra-S, and G2/M; transmits checkpoint signal by activating Rad53p and Chk1p; hyperphosphorylated by Mec1p and Tel1p; potential Cdc28p substrate radiation sensitive YDR217C S000002625
YDR116C	-	-	-0.13212	MRPL1	Mitochondrial ribosomal protein of the large subunit YDR116C S000002523
YCR015C	-	-	-0.132423		NO_MATCH
YDR063W	-	-	-0.133279	AIM7	Putative protein of unknown function; green fluorescent protein (GFP)-fusion protein localizes to the cytoplasm and nucleus; null mutant is viable and displays decreased frequency of mitochondrial genome loss (petite formation) YDR063W S000002470
YIL037C	-	-	-0.133311	PRM2	Pheromone-regulated protein, predicted to have 4 transmembrane segments and a coiled coil domain; regulated by Ste12p YIL037C S000001299
YNL197C	-	-	-0.133348	WHI3	RNA binding protein that sequesters CLN3 mRNA in cytoplasmic foci; cytoplasmic retention factor for Cdc28p and associated cyclins; regulates cell fate and dose-dependently regulates the critical cell size required for passage through Start Null mutant is viable and defective in filamentous growth YNL197C S000005141
YLR306W	-	-	-0.133525	UBC12	Enzyme that mediates the conjugation of Rub1p, a ubiquitin-like protein, to other proteins; related to E2 ubiquitin-conjugating enzymes Null mutant is viable with no obvious phenotypes. Synthetically lethal with cdc34(ubc3) ts mutant YLR306W S000004297
YOR025W	-	-	-0.135097	HST3	Member of the Sir2 family of NAD(+)-dependent protein deacetylases; involved along with Hst4p in telomeric silencing, cell cycle progression, radiation resistance, genomic stability and short-chain fatty acid metabolism YOR025W S000005551
YGL179C	-	-	-0.135097	TOS3	Protein kinase, related to and functionally redundant with Elm1p and Sak1p for the phosphorylation and activation of Snf1p; functionally orthologous to LKB1, a mammalian kinase associated with Peutz-Jeghers cancer-susceptibility syndrome YGL179C S000003147
YPR155C	-	-	-0.137791	NCA2	Protein involved in regulation of mitochondrial expression of subunits 6 (Atp6p) and 8 (Atp8p) of the Fo-F1 ATP synthase; functions with Nca3p YPR155C S000006359
YKL140W	-	-	-0.138213	TGL1	YKL5 Steryl ester hydrolase, one of three gene products (Yeh1p, Yeh2p, Tgl1p) responsible for steryl ester hydrolase activity and involved in sterol homeostasis; localized to lipid particle membranes YKL140W S000001623
YJR013W	-	-	-0.138213	GPI14	PMH1 Glycosylphosphatidylinositol-alpha 1,4 mannosyltransferase I, involved in GPI anchor biosynthesis, requires Pbn1p for function; homolog of mammalian PIG-M YJR013W S000003774
YFL046W	-	-	-0.138686	FMP32	Putative protein of unknown function; the authentic, non-tagged protein is detected in highly purified mitochondria in high-throughput studies YFL046W S000001848
YDL137W	-	-	-0.139369	ARF2	ADP-ribosylation factor, GTPase of the Ras superfamily involved in regulation of coated formation vesicles in intracellular trafficking within the Golgi; functionally interchangeable with Arf1p YDL137W S000002296
YGL158W	-	-	-0.141294	RCK1	Protein kinase involved in the response to oxidative stress; identified as suppressor of S. pombe cell cycle checkpoint mutations YGL158W S000003126
YEL001C	-	-	-0.141693	IRC22	Putative protein of unknown function; green fluorescent protein (GFP)-fusion localizes to the ER; YEL001C is non-essential; null mutant displays increased levels of spontaneous Rad52p foci YEL001C S000000727
YLR160C	-	-	-0.142522	ASP3-4	ASP3 Cell-wall L-asparaginase II, involved in asparagine catabolism; expression is induced during nitrogen starvation; four copies of ASP3 are present in the genome reference strain S288C YLR160C S000004150
YKR080W	-	-	-0.142821	MTD1	NAD-dependent 5,10-methylenetetrahydrafolate dehydrogenase, plays a catalytic role in oxidation of cytoplasmic one-carbon units; expression is regulated by Bas1p and Bas2p, repressed by adenine, and may be induced by inositol and choline Null mutant is viable, associated with loss of NAD-dependent 5,10-methylene-THF dehydrogenase activity and a purine requirement in some genetic backgrounds YKR08…
YJR040W	-	+	-0.142821	GEF1	CLC Chloride channel localized to late- or post-Golgi vesicles, involved in iron metabolism; highly homologous to voltage-gated chloride channels in vertebrates YJR040W S000003801
YDR407C	-	-	-0.142821	TRS120	One of 10 subunits of the transport protein particle (TRAPP) complex of the cis-Golgi which mediates vesicle docking and fusion; involved in endoplasmic reticulum (ER) to Golgi membrane traffic YDR407C S000002815
YBL016W	-	-	-0.142821	FUS3	DAC2 Mitogen-activated serine/threonine protein kinase involved in mating; phosphoactivated by Ste7p; substrates include Ste12p, Far1p, Bni1p, Sst2p; inhibits invasive growth during mating by phosphorylating Tec1p, promoting its degradation sterile; divide continuously in the presence of pheromones; form prezygotes with wild-type cells of opposite mating type but cannot undergo cell fusion YBL016…
YLR344W	-	-	-0.144212	RPL26A	Protein component of the large (60S) ribosomal subunit, nearly identical to Rpl26Bp and has similarity to E. coli L24 and rat L26 ribosomal proteins; binds to 5.8S rRNA YLR344W S000004336
YPR133C	-	-	-0.144339	SPN1	IWS1 Protein that interacts with Spt6p and copurifies with Spt5p and RNA polymerase II, probable transcriptional elongation factor; metazoan homologs contain an acidic N terminus; mutations in the gene confer an Spt- phenotype YPR133C S000006337
YOR039W	+	+	-0.144339	CKB2	Beta' regulatory subunit of casein kinase 2, a Ser/Thr protein kinase with roles in cell growth and proliferation; the holoenzyme also contains CKA1, CKA2 and CKB1, the many substrates include transcription factors and all RNA polymerases YOR039W S000005565
YKL112W	-	-	-0.144339	ABF1	BAF1|OBF1|REB2|SBF1 DNA binding protein with possible chromatin-reorganizing activity involved in transcriptional activation, gene silencing, and DNA replication and repair YKL112W S000001595
YFL064C	-	-	-0.144339		NO_MATCH
YDL206W	-	-	-0.144339		NO_MATCH
YNL084C	-	-	-0.144545	END3	EH domain-containing protein involved in endocytosis, actin cytoskeletal organization and cell wall morphogenesis; forms a complex with Sla1p and Pan1p Null mutant is viable and defective in endocytosis YNL084C S000005028
YOL122C	-	-	-0.144841	SMF1	SBS1 Divalent metal ion transporter with a broad specificity for di-valent and tri-valent metals; post-translationally regulated by levels of metal ions; member of the Nramp family of metal transport proteins YOL122C S000005482
YGR203W	-	-	-0.145849		NO_MATCH
YMR105C	-	-	-0.146468	PGM2	GAL5 Phosphoglucomutase, catalyzes the conversion from glucose-1-phosphate to glucose-6-phosphate, which is a key step in hexose metabolism; functions as the acceptor for a Glc-phosphotransferase Null mutant is viable, pgm1 pgm2 deletion mutants fail to grow on galactose YMR105C S000004711
YOR221C	-	-	-0.14735	MCT1	Predicted malonyl-CoA:ACP transferase, putative component of a type-II mitochondrial fatty acid synthase that produces intermediates for phospholipid remodeling Null mutant is viable, respiratory deficient YOR221C S000005747
YGR080W	-	-	-0.14735	TWF1	Twinfilin, highly conserved actin monomer-sequestering protein involved in regulation of the cortical actin cytoskeleton, composed of two cofilin-like regions, localizes actin monomers to sites of rapid filament assembly Null mutant is viable, twf1 null cof1-22 mutants exhibit synthetic lethality YGR080W S000003312
YER064C	-	-	-0.147612		NO_MATCH
YKL104C	-	-	-0.147911	GFA1	Glutamine-fructose-6-phosphate amidotransferase, catalyzes the formation of glucosamine-6-P and glutamate from fructose-6-P and glutamine in the first step of chitin biosynthesis Null mutant is viable, glucosamine auxotroph YKL104C S000001587
YGL069C	-	-	-0.148807		NO_MATCH
YHR049W	-	-	-0.148843	FSH1	Serine hydrolase that localizes to both the nucleus and cytoplasm; sequence is similar to Fsh2p and Fsh3p YHR049W S000001091
YPL140C	-	-	-0.149775	MKK2	LPI6|SSP33 Mitogen-activated kinase kinase involved in protein kinase C signaling pathway that controls cell integrity; upon activation by Bck1p phosphorylates downstream target, Slt2p; functionally redundant with Mkk1p Null mutant is viable and shows no obvious phenotypes; mkk1 mkk2 double mutant is caffeine-sensitive and shows a temperature-sensitive cell lysis defect remediated by osmotic stab…
YLR264W	-	-	-0.149836	RPS28B	RPS33B Protein component of the small (40S) ribosomal subunit; nearly identical to Rps28Ap and has similarity to rat S28 ribosomal protein YLR264W S000004254
YNR034W	-	-	-0.150328	SOL1	Protein with a possible role in tRNA export; shows similarity to 6-phosphogluconolactonase non-catalytic domains but does not exhibit this enzymatic activity; homologous to Sol2p, Sol3p, and Sol4p YNR034W S000005317
YLR317W	-	-	-0.150328		NO_MATCH
YBR056W	-	-	-0.150328		NO_MATCH
YDR276C	-	-	-0.151804	PMP3	SNA1 Small plasma membrane protein related to a family of plant polypeptides that are overexpressed under high salt concentration or low temperature, not essential for viability, deletion causes hyperpolarization of the plasma membrane potential Null mutant is viable and sensitive to cations such as sodium YDR276C S000002684
YAR002C-A	-	-	-0.151804	ERP1	Protein that forms a heterotrimeric complex with Erp2p, Emp24p, and Erv25p; member, along with Emp24p and Erv25p, of the p24 family involved in ER to Golgi transport and localized to COPII-coated vesicles null mutant is viable; delayed transport of Gas1p and invertase YAR002C-A S000002129
YBR021W	-	-	-0.152607	FUR4	Uracil permease, localized to the plasma membrane; expression is tightly regulated by uracil levels and environmental cues YBR021W S000000225
YDR383C	-	-	-0.152638	NKP1	Non-essential kinetochore protein, subunit of the Ctf19 central kinetochore complex (Ctf19p-Mcm21p-Okp1p-Mcm22p-Mcm16p-Ctf3p-Chl4p-Mcm19p-Nkp1p-Nkp2p-Ame1p-Mtw1p) YDR383C S000002791
YER022W	-	-	-0.152831	SRB4	MED17 Subunit of the RNA polymerase II mediator complex; associates with core polymerase subunits to form the RNA polymerase II holoenzyme; essential for transcriptional regulation Null mutant is inviable, srb4 (ts) mutants display global defects in mRNA synthesis; srb4 mutants are suppressed by mutations in NCB1 YER022W S000000824
YPR112C	-	-	-0.153272	MRD1	Essential conserved protein that associates with 35S precursor rRNA and is required for its initial processing at the A(0)-A(2) cleavage sites, shows partial nucleolar localization, contains five consensus RNA-binding domains Null mutant is inviable (haploid divides 2-3 times) YPR112C S000006316
YMR165C	-	-	-0.153272	PAH1	SMP2 Mg<sup>2+</sup>-dependent phosphatidate (PA) phosphatase, catalyzes the dephosphorylation of PA to yield diacylglycerol and P<sub>i</sub>, responsible for de novo lipid synthesis; homologous to mammalian lipin 1 Null mutant is viable, respiration deficient and show increased stability of heterologous plasmids YMR165C S000004775
YDR279W	-	-	-0.153272	RNH202	Ribonuclease H2 subunit, required for RNase H2 activity YDR279W S000002687
YAR014C	-	-	-0.154732	BUD14	Protein involved in bud-site selection, Bud14p-Glc7p complex functions as a cortical regulator of dynein; diploid mutants display a random budding pattern instead of the wild-type bipolar pattern YAR014C S000000069
YPR203W	-	-	-0.154732		NO_MATCH
YLR129W	-	-	-0.154732	DIP2	UTP12 Nucleolar protein, specifically associated with the U3 snoRNA, part of the large ribonucleoprotein complex known as the small subunit (SSU) processome, required for 18S rRNA biogenesis, part of the active pre-rRNA processing complex YLR129W S000004119
YJR101W	-	-	-0.154732	RSM26	Mitochondrial ribosomal protein of the small subunit YJR101W S000003862
YLR290C	-	-	-0.155044		NO_MATCH
YBL083C	-	-	-0.156183		NO_MATCH
YOR264W	-	-	-0.156251	DSE3	Daughter cell-specific protein, may help establish daughter fate YOR264W S000005790
YMR076C	-	-	-0.157369	PDS5	Protein required for establishment and maintenance of sister chromatid condensation and cohesion, colocalizes with cohesin on chromosomes in an interdependent manner, may function as a protein-protein interaction scaffold YMR076C S000004681
YBR139W	-	-	-0.157627		NO_MATCH
YGR176W	-	-	-0.158292		NO_MATCH
YMR138W	-	-	-0.158552	CIN4	GTP1|UGX1 GTP-binding protein involved in beta-tubulin (Tub2p) folding; isolated as mutant with increased chromosome loss and sensitivity to benomyl; regulated by the GTPase-activating protein, Cin2p, the human retinitis pigmentosa 2 (RP2) homolog Null mutant is viable; supersensitivity to benomyl and nocodozole YMR138W S000004746
YHR097C	-	-	-0.159063		NO_MATCH
YBR144C	-	-	-0.160491		NO_MATCH
YBR057C	-	-	-0.160491	MUM2	SPOT8 Cytoplasmic protein essential for meiotic DNA replication and sporulation; interacts with Orc2p, which is a component of the origin recognition complex Mutant is sporualtion defective and fails to perform premiotic DNA synthesis; overexpression suppresses a TOR2 allele YBR057C S000000261
YLR242C	-	-	-0.161201	ARV1	Protein required for normal intracellular sterol distribution and for sphingolipid metabolism; similar to Nup120p and C. elegans R05H5.5 protein temperature sensitive, anaerobically inviable, polyene antibiotic sensitive, inviable in the absence of sterol esterification|Subcellular membrane accumulation of free sterol; Mutations in yeast ARV1 are complemented by expression of human ARV1|Subcellul…
YBR147W	-	-	-0.161536	RTC2	Putative protein of unknown function; the authentic, non-tagged protein is detected in highly purified mitochondria in high-throughput studies; null mutant displays fluconazole resistance and suppresses cdc13-1 temperature sensitivity YBR147W S000000351
YCR020C-A	-	-	-0.161911	MAK31	LSM9|SMX1 Non-catalytic subunit of N-terminal acetyltransferase of the NatC type; required for replication of dsRNA virus; member of the Sm protein family Mutant exhibits defects in the structural stability of L-A family of dsRNA-containing viral particles. YCR020C-A S000000614
YPL038W	-	-	-0.161911	MET31	Zinc-finger DNA-binding protein, involved in transcriptional regulation of the methionine biosynthetic genes, similar to Met32p YPL038W S000005959
YNL180C	-	-	-0.161911	RHO5	Non-essential small GTPase of the Rho/Rac subfamily of Ras-like proteins, likely involved in protein kinase C (Pkc1p)-dependent signal transduction pathway that controls cell integrity YNL180C S000005124
YNL154C	-	-	-0.161911	YCK2	Palmitoylated, plasma membrane-bound casein kinase I isoform; shares redundant functions with Yck1p in morphogenesis, proper septin assembly, endocytic trafficking; provides an essential function overlapping with that of Yck1p Null mutant is viable; yck1 yck2 double deletion mutant is inviable YNL154C S000005098
YLR409C	-	-	-0.161911	UTP21	Possible U3 snoRNP protein involved in maturation of pre-18S rRNA, based on computational analysis of large-scale protein-protein interaction data YLR409C S000004401
YDL123W	-	-	-0.161911	SNA4	Protein of unknown function, localized to the vacuolar outer membrane YDL123W S000002281
YPR144C	-	-	-0.163324	NOC4	UTP19 Nucleolar protein, forms a complex with Nop14p that mediates maturation and nuclear export of 40S ribosomal subunits Null: lethal. Other phenotypes: required for 18S RNA production YPR144C S000006348
YNL181W	-	-	-0.163324		NO_MATCH
YCR065W	-	-	-0.163324	HCM1	Forkhead transcription factor that drives S-phase specific expression of genes involved in chromosome segregation, spindle dynamics, and budding; suppressor of calmodulin mutants with specific SPB assembly defects; telomere maintenance role Null mutant is viable; exacerbates temperature-sensitivity of a cmd1-1 (calmodulin) mutant YCR065W S000000661
YMR049C	-	-	-0.163721	ERB1	Protein required for maturation of the 25S and 5.8S ribosomal RNAs; constituent of 66S pre-ribosomal particles; homologous to mammalian Bop1 YMR049C S000004652
YOR044W	-	-	-0.164093	IRC23	Putative protein of unknown function; green fluorescent protein (GFP)-fusion localizes to the ER; null mutant displays increased levels of spontaneous Rad52p foci YOR044W S000005570
YPL159C	-	-	-0.164503	PET20	Mitochondrial protein, required for respiratory growth under some conditions and for stability of the mitochondrial genome Null: exhibits growth defect on non-fermentable carbon source at 15 degree centigrade, making cells rho-. YPL159C S000006080
YOR374W	-	-	-0.164729	ALD4	ALD7|ALDH2 Mitochondrial aldehyde dehydrogenase, required for growth on ethanol and conversion of acetaldehyde to acetate; phosphorylated; activity is K+ dependent; utilizes NADP+ or NAD+ equally as coenzymes; expression is glucose repressed YOR374W S000005901
YNL248C	-	-	-0.164729	RPA49	RNA polymerase I subunit A49 Null mutant is viable but grows slowly and is temperature or cold sensitive; synthetically lethal with RPA14 YNL248C S000005192
YBR170C	-	-	-0.164729	NPL4	HRD4 Endoplasmic reticulum and nuclear membrane protein, forms a complex with Cdc48p and Ufd1p that recognizes ubiquitinated proteins in the endoplasmic reticulum and delivers them to the proteasome for degradation Temperature-sensitive mutants accumulate nuclear-targeted proteins in the cytoplasm and poly(A)+RNA in the nucleus and show defects in nuclear membrane integrity at the nonpermissive t…
YPL260W	-	-	-0.165472		NO_MATCH
YNL053W	-	-	-0.166126	MSG5	Dual-specificity protein phosphatase required for maintenance of a low level of signaling through the cell integrity pathway; regulates and is regulated by Slt2p; dephosphorylates Fus3p; required for adaptive response to pheromone Null mutant is viable, shows diminished adaptive response to pheromone YNL053W S000004998
YML091C	-	-	-0.166126	RPM2	Protein subunit of mitochondrial RNase P, has roles in nuclear transcription, cytoplasmic and mitochondrial RNA processing, and mitochondrial translation; distributed to mitochondria, cytoplasmic processing bodies, and the nucleus Null mutant is viable, respiratory deficient, accumulate mitochondrial tRNA precursors with 5' extensions, arrest after 25 generations on fermentable media. Spontaneous…
YCR005C	-	-	-0.167516	CIT2	Citrate synthase, catalyzes the condensation of acetyl coenzyme A and oxaloacetate to form citrate, peroxisomal isozyme involved in glyoxylate cycle; expression is controlled by Rtg1p and Rtg2p transcription factors YCR005C S000000598
YGL159W	-	-	-0.167654		NO_MATCH
YBR079C	-	-	-0.168364	RPG1	TIF32 Subunit of the core complex of translation initiation factor 3(eIF3), essential for translation; part of a subcomplex (Prt1p-Rpg1p-Nip1p) that stimulates binding of mRNA and tRNA(i)Met to ribosomes Null mutant is inviable; temperature sensitive mutant arrests in G1 phase YBR079C S000000283
YFR014C	-	-	-0.169106	CMK1	Calmodulin-dependent protein kinase; may play a role in stress response, many CA++/calmodulan dependent phosphorylation substrates demonstrated in vitro, amino acid sequence similar to Cmk2p and mammalian Cam Kinase II YFR014C S000001910
YJL101C	-	-	-0.169243	GSH1	Gamma glutamylcysteine synthetase catalyzes the first step in glutathione (GSH) biosynthesis; expression induced by oxidants, cadmium, and mercury Null mutant is viable, exhibits alteration of glutathione content and reduction in growth rate YJL101C S000003637
YOR018W	-	-	-0.169248	ROD1	Membrane protein; overexpression confers resistance to the GST substrate o-dinitrobenzene as well as to zinc and calcium; contains 2 PY motifs, which are required for Rod1p interaction with Rsp5p, a hect-type ubiquitin ligase Null mutant is viable but is hypersensitive to o-dinitrobenzene, calcium, and zinc YOR018W S000005544
YNL283C	-	-	-0.170274	WSC2	STA3 Partially redundant sensor-transducer of the stress-activated PKC1-MPK1 signaling pathway involved in maintenance of cell wall integrity and recovery from heat shock; secretory pathway Wsc2p is required for the arrest of secretion response Null mutant is viable and shows no phenotypes; slg1 (wsc1)-null wsc2-null double mutant shows a lysis defect on YPD at room temperature and heat shock sen…
YLR462W	-	-	-0.170274		NO_MATCH
YCL068C	-	-	-0.170274		NO_MATCH
YJL005W	-	-	-0.170655	CYR1	CDC35|FIL1|HSR1|SRA4|TSM0185 Adenylate cyclase, required for cAMP production and cAMP-dependent protein kinase signaling; the cAMP pathway controls a variety of cellular processes, including metabolism, cell cycle, stress response, stationary phase, and sporulation Null mutant is inviable. cyr1 transiently arrests in G1 and sporulates precociously. N-terminal domain is dispensable for mitotic G1 …
YLR059C	-	-	-0.171421	REX2	YNT20 RNA exonuclease, required for U4 snRNA maturation; functions redundantly with Rnh70p in 5.8S rRNA maturation, and with Rnh70p and Rex3p in processing of U5 snRNA and RNase P RNA; member of RNase D family of exonucleases Null mutant is viable and shows cold-sensitive respiratory defect YLR059C S000004049
YNL021W	-	-	-0.171642	HDA1	Putative catalytic subunit of a class II histone deacetylase complex that also contains Hda2p and Hda3p; Hda1p interacts with the Hda2p-Hda3p subcomplex to form an active tetramer; deletion increases histone H2B, H3 and H4 acetylation YNL021W S000004966
YDR046C	-	-	-0.1729	BAP3	PAP1 Amino acid permease involved in the uptake of cysteine, leucine, isoleucine and valine YDR046C S000002453
YLR062C	-	-	-0.172982	BUD28	Dubious open reading frame, unlikely to encode a protein; not conserved in closely related Saccharomyces species; 98% of ORF overlaps the verified gene RPL22A; diploid mutant displays a weak budding pattern phenotype in a systematic assay Diploid null mutants exhibit random budding YLR062C S000004052
YPL225W	-	-	-0.173002		NO_MATCH
YMR236W	-	-	-0.173002	TAF9	TAF17 Subunit (17 kDa) of TFIID and SAGA complexes, involved in RNA polymerase II transcription initiation and in chromatin modification, similar to histone H3 YMR236W S000004849
YCR067C	-	-	-0.173002	SED4	Integral endoplasmic reticulum membrane protein, functions as a positive regulator of Sar1p probably through inhibition of GTPase activation by Sec23p; binds Sec16p, participates in vesicle formation, similar to Sec12p Null mutant is viable, shows decreased rate of ER to Golgi transport YCR067C S000000663
YNL177C	-	-	-0.173002	MRPL22	Mitochondrial ribosomal protein of the large subunit YNL177C S000005121
YGL119W	-	-	-0.174119	ABC1	COQ8 Protein required for ubiquinone (coenzyme Q) biosynthesis and for respiratory growth; exhibits genetic interaction with COQ9, suggesting a common function; similar to prokaryotic proteins involved in early steps of ubiquinone biosynthesis YGL119W S000003087
YPR171W	-	-	-0.174356	BSP1	Adapter that links synaptojanins Inp52p and Inp53p to the cortical actin cytoskeleton YPR171W S000006375
YDR322C-A	-	-	-0.174356	TIM11	ATP21 Subunit e of mitochondrial F1F0-ATPase, which is a large, evolutionarily conserved enzyme complex required for ATP synthesis; essential for the dimeric and oligomeric state of ATP synthase YDR322C-A S000007255
YDR006C	-	-	-0.174356	SOK1	Protein whose overexpression suppresses the growth defect of mutants lacking protein kinase A activity; involved in cAMP-mediated signaling; localized to the nucleus; similar to the mouse testis-specific protein PBS13 YDR006C S000002413
YBR132C	-	-	-0.174356	AGP2	High affinity polyamine permease, preferentially uses spermidine over putrescine; expression is down-regulated by osmotic stress; plasma membrane carnitine transporter, also functions as a low-affinity amino acid permease Null mutant is viable; loss of growth on some amino acids as nitrogen source (leu, thr) in a strain which has no Gap1p or Agp1p function YBR132C S000000336
YBR053C	-	-	-0.174356		NO_MATCH
YHR045W	-	-	-0.174535		NO_MATCH
YMR091C	-	-	-0.175261	NPL6	RSC7 Component of the RSC chromatin remodeling complex; interacts with Rsc3p, Rsc30p, Ldb7p, and Htl1p to form a module important for a broad range of RSC functions; involved in nuclear protein import and maintenance of proper telomere length YMR091C S000004697
YMR191W	-	-	-0.176332	SPG5	Protein required for survival at high temperature during stationary phase; not required for growth on nonfermentable carbon sources YMR191W S000004803
YPL078C	-	-	-0.177042	ATP4	LPF7 Subunit b of the stator stalk of mitochondrial F1F0 ATP synthase, which is a large, evolutionarily conserved enzyme complex required for ATP synthesis; phosphorylated Null mutant is viable but is oxidative phosphorylation deficient, is unable to grow on glycerol, shows an F1 loosely bound to mitochondrial membrane, lacks subunit 6 in F0, has a five times lower cytochrome oxidase activity, pr…
YML117W	-	-	-0.177042	NAB6	Putative RNA-binding protein, based on computational analysis of large-scale protein-protein interaction data YML117W S000004585
YML113W	-	-	-0.177042	DAT1	DNA binding protein that recognizes oligo(dA).oligo(dT) tracts; Arg side chain in its N-terminal pentad Gly-Arg-Lys-Pro-Gly repeat is required for DNA-binding; not essential for viability Null mutant is viable, but phenotypically distinguishable YML113W S000004581
YAR002W	-	-	-0.177042	NUP60	Subunit of the nuclear pore complex (NPC), functions to anchor Nup2p to the NPC in a process controlled by the nucleoplasmic concentration of Gsp1p-GTP; potential Cdc28p substrate; involved in telomere maintenance YAR002W S000000063
[truncated: 4,487 more rows]

## Sheet: ufgnem.tab
ORF	S-gene	Ion Homeostasis	LAR	NAME	Description
YGL009C	-	-	12.0768	LEU1	Isopropylmalate isomerase, catalyzes the second step in the leucine biosynthesis pathway Leucine requiring YGL009C S000002977
[truncated: 6,325 more rows]

## Sheet: Column Legend
Column annotation
[truncated: 6 more rows]
